# Supplementary material for: Parallel pathways for serotonin biosynthesis and metabolism in C. elegans
Source: Nat Chem Biol. Author manuscript; Available in PMC 2024 Feb 1. (PMC9898190; doi:10.1038/s41589-022-01148-7)
Supplement: Supplementary Information [file NIHMS1859020-supplement-Supplementary_Information.pdf]

# Parallel pathways for serotonin biosynthesis and metabolism in *C. elegans*

## Supplementary Information

Jingfang Yu<sup>1</sup>, Merly C. Vogt<sup>2</sup>, Bennett W. Fox<sup>1</sup>, Chester J. J. Wrobel<sup>1</sup>, Diana Fajardo Palomino<sup>1</sup>, Brian J. Curtis<sup>1</sup>, Bingsen Zhang<sup>1</sup>, Henry H. Le<sup>1</sup>, Arnaud Tauffenberger<sup>1</sup>, Oliver Hobert<sup>2,\*</sup>, and Frank C. Schroeder<sup>1,\*</sup>

<sup>1</sup>Boyce Thompson Institute and Department of Chemistry and Chemical Biology, Cornell University, Ithaca, NY 14853, USA.

<sup>2</sup>Department of Biological Sciences, Columbia University, Howard Hughes Medical Institute, NY 10027, USA.

\*Corresponding authors: Frank Schroeder, fs31@cornell.edu, and Oliver Hobert, or38@columbia.edu

| Table of Contents           | Page |
|-----------------------------|------|
| 1. Supplementary Figures    | S2   |
| 3. Supplementary Tables     | S9   |
| 2. Chemical Syntheses       | S18  |
| 4. NMR Spectra              | S31  |
| 5. Supplementary References | S55  |

## 2. Supplementary Figures

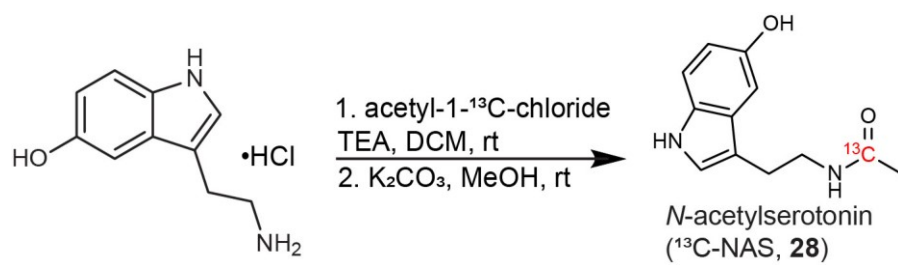

**Supplementary Fig. 1:** Synthesis of <sup>13</sup>C-labeled NAS.

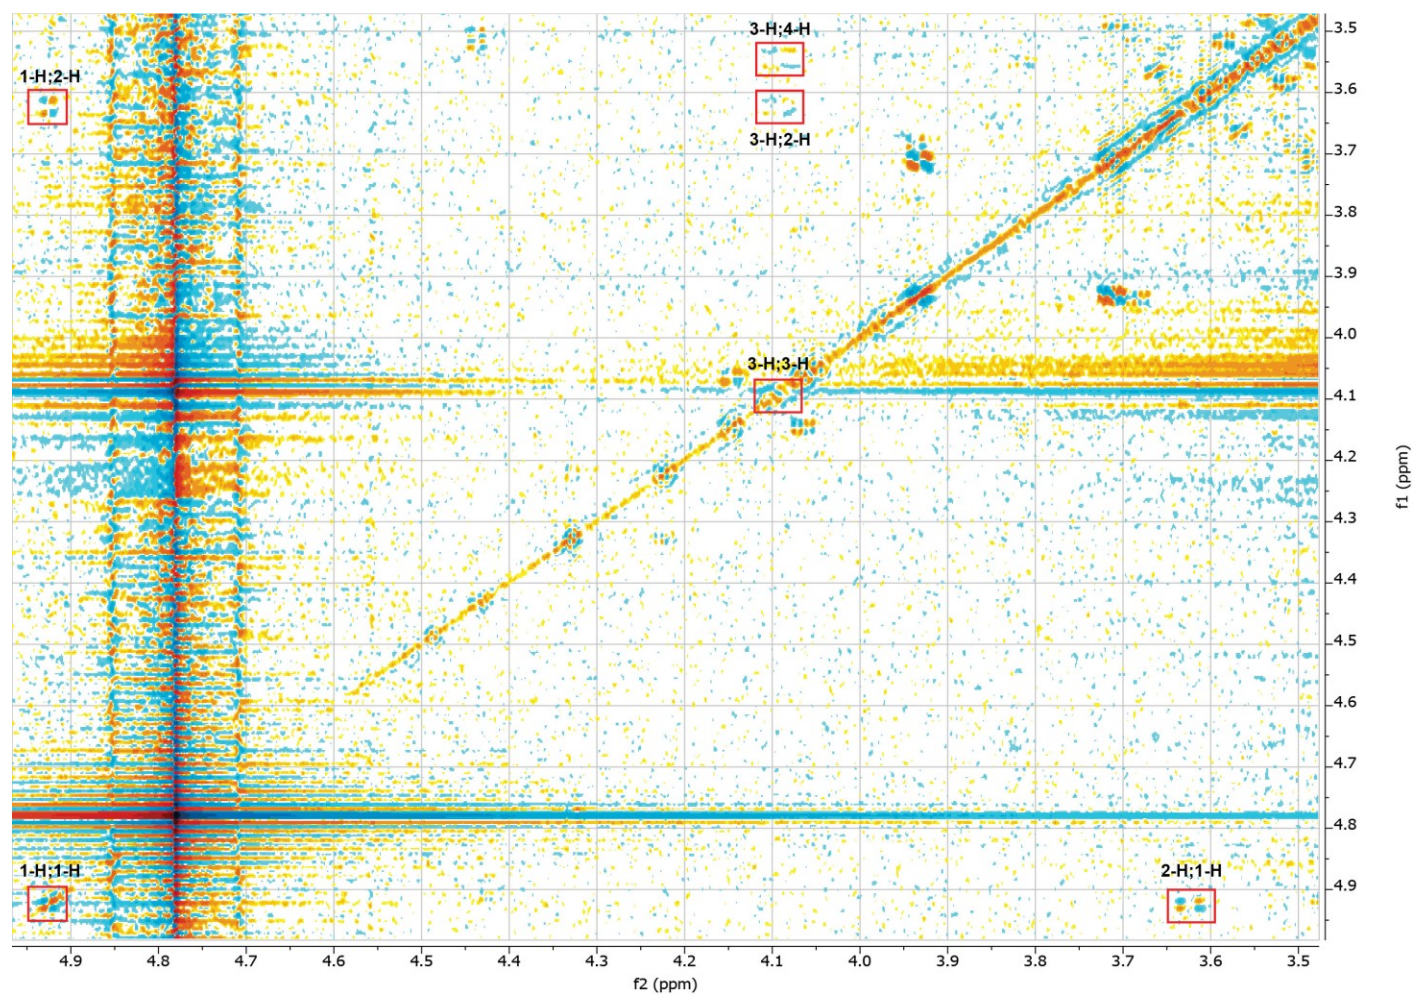

**Supplementary Fig. 2:** dqfCOSY NMR spectrum ( $\text{CD}_3\text{OD}$ , Bruker AVANCE III HD, 800 MHz) of isolated sngl#2 (**30**) from WT animals treated with 0.5 mM serotonin. Crosspeaks showed sngl#2 is a  $\beta$ -glucoside with 3-O-phosphorylation modification.

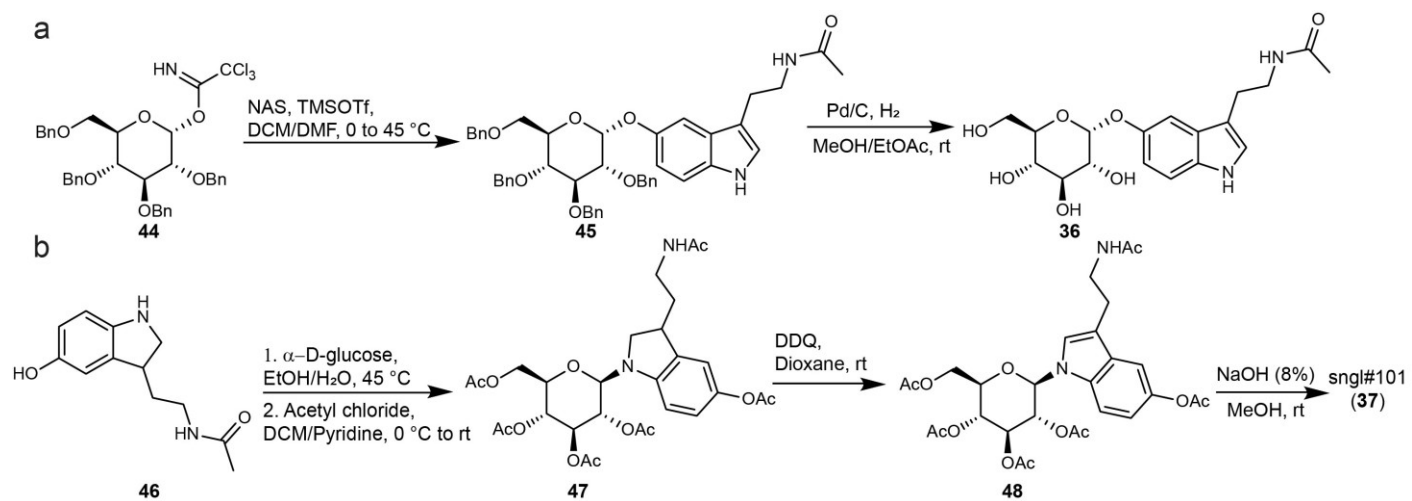

**Supplementary Fig. 3: a**, Scheme for synthesis of **36** ( $\alpha$ -O-linked isomer of sngl#1). **b**, Scheme for synthesis of  $\beta$ -N-linked serotonin glucoside sngl#101.

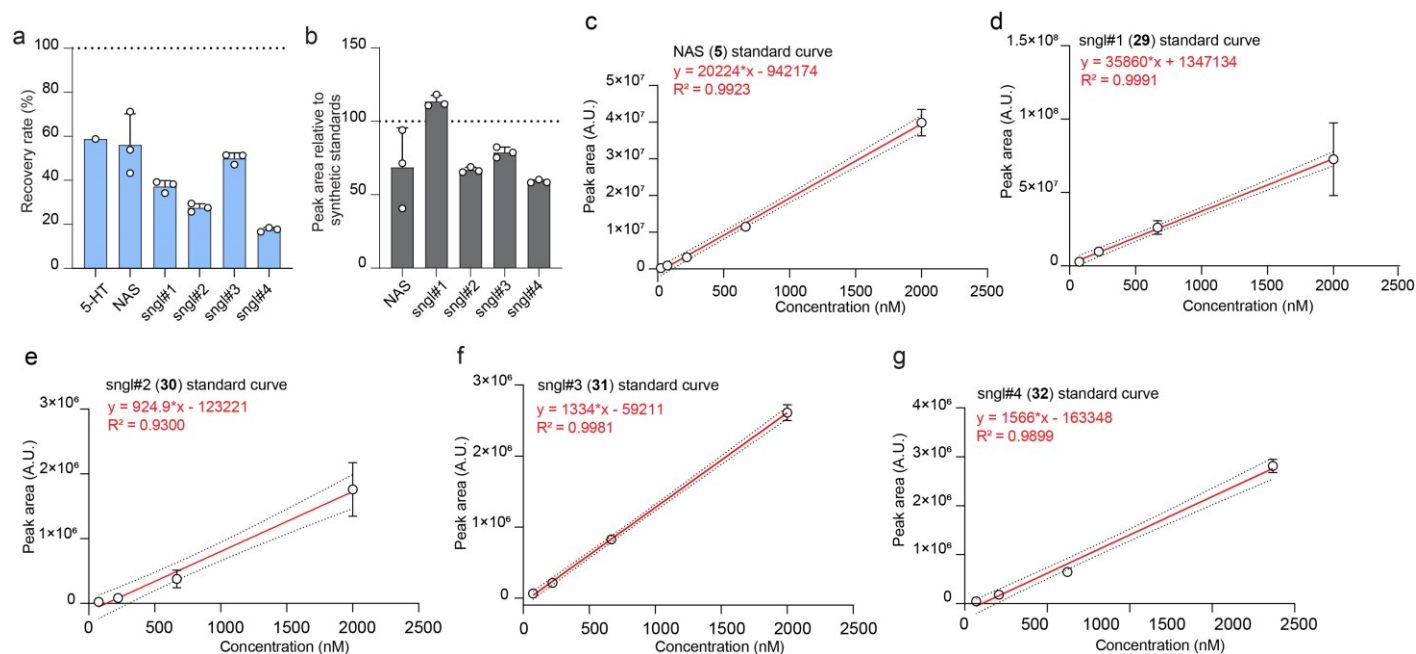

**Supplementary Fig. 4:** **a**, Recovery rate of 5-HT, NAS, and sngl#1-4. Shown are relative abundances of 5-HT, NAS, and sngl#1-4 added to *pah-1(syb3596);tph-1(mg280)* mutant worms at the time of harvest compared to *pah-1(syb3596);tph-1(mg280)* mutant *endo*-metabolome samples to which compounds were added right before mass spectrometric analysis (in case of 5-HT, prior to derivatization, see Methods). **b**, Effect of ion suppression on quantification of NAS and sngl#1-4 in worm *endo*-metabolome samples. Shown are measured peak areas for NAS and sngl#1-4 obtained for samples of *pah-1(syb3596);tph-1(mg280)* mutant *endo*-metabolome, to which NAS and sngl#1-4 were added at a concentration of 1  $\mu$ M right before mass spectrometric analysis, relative to peak areas obtained for a pure sample containing NAS and sngl#1-4 at 1  $\mu$ M. **c-g**, Standard curve for MS-based detection of NAS (5), sngl#1 (29), sngl#2 (30), sngl#3 (31), and sngl#4 (32). Data in **a** and **b** represent 3 independent replicates, except for 5-HT recovery rate in **a**, where  $n = 1$ . Data in **c-g** represent 2 independent experiments, except for **e**, where 3 independent experiments were measured for sngl#2 standard curve. Bars in **a-g** indicate mean  $\pm$  s.d.

**a** >Coding sequence

ATGCCACCAGCTGGACAAGATGATCTTGACTTCTTGAAGTACGCCATGGAATCGTACGTTGCTGACGTCAACG  
 CCGACATTGGCAAGACTACTATCGTATTCACTCTTCGTGAAAAGGCAGGAGCTCTCGCTGAAACATTGAAGCT  
 GTTCCAGGCACATGATGTGAATCTGTCTCACATTGAATCAAGACCATCAAAGACTCATGAAGGATGCTATGAG  
 GTGCTCGTTGAATTTGCTGAAGCTGAAGACCATCGTAAGATTGAAGGAGTTATTGAGCATTCCAACAAAAAG  
 CTGAAAAGAAGGTTCTTGTTCAGACTGGAACACCAAAAAACAAACAAAACAAGGATTCTGTTCCATGGTTCCC  
 ACAGAAGATCAACGACATCGATCAATTTGCCAACAGAATTCTTTCTTATGGAGCTGAGCTTGATGCCGATCAC  
 CCTGGATTTAAGGACATGACCTACCGCGAGCGCAGAAAGTTTTTCGCCGATATTGCATTCAACTCAAACACG  
 GAGACAAGATCCCTACTATCACCTACACTGATGAAGAAATTGCCACGTGGCGTACAGTCTACAACGAGCTGAC  
 AGTTATGTACCCGAAAAACGCTTGCCAAGAGTTCAACTACATATTTCCACTCCTCCAGCAGAATTGTGGTTTT  
 GGACCTGACCGCATTCACAATTGCAGGATGTTTCAGATTTTTTGAAGGATTGTACCGGGTACACGATTCGAC  
 CAGTCGCTGGTCTTCTTCTCTCGTGATTTCTTGGCTGGTTGGCCTCCGTGTTTTTCATTCCACACAATA  
 CATTCGCCATCATTCGCTCCAAAATACACACCTGAACCAGATATCTGCCACGAGCTTCTGGGACATGTTCCA  
 CTATTTGCTGATGTTGAATTTGCACAATTCTCACAGGAAATCGGTCTTGCTTCTCTGGAGCTCCAGATGATG  
 TTATTGAAAACTTGCCACACTCTACTGGTTCACAATCGAATTGGAATCTGTCAACAAGATGGGGAGAAAAA  
 AGCTTACGGAGCCGACTTTTGAGTTCAATTGGAGAGCTTCAATATGCGTTGAGTGATAAGCCGGAAGTTGTA  
 GATTTTGATCCAGCTGTATGTTGTGTCCACAAATATCAATCACAGAATATCAGCCAAAGTATTCTTAGCTG  
 AATCATTTGCAAGTGCTAAGAACAACTTAAATCATGGGCAGCTACCATCAATCGTCCATTCCAAATTCGTTA  
 TAATGCTTACACTCAACGAGTTGAAATTCTCGACAAGGTAGCAGCACTTCAACGTCTCGCAAGAGACATCAGA  
 AGTGATATTTCTACTTTGGAAGAAGCTCTTGGAAGTGAACAATCTCAAGATGAAGTGA

**b** *H. sapiens* 23 SYIEDNCNQNGAISLIFSLKEEVGALAKVLRLEENDVNLTHIESRPSRLKKDEYEFFTH 82  
 SY+ D G +++F+L+E+ GALA+ L+LF+ +DVNL+HIESRPS+ + YE  
*C. elegans* 18 SYVADVNADIGKTTIVFTLREKAGALAETLKLQAHQVNLSHIESRPSKTHEGCYEVLVE 77

83 L-----DKRSLPALTNII-----KILRHDIGATVHELSDRDKKDTVPWFPTIQELDRFA 132  
 D R + + K+L D + KD+VPWFP+ I ++D+FA  
 78 FAEAEDHRKIEGVIEHFQQAEEKVLVDWNT-----KNKQNKDSVPWFQPKINDIDQFA 132

133 NQILSYGAELDADHPGFKDPVYRARRKQFADIAYNRYRHGQPIPRVEYMEEKKTWGTVFK 192  
 N+ILSYGAELDADHPGFKD YR RRR FADIA+N++HG IP + Y +EE TW TV+  
 133 NRILSYGAELDADHPGFKDMYRERRKFFADIAFNFKHGDKIPTITYTDEEIIATWRTVYN 192

193 TLKSLYKTHACYEYNHIFPLLEKYCGFHEDNIPQLEDVVSQFLQTCTGFRLRPVAGLLSSR 252  
 L +Y +AC E+N+IFPLL++ CGF D IPQL+DVS FL+ CTG+ +RPVAGLLSSR  
 193 ELTVMYPKNACQEFNYIFPLLOQNCGFGPDRIPLQDVSDFLKDCTGYTIRPVAGLLSSR 252

253 DFLGGLAFRVFHTQYIRHGSKPMYTPDPDICHHELLGHVPLFSDRSFAQFSQEIGLASLG 312  
 DFL GLAFRVFH TQYIRH S P YTPDPDICHHELLGHVPLF+D FAQFSQEIGLASLG  
 253 DFLAGLAFRVFHSTQYIRHHSAPKYTPDPDICHHELLGHVPLFADVEFAQFSQEIGLASLG 312

313 APDEYIEKLATYWFTEFGLCKQGDSIKAYGAGLLSSFGEQYCLSEKPKLLPLELEKT 372  
 APD+ IEKLAT+YWFT+EFG+C+Q KAYGAGLLSSFGEQY LS+KP+++ +  
 313 APDDVIEKLATLYWFTIEFGICQQDGEKKAYGAGLLSSFGEQYALSDKPEVVDFDPAVC 372

373 AIQNYTVTEFQPLYVAESFNDAKEKVRNFAATIPRPFVRYDPYTQRIEVLDTQQLKI 432  
 + Y +TE+QP Y++AESF AK K++++AATI RPF +RY+ YTQR+E+LD L+  
 373 CVTKYPITEYQPKYFLAESFASAKNKLKSWAATINRPFQIRYNAYTQRIEVLDTQQLKI 432

433 LADSINSEIGILCSALQKI 451  
 LA I S+I L AL K+  
 433 LARDIRSDISTLEEALGKV 451

CRISPR deletion

**Supplementary Fig. 5: a**, Coding sequence of *pah-1* (*syb3601*). Sections marked red were deleted. **b**, Sequence alignments of *C. elegans* PAH-1 and human PAH. The protein sequence of Cel-PAH-1 was submitted to an NCBI BLASTp search (restricted to species *Homo sapiens*, conditional compositional BLOSUM62, gap open cost: 11, gap extension cost: 1, word size: 6).

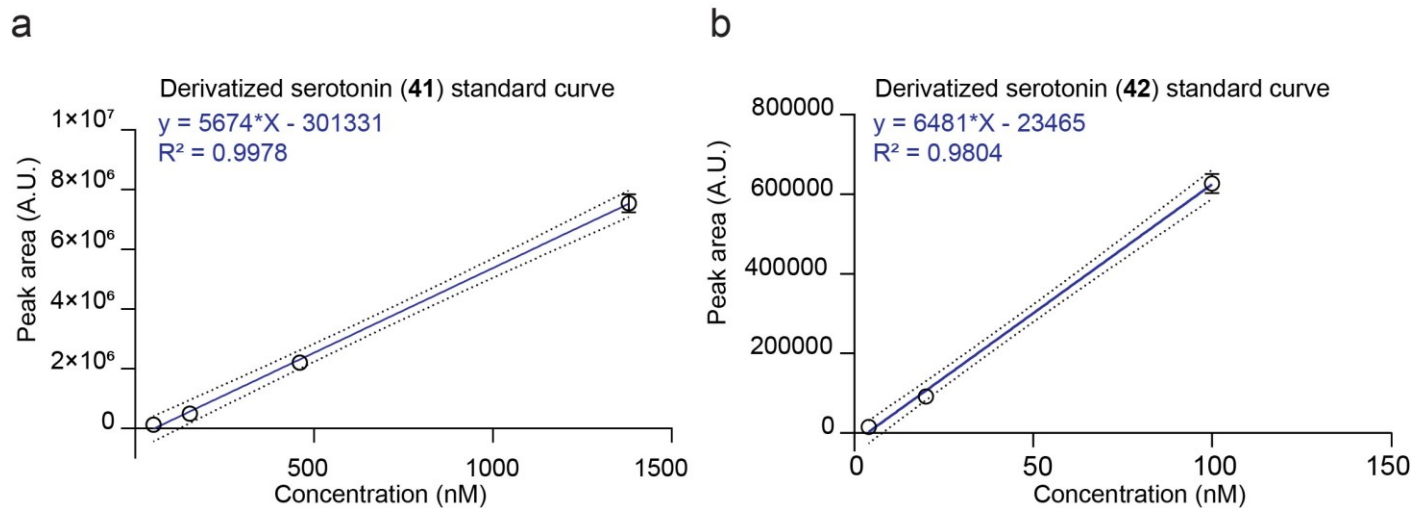

**Supplementary Fig. 6: a, b**, Standard curve for MS-based detection of mono-dansyl-derivatized serotonin (**41**) and di-dansyl-derivatized serotonin (**42**). Data in **a** and **b** represent 2 independent experiments, and bars indicate mean  $\pm$  s.d.

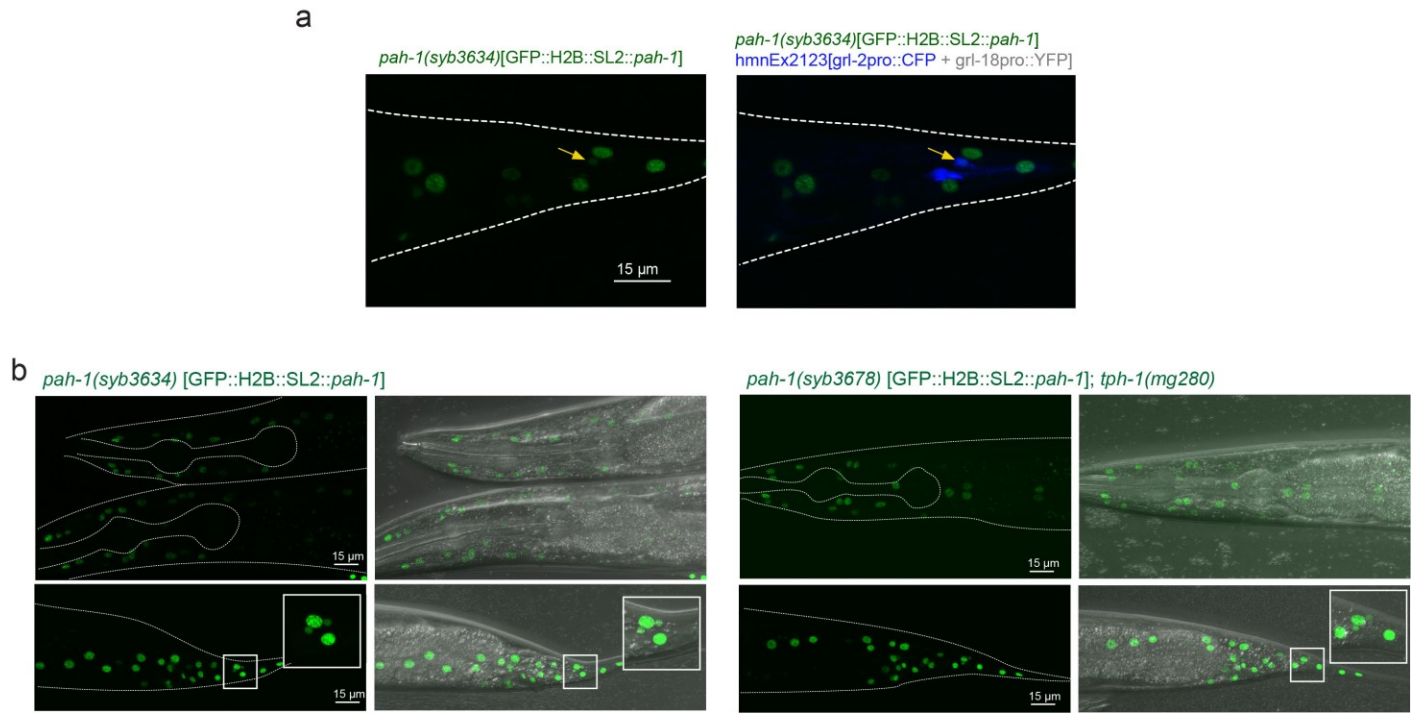

**Supplementary Fig. 7: a**, *GFP::H2B::SL2::PAH-1* (green) co-localizes with the phasmod socket glial cell-specific marker *grl-2pro::CFP* (blue) in the tail of adult hermaphrodites. **b**, Comparison of *GFP::H2B::T2A::pah-1*-expression in WT and *tph-1(mg280)* mutant background revealed no differences, indicating that loss of *tph-1* does not strongly affect *pah-1* expression patterns. Scale bar = 15 μm. For each genotype, at least 10 animals were scored on day 1 of Adulthood for GFP expression under well fed conditions on at least 2 different days.

## 2. Supplementary Tables

**Supplementary Table 1. *C. elegans* strains used in this work.**

| Gene/genotype                                                                          | Strain  | Allele         | Source                               | Genotyped | Outcrossed |
|----------------------------------------------------------------------------------------|---------|----------------|--------------------------------------|-----------|------------|
| <i>C. elegans</i> wildtype                                                             | N2      |                | Caenorhabditis Genetics Center (CGC) | Yes       |            |
| <i>tph-1</i>                                                                           | MT15434 | <i>mg280</i>   | CGC                                  | Yes       | No         |
| <i>tph-1</i>                                                                           | MT14984 | <i>n4622</i>   | CGC                                  | Yes       | Yes        |
| <i>pah-1</i>                                                                           | PHX3601 | <i>syb3601</i> | SunyBiotech                          | Yes       | No         |
| <i>pah-1(syb3596);tph-1(mg280)</i>                                                     | PHX3596 |                | SunyBiotech                          | Yes       | No         |
| <i>bas-1</i>                                                                           | MT7988  | <i>ad446</i>   | CGC                                  | Yes       | Yes        |
| <i>cat-2</i>                                                                           | CB1112  | <i>e1112</i>   | CGC                                  | Yes       | No         |
| <i>glo-1</i>                                                                           | DH10    | <i>zu437</i>   | CGC                                  | Yes       | Yes        |
| <i>pah-1(syb3634)[GFP::H2B::T2A::pah-1]</i>                                            | PHX3634 |                | SunyBiotech                          | Yes       | No         |
| <i>pah-1(syb3678)[GFP::H2B::T2A::pah-1];tph-1(mg280)</i>                               | PHX3678 |                | SunyBiotech                          | Yes       | No         |
| <i>pah-1(syb3634)[GFP::H2B::T2A::pah-1];nsls698 [mir-228p::NLS::RFP]</i>               | OH17653 |                | This work                            | Yes       | No         |
| <i>pah-1(syb3634)[GFP::H2B::T2A::pah-1];nsls698[mir-228p::NLS::RFP];tph-1[mg280]</i>   | OH17654 |                | This work                            | Yes       | No         |
| <i>pah-1(syb3634)[GFP::H2B::T2A::pah-1], hmnEx2123[grl-2pro::CFP + grl-18pro::YFP]</i> | OH17655 |                | This work                            | Yes       | No         |
| <i>cest-4(syb5218)[cest-4::SL2::GFP::H2B]</i>                                          | PHX5218 | <i>syb5218</i> | SunyBiotech                          | Yes       | No         |
| <i>bas-1(syb5923)[bas-1::SL2::GFP::H2B]</i>                                            | PHX5923 | <i>syb5923</i> | SunyBiotech                          | Yes       | No         |

|                 |         |                |                                   |     |    |
|-----------------|---------|----------------|-----------------------------------|-----|----|
| <i>cest-1.1</i> | PS8031  | <i>sy1180</i>  | Le. <i>et al</i> <sup>1</sup>     | Yes | No |
| <i>cest-1.1</i> | PS8032  | <i>sy1181</i>  | Le. <i>et al</i> <sup>1</sup>     | Yes | No |
| <i>cest-1.2</i> | PHX3928 | <i>syb3928</i> | Wrobel. <i>et al</i> <sup>2</sup> | Yes | No |
| <i>cest-19</i>  | PS8029  | <i>sy1178</i>  | Le. <i>et al</i> <sup>1</sup>     | Yes | No |
| <i>cest-19</i>  | PS8030  | <i>sy1179</i>  | Le. <i>et al</i> <sup>1</sup>     | Yes | No |
| <i>cest-2.2</i> | PS8008  | <i>sy1170</i>  | Le. <i>et al</i> <sup>1</sup>     | Yes | No |
| <i>cest-2.2</i> | PS8009  | <i>sy1171</i>  | Le. <i>et al</i> <sup>1</sup>     | Yes | No |
| <i>cest-3</i>   | PHX3937 | <i>syb3937</i> | SunyBiotech                       | Yes | No |
| <i>cest-33</i>  | PS8033  | <i>sy1182</i>  | Le. <i>et al</i> <sup>1</sup>     | Yes | No |
| <i>cest-33</i>  | PS8034  | <i>sy1183</i>  | Le. <i>et al</i> <sup>1</sup>     | Yes | No |
| <i>cest-4</i>   | PS8116  | <i>sy1192</i>  | Le. <i>et al</i> <sup>1</sup>     | Yes | No |
| <i>cest-4</i>   | PS8117  | <i>sy1193</i>  | Le. <i>et al</i> <sup>1</sup>     | Yes | No |
| <i>cest-6</i>   | RB1804  | <i>ok2338</i>  | Le. <i>et al</i> <sup>1</sup>     | Yes | No |
| <i>cest-8</i>   | PS7953  | <i>sy1163</i>  | Sternberg lab                     | Yes | No |
| <i>cest-8</i>   | PS7954  | <i>sy1164</i>  | Sternberg lab                     | Yes | No |
| <i>ges-1</i>    | RB2053  | <i>ok2716</i>  | Le. <i>et al</i> <sup>1</sup>     | Yes | No |

**Supplementary Table 2. *E. coli* strains used in this work.**

| Strain                     | Source                               |
|----------------------------|--------------------------------------|
| OP50                       | Caenorhabditis Genetics Center (CGC) |
| BW25113 (K12)              | Baba. <i>et al</i> <sup>3</sup>      |
| JW3686-7 ( $\Delta tnaA$ ) | Baba. <i>et al</i> <sup>3</sup>      |

**Supplementary Table 3. Primer sequence for RT-PCR.**

| Primer           | Sequence                           |
|------------------|------------------------------------|
| <i>ama-1</i> FWD | CGA CGA GTC CAA CGT ACT CTC CA     |
| <i>ama-1</i> REV | AAT AGG TAG GCG ACG ACG GC         |
| <i>cat-2</i> FWD | CAG CTC ACC GAT CAG ATG AGG        |
| <i>cat-2</i> REV | GCG TTG GGT CAG TGG AAG            |
| <i>tph-1</i> FWD | CAA TAC TAC TCG AAG AAA GCT GCT    |
| <i>tph-1</i> REV | TCC TAA CGA TCC ACT TCG ACG        |
| <i>pah-1</i> FWD | TGA TGC CGA TCA CCC TGG            |
| <i>pah-1</i> REV | GTG TAG CTG ATA GTA GGG ATC TTG TC |

**Supplementary Table 4.** NMR spectroscopic data for **36**.  $^1\text{H}$  (600 MHz), dqfCOSY, HSQC and HMBC NMR spectroscopic data were acquired in methanol- $d_4$ .

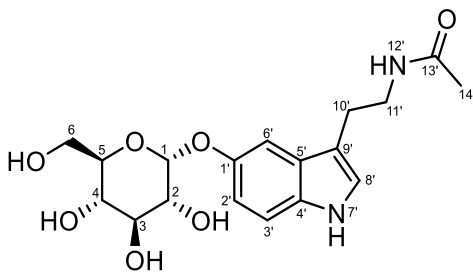

**36**

| Position | $\delta^{13}\text{C}$ [ppm] | $\delta^1\text{H}$ [ppm] (Multiplicity, $J_{\text{HH}}$ [Hz]) | HMBC                                                    |
|----------|-----------------------------|---------------------------------------------------------------|---------------------------------------------------------|
| 1        | 100.7                       | 5.40 (d, $J_{1,2} = 3.7$ )                                    | C-1', C-2, C-3                                          |
| 2        | 73.3                        | 3.57 (dd, $J_{2,3} = 9.7$ )                                   | C-3, C-4 (weak)                                         |
| 3        | 74.9                        | 3.89 (dd, $J_{3,4} = 9.2$ )                                   | C-2, C-4                                                |
| 4        | 71.5                        | 3.43 (m)                                                      | C-3, C-5, C-6                                           |
| 5        | 73.8                        | 3.86                                                          | C-6 (weak)                                              |
| 6a       | 62.3                        | 3.73 (dd, $J_{5,6a} = 5.4$ , $J_{6a,6b} = 12.0$ )             | C-4, C-5                                                |
| 6b       |                             | 3.83 (dd, $J_{5,6b} = 2.4$ )                                  | C-4, C-5                                                |
| 1'       | 151.9                       |                                                               |                                                         |
| 2'       | 114.5                       | 6.97 (dd, $J_{2',3'} = 8.7$ , $J_{2',6'} = 2.3$ )             | C-1', C-4', C-6'                                        |
| 3'       | 112.2                       | 7.23 (d)                                                      | C-1', C-5', C-6'                                        |
| 4'       | 134.2                       |                                                               |                                                         |
| 5'       | 128.8                       |                                                               |                                                         |
| 6'       | 107.2                       | 7.40 (d)                                                      | C-1', C-2', C-4', C-9'                                  |
| 7'       |                             |                                                               |                                                         |
| 8'       | 124.1                       | 7.05 (s)                                                      | C-1'(weak), C-4', C-5', C-6' (weak), C-9', C-10', C-11' |
| 9'       | 113.0                       |                                                               |                                                         |
| 10'      | 25.9                        | 2.89 (t, $J_{10',11'} = 7.4$ )                                | C-5', C-8', C-9', C-11'                                 |
| 11'      | 41.2                        | 3.44 (m)                                                      | C-9', C-10', C-13'                                      |
| 12'      |                             |                                                               |                                                         |
| 13'      | 172.8                       |                                                               |                                                         |
| 14'      | 22.3                        | 1.91 (s)                                                      | C-13'                                                   |

**Supplementary Table 5.** NMR spectroscopic data for sngl#101 (**37**).  $^1\text{H}$  (600 MHz), dqfCOSY, HSQC and HMBC NMR spectra were acquired in methanol- $d_4$ .

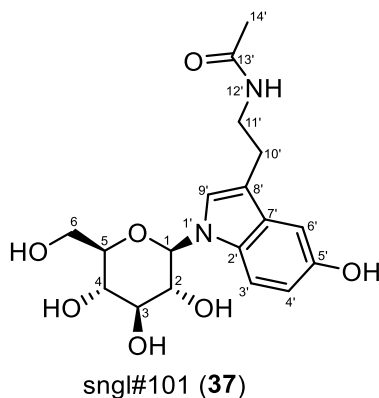

| Position | $\delta^{13}\text{C}$ [ppm] | $\delta^1\text{H}$ [ppm] (Multiplicity, $J_{\text{HH}}$ [Hz])      | HMBC                                 |
|----------|-----------------------------|--------------------------------------------------------------------|--------------------------------------|
| 1        | 86.4                        | 4.85 (d, $J_{1,2} = 9.0$ )                                         | C-2, C-3, C-5, C-7', C-9'            |
| 2        | 73.1                        | 3.89 (t, $J_{2,3} = 9.0$ )                                         | C-1, C-3                             |
| 3        | 78.7                        | 3.57 (t, $J_{3,4} = 9.0$ )                                         | C-2, C-4                             |
| 4        | 71.1                        | 3.46 (t)                                                           | C-3, C-5, C-6 (weak)                 |
| 5        | 80.0                        | 3.54 (ddd, $J_{4,5} = 9.7$ , $J_{5,6a} = 5.6$ , $J_{5,6b} = 2.3$ ) | C-2, C-4                             |
| 6a       | 62.3                        | 3.69 (dd, $J_{6a,6b} = 12.2$ )                                     | C-1 (weak)                           |
| 6b       |                             | 3.86 (dd)                                                          | C-4 (weak)                           |
| 1'       |                             |                                                                    |                                      |
| 2'       | 130.5                       |                                                                    |                                      |
| 3'       | 111.7                       | 7.32 (d, $J_{3',4'} = 8.8$ )                                       | C-2', C-5', C-6' (weak), C-7' (weak) |
| 4'       | 112.3                       | 6.72 (dd, $J_{4',6'} = 2.3$ )                                      | C-5' (weak), C-6', C-7'              |
| 5'       | 151.7                       |                                                                    |                                      |
| 6'       | 103.6                       | 6.92 (d)                                                           | C-4', C-5', C-7', C-8' (weak)        |
| 7'       | 132.8                       |                                                                    |                                      |
| 8'       | 113.3                       |                                                                    |                                      |
| 9'       | 124.6                       | 7.19 (s)                                                           | C-2', C-3', C-7', C-8' (weak)        |
| 10'      | 25.8                        | 2.84 (t, $J_{10',11'} = 7.3$ )                                     | C-2', C-8', C-9', C-11'              |
| 11'      | 40.9                        | 3.44 (t)                                                           | C-2', C-8', C-9', C-10', C-13'       |
| 12'      |                             |                                                                    |                                      |
| 13'      | 172.9                       |                                                                    |                                      |
| 14'      | 22.1                        | 1.91 (s)                                                           | C-13'                                |

**Supplementary Table 6.** NMR spectroscopic data for sngl#1 (**29**).  $^1\text{H}$  (600 MHz), dqfCOSY, HSQC and HMBC NMR spectra were acquired in methanol- $d_4$ .

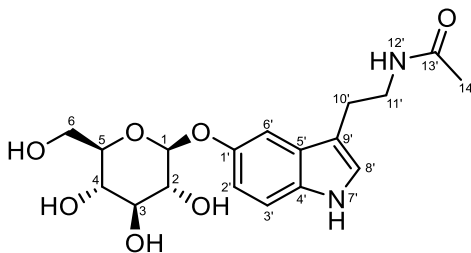

sngl#1 (**29**)

| Position | $\delta^{13}\text{C}$ [ppm] | $\delta^1\text{H}$ [ppm] (Multiplicity, $J_{\text{HH}}$ [Hz]) | HMBC                                              |
|----------|-----------------------------|---------------------------------------------------------------|---------------------------------------------------|
| 1        | 103.9                       | 4.85 (m)                                                      | C-1', C-2, C-3                                    |
| 2        | 77.7                        | 3.46 (m)                                                      | C-1', C-3                                         |
| 3        | 71.3                        | 3.39 (m)                                                      | C-4, C-6 (weak)                                   |
| 4        | 74.8                        | 3.47 (m)                                                      | C-2, C-5                                          |
| 5        | 77.7                        | 3.44 (m)                                                      | C-3, C-4                                          |
| 6a       | 62.3                        | 3.71 (dd, $J_{5,6a} = 5.9$ , $J_{6a,6b} = 12.0$ )             | C-3, C-5                                          |
| 6b       |                             | 3.93 (dd, $J_{5,6b} = 2.2$ )                                  | C-3, C-5 (weak)                                   |
| 1'       | 152.4                       |                                                               |                                                   |
| 2'       | 114.0                       | 6.96 (dd, $J_{2',3'} = 8.8$ , $J_{2',6'} = 2.3$ )             | C-1', C-4', C-6'                                  |
| 3'       | 112.1                       | 7.22 (d)                                                      | C-1', C-4' (weak), C-5', C-6'                     |
| 4'       | 134.0                       |                                                               |                                                   |
| 5'       | 128.6                       |                                                               |                                                   |
| 6'       | 106.3                       | 7.35 (d)                                                      | C-1', C-2', C-3' (weak), C-4', C-9'               |
| 7'       |                             |                                                               |                                                   |
| 8'       | 124.1                       | 7.06 (s)                                                      | C-1' (weak), C-4', C-5', C-6' (weak), C-9', C-11' |
| 9'       | 112.8                       |                                                               |                                                   |
| 10'      | 25.6                        | 2.89 (t, $J_{10',11'} = 7.4$ )                                | C-5', C-8', C-9', C-11'                           |
| 11'      | 40.9                        | 3.45 (m)                                                      | C-10', C-13'                                      |
| 12'      |                             |                                                               |                                                   |
| 13'      | 172.8                       |                                                               |                                                   |
| 14'      | 22.2                        | 1.91 (s)                                                      | C-13'                                             |

**Supplementary Table 7.** NMR spectroscopic data for sngl#2 (**30**).  $^1\text{H}$  (600 MHz), dqfCOSY, HSQC and HMBC NMR spectra were acquired in methanol- $d_4$ .

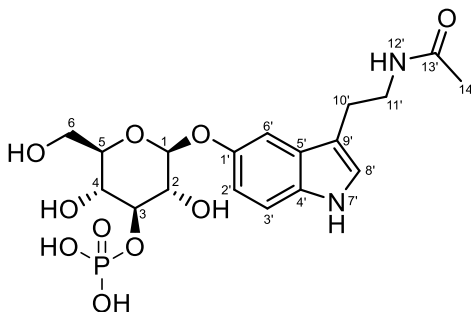

sngl#2 (**30**)

| Position | $\delta^{13}\text{C}$ [ppm] | $\delta^1\text{H}$ [ppm] (Multiplicity, $J_{\text{HH}}$ [Hz]) | HMBC                                             |
|----------|-----------------------------|---------------------------------------------------------------|--------------------------------------------------|
| 1        | 103.5                       | 4.93 (d, $J_{1,2} = 7.3$ )                                    | C-1' (weak)                                      |
| 2        | 74.0                        | 3.65 (br, m)                                                  |                                                  |
| 3        | 83.5                        | 4.20 (br, m)                                                  |                                                  |
| 4        | 70.5                        | 3.60 (br, m)                                                  |                                                  |
| 5        | 77.3                        | 3.49 (br, m)                                                  |                                                  |
| 6a       | 62.2                        | 3.73 (dd, $J_{5,6a} = 5.1$ , $J_{6a,6b} = 12.1$ )             |                                                  |
| 6b       |                             | 3.93 (d)                                                      |                                                  |
| 1'       | 152.4                       |                                                               |                                                  |
| 2'       | 114.0                       | 6.95 (dd, $J_{2',3'} = 8.7$ , $J_{2',6'} = 1.8$ )             | C-1', C-4', C-6'                                 |
| 3'       | 112.2                       | 7.22 (d)                                                      | C-1', C-5', C-6'                                 |
| 4'       | 134.1                       |                                                               |                                                  |
| 5'       | 128.7                       |                                                               |                                                  |
| 6'       | 106.5                       | 7.35 (d)                                                      | C-1', C-2', C-4', C-9'                           |
| 7'       |                             |                                                               |                                                  |
| 8'       | 124.3                       | 7.06 (s)                                                      | C-1' (weak), C-3', C-4', C-5', C-6', C-9', C-10' |
| 9'       | 113.0                       |                                                               |                                                  |
| 10'      | 25.9                        | 2.89 (t, $J_{10',11'} = 7.4$ )                                | C-5', C-8', C-9', C-11'                          |
| 11'      | 41.1                        | 3.44 (t)                                                      | C-9', C-10', C-13'                               |
| 12'      |                             |                                                               |                                                  |
| 13'      | 172.9                       |                                                               |                                                  |
| 14'      | 22.3                        | 1.91 (s)                                                      | C-13'                                            |

**Supplementary Table 8.** NMR spectroscopic data for sngl#3 (**31**).  $^1\text{H}$  (800 MHz), dqfCOSY, HSQC and HMBC NMR spectra were acquired in methanol- $d_4$ .

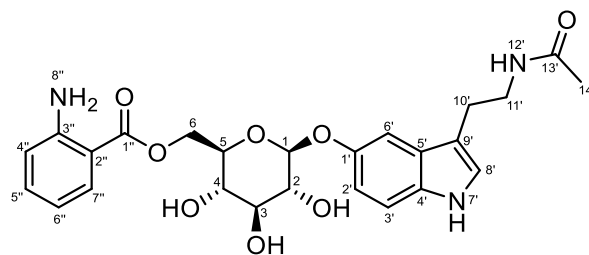

sngl#3 (**31**)

| Position | $\delta^{13}\text{C}$ [ppm] | $\delta^1\text{H}$ [ppm] (Multiplicity, $J_{\text{HH}}$ [Hz]) | HMBC                                                      |
|----------|-----------------------------|---------------------------------------------------------------|-----------------------------------------------------------|
| 1        | 104.0                       | 4.88 (d, $J_{1,2} = 7.3$ )                                    | C-3, C-4, C-5, C-1'                                       |
| 2        | 74.9                        | 3.50 (m)                                                      | C-1, C-3                                                  |
| 3        | 77.8                        | 3.52 (m)                                                      | C-2, C-4                                                  |
| 4        | 71.9                        | 3.46 (m)                                                      | C-3, C-5, C-6                                             |
| 5        | 75.3                        | 3.74 (ddd, $J_{5,6a} = 2.1$ )                                 | C-1, C-3, C-4, C-6                                        |
| 6a       | 64.4                        | 4.70 (dd, $J_{6a,6a} = 11.8$ )                                | C-4, C-5, C-1''                                           |
| 6b       |                             | 4.37 (dd, $J_{5,6b} = 7.0$ )                                  | C-4, C-5, C-1''                                           |
| 1'       | 152.6                       |                                                               |                                                           |
| 2'       | 114.2                       | 6.98 (dd, $J_{2',3'} = 8.7$ , $J_{2',6'} = 2.2$ )             | C-1', C-4', C-6'                                          |
| 3'       | 112.2                       | 7.16 (d)                                                      | C-1', C-5', C-6'                                          |
| 4'       | 134.6                       |                                                               |                                                           |
| 5'       | 129.0                       |                                                               |                                                           |
| 6'       | 107.0                       | 7.28 (d)                                                      | C-1', C-2', C-4', C-9'                                    |
| 7'       |                             |                                                               |                                                           |
| 8'       | 124.2                       | 7.05 (s)                                                      | C-1' (weak), C-4', C-5', C-9', C-10' (weak), C-11' (weak) |
| 9'       | 113.3                       |                                                               |                                                           |
| 10'      | 25.9                        | 2.81 (t, $J_{10',11'} = 7.3$ )                                | C-5', C-8', C-9', C-11'                                   |
| 11'      | 41.1                        | 3.39 (t)                                                      | C-9', C-10', C-13'                                        |
| 12'      |                             |                                                               |                                                           |
| 13'      | 173.1                       |                                                               |                                                           |
| 14'      | 22.3                        | 1.89 (s)                                                      | C-13'                                                     |
| 1''      | 169.2                       |                                                               |                                                           |
| 2''      | 111.2                       |                                                               |                                                           |
| 3''      | 152.6                       |                                                               |                                                           |
| 4''      | 117.5                       | 6.71 (d, $J_{4'',5''} = 8.3$ )                                | C-1'' (weak), C-2'', C-6'', C-7'' (weak)                  |
| 5''      | 134.8                       | 7.22 (ddd, $J_{5'',7''} = 1.3$ , $J_{5'',6''} = 6.7$ )        | C-3'', C-7''                                              |
| 6''      | 116.4                       | 6.49 (ddd, $J_{4'',6''} = 0.9$ , $J_{6'',7''} = 8.1$ )        | C-1'' (weak), C-2'', C-3'', C-4'', C-5'', C-7''           |
| 7''      | 132.0                       | 7.78 (dd)                                                     | C-1'', C-3'', C-4'' (weak), C-5''                         |
| 8''      |                             |                                                               | C-1'', C-3'', C-4'' (weak), C-5''                         |

**Supplementary Table 9.** NMR spectroscopic data for sngl#4 (**32**).  $^1\text{H}$  (600 MHz), dqfCOSY, HSQC and HMBC NMR spectra were acquired in methanol- $d_4$ . Spectra chemical shifts are relative to residual methanol- $d_4$ .

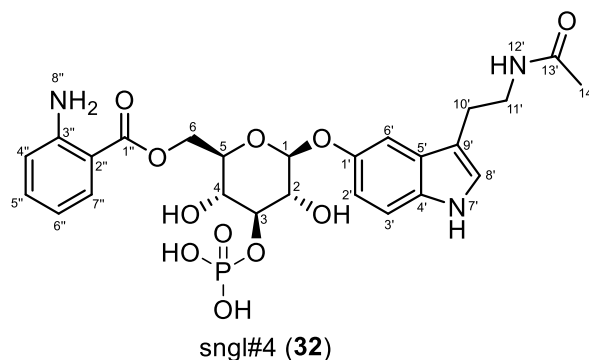

| Position | $\delta^{13}\text{C}$ [ppm] | $\delta^1\text{H}$ [ppm] (Multiplicity, $J_{\text{HH}}$ [Hz]) | HMBC                                      |
|----------|-----------------------------|---------------------------------------------------------------|-------------------------------------------|
| 1        | 103.3                       | 4.97 (d, $J_{1,2} = 7.8$ )                                    | C-1'                                      |
| 2        | 73.9                        | 3.70 (t, $J_{2,3} = 8.0$ )                                    | C-1, C-3                                  |
| 3        | 83.3                        | 4.26 (m)                                                      |                                           |
| 4        | 70.8                        | 3.69 (m)                                                      | C-3, C-5, C-6                             |
| 5        | 74.6                        | 3.81 (m)                                                      | C-5, C-1''                                |
| 6a       | 64.0                        | 4.39 (dd, $J_{5,6a} = 7.0$ , $J_{6a,6b} = 11.6$ )             | C-5 (weak), C-1''                         |
| 6b       |                             | 4.70 (dd, $J_{5,6b} = 1.1$ )                                  | C-1''(weak)                               |
| 1'       | 151.6                       |                                                               |                                           |
| 2'       | 114.2                       | 6.96 (dd, $J_{2',3'} = 8.8$ , $J_{2',6'} = 2.0$ )             | C-1', C-4', C-6'                          |
| 3'       | 112.4                       | 7.16 (d)                                                      | C-1', C-5', C-6'(weak)                    |
| 4'       | 134.1                       |                                                               |                                           |
| 5'       | 128.5                       |                                                               |                                           |
| 6'       | 106.9                       | 7.28 (d)                                                      | C-1', C-2'(weak), C-4', C-9'              |
| 7'       |                             |                                                               |                                           |
| 8'       | 124.1                       | 7.04 (s)                                                      | C-1' (weak), C-4', C-5', C-6'(weak), C-9' |
| 9'       | 112.9                       |                                                               |                                           |
| 10'      | 25.7                        | 2.78 (t, $J_{10',11'} = 7.4$ )                                | C-5', C-8', C-9', C-11'                   |
| 11'      | 40.9                        | 3.37 (t)                                                      | C-9', C-10', C-13'                        |
| 12'      |                             |                                                               |                                           |
| 13'      | 172.7                       |                                                               |                                           |
| 14'      | 22.3                        | 1.89 (s)                                                      | C-13'                                     |
| 1''      | 168.3                       |                                                               |                                           |
| 2''      | 112.0                       |                                                               |                                           |
| 3''      | 150.4                       |                                                               |                                           |
| 4''      | 117.6                       | 6.79 (d, $J_{4'',5''} = 8.1$ )                                | C-2'', C-6''                              |
| 5''      | 134.8                       | 7.26 (m)                                                      | C-3'', C-7''                              |
| 6''      | 116.4                       | 6.58 (t, $J_{5'',6''} = 7.6$ )                                | C-2'', C-4'', C-7''(weak)                 |
| 7''      | 131.9                       | 7.79 (dd, $J_{5'',7''} = 1.0$ , $J_{6'',7''} = 7.9$ )         | C-1'', C-3'', C-5''                       |
| 8''      |                             |                                                               |                                           |

### 3. Chemical Syntheses

#### 3.1. Reagents and General Procedures

All oxygen and moisture-sensitive reactions were carried out under argon atmosphere in flame-dried glassware. Solutions and solvents sensitive to moisture and oxygen were transferred via standard syringe and cannula techniques. All commercial reagents were purchased as reagent grade and, unless otherwise stated, were purchased from Sigma-Aldrich and used without any further purification. Acetic acid (AcOH), acetonitrile (ACN), dichloromethane (DCM), ethyl acetate (EtOAc), *N,N*-dimethylformamide (DMF), tetrahydrofuran (THF), formic acid, hexanes and methanol (MeOH) used for chromatography and as a reagent or solvent were purchased from Thermo Fisher Scientific. Acetyl chloride ( $1\text{-}^{13}\text{C}$ , 99%) was purchased from Cambridge Isotope Laboratories, *N*-acetylserotonin (NAS) was obtained from Biosynth International, Boc-2-aminobenzoic acid (Boc-2-Abz-OH) was from Chem-Impex International, and trifluoroacetic acid (TFA) was from Tokyo Chemical Industry, fluoxetine hydrochloride was from Spectrum Chemical. Dichloromethane (DCM), and *N,N*-dimethylformamide (DMF) were dried with 3 Å molecular sieves prior to use. Thin-layer chromatography (TLC) was performed using J. T. Baker Silica Gel IB2F plates. Flash chromatography was performed using Teledyne Isco CombiFlash systems and Teledyne Isco RediSep Rf silica and C18 reverse phase columns. All deuterated solvents were purchased from Cambridge Isotopes. Abbreviations used: triethylamine (TEA), 2,3-dichloro-5,6-dicyano-1,4-benzoquinone (DDQ), trichloroacetonitrile ( $\text{CCl}_3\text{CN}$ ), 1,8-diazabicyclo[5.4.0]undec-7-ene (DBU), trifluoromethanesulfonate (TMSOTf), *N*-ethyl-*N'*-(3-dimethylaminopropyl)carbodiimide hydrochloride (EDC·HCl), 4-dimethylaminopyridine (DMAP), 1,3-dichloro-1,1,3,3-tetraisopropylidisiloxane (TIPDSiCl<sub>2</sub>), 3-chloroperoxybenzoic acid (*m*-CPBA). Nuclear Magnetic Resonance (NMR) spectra were recorded on Bruker INOVA 500 (500 MHz) and Varian INOVA 600 (600 MHz) spectrometers at Cornell University's NMR facility and Bruker AVANCE III HD 800 MHz (800 MHz) or Bruker AVANCE III HD 600 MHz (600 MHz) at SUNY ESF's NMR facility.  $^1\text{H}$  NMR chemical shifts are reported in ppm ( $\delta$ ) relative to residual solvent peaks (7.26 ppm for chloroform-*d*, 3.31 ppm for methanol-*d*<sub>4</sub>, 2.05 ppm for acetone-*d*<sub>6</sub>). NMR-spectroscopic data are reported as follows: chemical shift, multiplicity (s = singlet, d = doublet, t = triplet, q = quartet, m = multiplet, br = broad), coupling constants (Hz), and integration and often tabulated including 2D NMR data.  $^{13}\text{C}$  NMR chemical shifts are reported in ppm ( $\delta$ ) relative to residual solvent peaks (77.16 ppm for chloroform-*d*, 49.00 ppm for methanol-*d*<sub>4</sub>, 29.9 ppm for acetone-*d*<sub>6</sub>). All NMR data processing was done using MestreLab MNOVA version 14.2.1-27684 (<https://mestrelab.com/>).

### 3.2. Synthesis of acylated serotonin derivatives

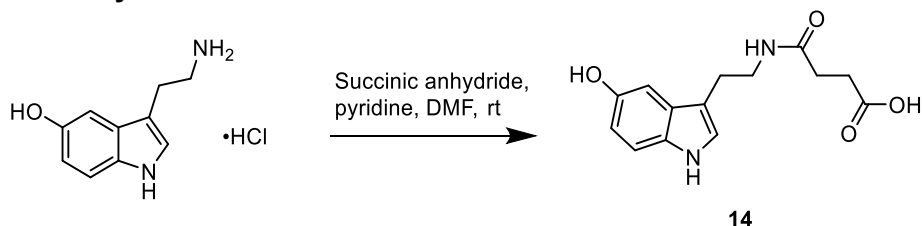

**4-((2-(5-hydroxy-1H-indol-3-yl)ethyl)amino)-4-oxobutanoic acid (**14**)**. To a solution of serotonin hydrochloride (128.1 mg, 0.602 mmol, 1.0 eq.) in DMF (6 mL) was added succinic anhydride (78.3 mg, 0.783 mmol, 1.3 eq.) and pyridine (0.6 mL). The mixture was stirred at room temperature for 24 hours and concentrated *in vacuo*. Flash column chromatography on silica using a gradient of 0-50% MeOH in DCM afforded **14** (165.4 mg, 99%) as clear oil.

**<sup>1</sup>H NMR (500 MHz, methanol-*d*<sub>4</sub>)**: δ (ppm) 7.16 (d, *J* = 8.6 Hz, 1H), 6.98 (s, 1H), 6.96 (d, *J* = 2.3 Hz, 1H), 6.69 (dd, *J* = 2.3, 8.6 Hz, 1H), 3.42 (t, *J* = 7.2 Hz, 2H), 2.83 (t, *J* = 7.2 Hz, 2H), 2.57 (t, *J* = 7.0 Hz, 2H), 2.43 (t, *J* = 7.0 Hz, 2H).

**<sup>13</sup>C NMR (125 MHz, methanol-*d*<sub>4</sub>)**: δ (ppm) 176.3, 174.3, 151.0, 132.9, 129.3, 124.3, 112.7, 112.4, 112.3, 103.5, 41.3, 31.5, 30.2, 26.1.

**HRMS (ESI)** *m/z* calcd for C<sub>14</sub>H<sub>16</sub>N<sub>2</sub>O<sub>4</sub> [*M* – H]<sup>–</sup> 275.1037, found 275.1043.

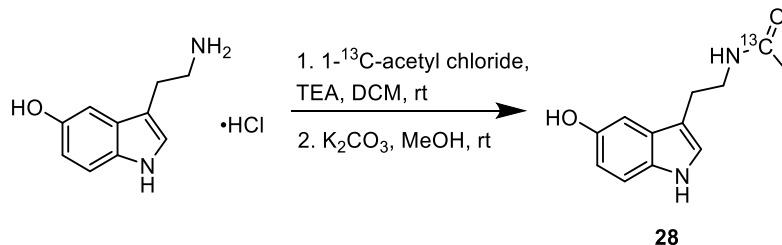

**N-(2-(5-hydroxy-1H-indol-3-yl)ethyl)acetamide-1-<sup>13</sup>C (**28**)**. To a suspension of serotonin hydrochloride (132 mg, 0.621 mmol, 1.0 eq.) in DCM (5 mL) was added TEA (433 μL, 3.10 mmol, 5.0 eq.). The stirred mixture was cooled to 0 °C before 1-<sup>13</sup>C-acetyl chloride (93 μL, 1.30 mmol, 2.1 eq.) was added. The mixture was slowly warmed to room temperature and stirred for 24 hours. The reaction mixture was then diluted with DCM, the organics were washed with water, dried with Na<sub>2</sub>SO<sub>4</sub>, and concentrated *in vacuo*. Crude intermediates were dissolved in MeOH (10 mL), and K<sub>2</sub>CO<sub>3</sub> (85.8 mg, 0.621 mmol, 1.0 eq.) was added. The reaction was stirred at room temperature for 2 hours and concentrated to 2 mL *in vacuo*. The residue was diluted with water and extracted with EtOAc twice. The organics were separated, washed with brine, and dried with Na<sub>2</sub>SO<sub>4</sub>. Flash column chromatography on silica using a gradient of 0-50% MeOH in DCM afforded **28** (98.0 mg, 72%) as light-yellow oil.

**<sup>1</sup>H NMR (600 MHz, methanol-*d*<sub>4</sub>)**: δ (ppm) 7.15 (dd, *J* = 0.6, 8.6 Hz, 1H), 6.99 (s, 1H), 6.93 (dd, *J* = 0.6, 2.4 Hz, 1H), 6.66 (dd, *J* = 2.4, 8.6 Hz, 1H), 3.42 (ddd, *J* = 3.7, 7.3, 8.2 Hz, 2H), 2.85 (dt, *J* = 0.6, 7.3 Hz, 2H), 1.91 (d, *J* = 6.1 Hz, 3H). **<sup>13</sup>C NMR (125 MHz, methanol-*d*<sub>4</sub>)**: δ (ppm) 175.9

(<sup>12</sup>C), 173.4(<sup>13</sup>C), 151.1, 133.1, 129.5, 124.2, 112.6, 112.4, 103.5, 41.4, 26.2, 22.6 (d, *J* = 50.3 Hz).

**HRMS (ESI)** *m/z* calcd for C<sub>11</sub><sup>13</sup>CH<sub>14</sub>N<sub>2</sub>O<sub>2</sub> [M + H]<sup>+</sup> 220.1161, found 220.1160.

### 3.3. Synthesis of compound 36

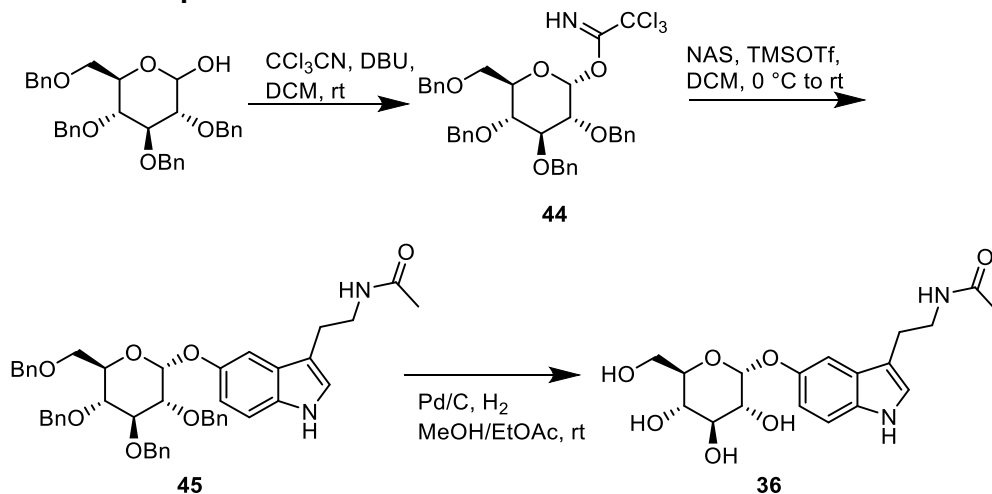

***N*-(2-(5-(((2*R*,3*R*,4*S*,5*R*,6*R*)-3,4,5-tris(benzyloxy)-6-((benzyloxy)methyl)tetrahydro-2*H*-pyran-2-yl)oxy)-1*H*-indol-3-yl)ethyl)acetamide (45).** To a solution of 2,3,4,6-tetra-*O*-benzyl-D-glucopyranose (412 mg, 0.761 mmol, 1.0 eq.) in DCM (2 mL) was added trichloroacetonitrile

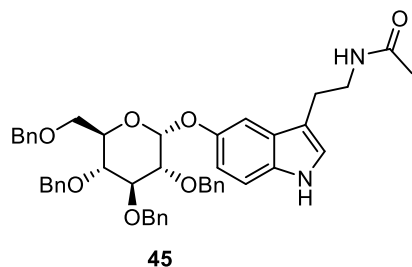

(152  $\mu$ L, 1.52 mmol, 2.0 eq.) and DBU (21  $\mu$ L, 0.152 mmol, 0.2 eq.) under argon. The mixture was stirred at room temperature for 1.5 hours and concentrated *in vacuo*. Flash column chromatography on silica using a gradient of 25% ethyl acetate in hexanes afforded intermediate **44** (502.4 mg, 97%) as clear oil. A well-stirred solution of **44** (502.4 mg, 0.745 mmol, 2.0 eq.) and *N*-acetylserotonin (806 mg, 0.368 mmol, 1.0 eq.) in DCM (4 mL) and DMF (0.8 mL) was cooled

to 0  $^{\circ}$ C, followed by addition of TMSOTf (66  $\mu$ L, 0.368 mmol, 1.0 eq.), and the solution was allowed to warm to room temperature within 30 minutes. After stirring at 45  $^{\circ}$ C for 18 hours, the mixture was concentrated *in vacuo*. Flash column chromatography on silica using a gradient of 0-15% MeOH in DCM afforded **45** (59.7 mg, 22%) as clear oil.

**<sup>1</sup>H NMR (500 MHz, chloroform-*d*):**  $\delta$  (ppm) 7.41-7.26 (m, 20H), 7.17-7.14 (m, 2H), 7.04-7.01 (m, 2H), 5.50 (d, *J* = 3.4 Hz, 1H), 5.44 (m, 1H), 5.08 (d, *J* = 10.8 Hz, 1H), 4.90 (d, *J* = 11.0 Hz, 1H), 4.88 (d, *J* = 10.9 Hz, 1H), 4.81 (d, *J* = 12.0 Hz, 1H), 4.72 (d, *J* = 12.0 Hz, 1H), 4.57 (d, *J* = 11.9 Hz, 1H), 4.50 (d, *J* = 10.8 Hz, 1H), 4.41 (d, *J* = 12.0 Hz, 1H), 4.25 (t, *J* = 9.2 Hz, 1H), 4.03 (m, 1H), 3.78-3.71 (m, 3H), 3.62 (dd, *J* = 1.9, 10.8 Hz, 1H), 3.53 (dt, *J* = 6.2, 6.6 Hz, 2H), 2.87 (t, *J* = 6.6 Hz, 2H), 1.90 (s, 3H). **<sup>13</sup>C NMR (125 MHz, chloroform-*d*):**  $\delta$  (ppm) 170.1, 151.2, 139.0, 138.4, 138.2, 138.0, 132.7, 128.62, 128.58, 128.54, 128.48, 128.19, 128.13, 128.05, 128.02,

127.87, 127.82, 127.78, 123.1, 114.3, 113.2, 111.9, 105.8, 96.8, 82.2, 80.0, 77.8, 76.0, 75.3, 75.5, 10.8, 68.7, 39.6, 25.4, 23.5.

***N*-(2-(5-(((2*R*,3*R*,4*S*,5*S*,6*R*)-3,4,5-trihydroxy-6-(hydroxymethyl)tetrahydro-2*H*-pyran-2-yl)oxy)-1*H*-indol-3-yl)ethyl)acetamide (**36**).** To a solution of **45** (59.2 mg, 0.080 mmol, 1.0 eq.)

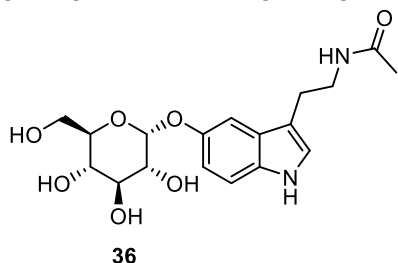

in a mixture of MeOH and EtOAc (3 mL, v/v = 1:1) was added Pd/C (10% w/w, 38 mg). The stirred reaction mixture was purged with argon for 5 minutes, flushed with hydrogen and then subjected to a hydrogen atmosphere for 2 hours at room temperature, and again purged with argon for 5 minutes. The mixture was filtered through celite and concentrated *in vacuo*, affording **36** as clear oil (29.8 mg, 98%).

See Supplementary Table 4 for NMR spectroscopic data of **36**.

**HRMS (ESI)** *m/z* calcd for C<sub>18</sub>H<sub>24</sub>N<sub>2</sub>O<sub>7</sub> [M + Na]<sup>+</sup> 403.1476, found 403.1486.

### 3.4. Synthesis of sngl#101 (37)

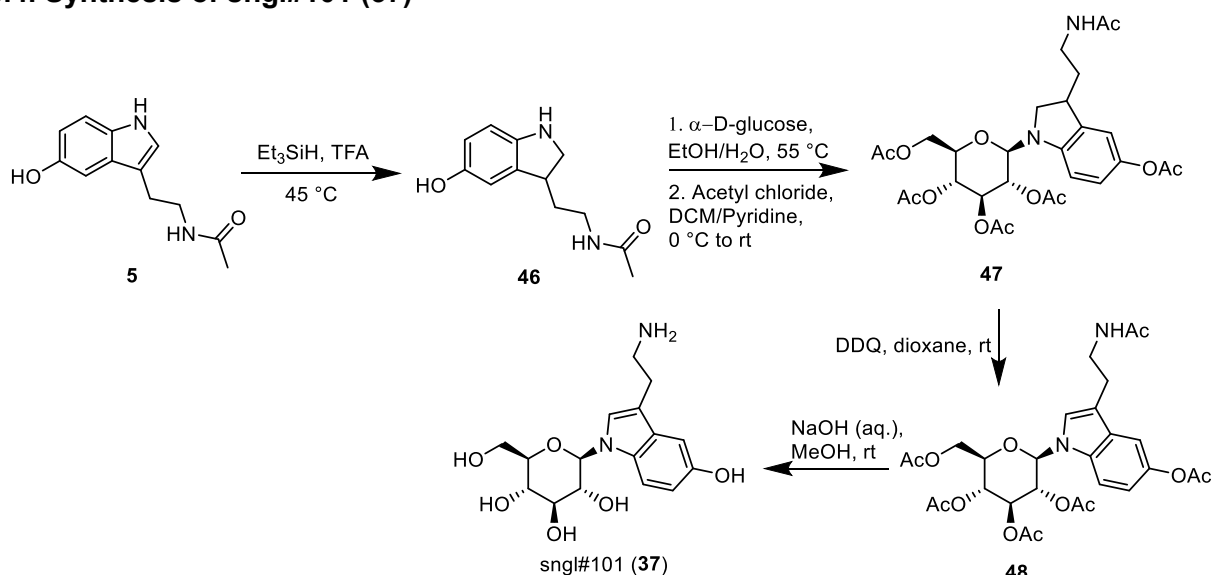

**N-(2-(5-hydroxyindolin-3-yl)ethyl)acetamide (46)** To a solution of *N*-acetylserotonin (210.2 mg, 0.963 mmol, 1.0 eq.) in TFA (4 mL) was added triethylsilane (185  $\mu$ L, 1.15 mmol, 1.2 eq.). The mixture was stirred at 45 °C for 4 hours and concentrated *in vacuo*. Flash column chromatography on silica using a gradient of 0-40% MeOH in DCM afforded **46** (209.0 mg, 99%).

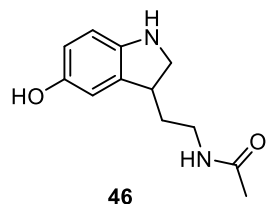

**<sup>1</sup>H NMR (500 MHz, methanol-*d*<sub>4</sub>)**:  $\delta$  (ppm) 7.17 (d, *J* = 8.6 Hz, 1H), 6.79 (d, *J* = 2.2 Hz, 1H), 6.74 (dd, *J* = 2.2, 8.6 Hz, 1H), 3.95-3.88 (m, 1H), 3.62-3.55 (m, 1H), 3.49-3.42 (m, 2H), 3.29-3.20 (m, 2H), 2.02-1.94 (m, 1H), 1.88 (s, 3H), 1.72-1.63 (m, 1H). **<sup>13</sup>C NMR (125 MHz, methanol-*d*<sub>4</sub>)**:  $\delta$  (ppm) 173.5 (br), 160.2, 141.3, 128.5, 120.1, 116.6, 112.7, 52.5, 40.6, 38.0, 34.5, 22.5.

**HRMS (ESI)** *m/z* calcd for C<sub>12</sub>H<sub>16</sub>N<sub>2</sub>O [M + H]<sup>+</sup> 221.1284, found 221.1272.

#### (2*R*,3*R*,4*S*,5*R*,6*R*)-2-(3-(2-acetamidoethyl)-5-acetoxyindolin-1-yl)-6-

#### (acetoxymethyl)tetrahydro-2*H*-pyran-3,4,5-triyl triacetate (47).

To a solution of **46** (209 mg, 0.953 mmol, 1.0 eq.) in TFA (1.5 mL) was added  $\alpha$ -D-glucose (867 mg, 4.82 mmol, 5.0 eq.). The mixture was refluxed for 2 hours and concentrated *in vacuo*. The crude intermediate was redissolved in pyridine (15 mL) and acetic anhydride (8 mL, 86.7 mmol, 90 eq.) was added. The resulting mixture was stirred at room temperature for 1 hour and then diluted with water and extracted with DCM: MeOH (v/v = 95:5) for three

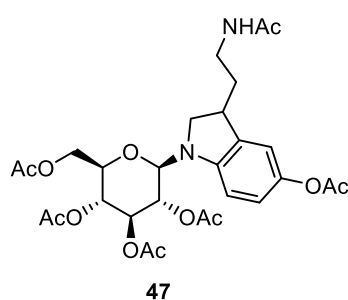

times. The combined organics were washed with sat. aq.  $\text{NaHCO}_3$  and brine and dried with  $\text{Na}_2\text{SO}_4$ . Flash column chromatography on silica using a gradient of 0-30% isopropanol in toluene afforded **47** (mixture of diastereomers, 19.5 mg, 3.8%) as yellow oil.

**$^1\text{H}$  NMR (600 MHz, chloroform-*d*):**  $\delta$  (ppm) 6.86-6.78 (m, 2H), 6.52 (d,  $J$  = 8.4 Hz, 0.5H), 6.50 (d,  $J$  = 8.5 Hz, 0.5H), 5.67 (m, 0.5H), 5.57 (m, 0.5H), 5.33 (dt,  $J$  = 6.7, 9.4 Hz, 1H), 5.23 (dt,  $J$  = 8.2, 9.2 Hz, 1H), 5.07 (td,  $J$  = 3.3, 9.7 Hz, 1H), 4.91 (d,  $J$  = 10.0 Hz, 1H), 4.25 (ddd,  $J$  = 5.0, 10.9, 12.4 Hz, 1H), 4.04 (ddd,  $J$  = 2.4, 12.3, 17.5 Hz, 1H), 3.77-3.71 (m, 2H), 3.34-3.28 (m, 3H), 3.21 (m, 1H), 2.35 (s, 3H), 2.04 (d,  $J$  = 1.7 Hz, 3H), 2.03 (d,  $J$  = 1.7 Hz, 3H), 2.01-1.98 (6H), 1.94 (d,  $J$  = 11.8 Hz, 3H), 1.76-1.62 (m, 2H).

**HRMS (ESI)**  $m/z$  calcd for  $\text{C}_{28}\text{H}_{36}\text{N}_2\text{O}_{12}$  [ $M + H$ ] $^+$  593.2341, found 593.2299.

**(2*R*,3*R*,4*S*,5*R*,6*R*)-2-(3-(2-acetamidoethyl)-5-acetoxy-1*H*-indol-1-yl)-6-**

**(acetoxymethyl)tetrahydro-2*H*-pyran-3,4,5-triyl triacetate (**48**).** To a solution of **47** (19.5 mg, 0.0324 mmol, 1.0 eq.) in 1,4-dioxane (1 mL) was added DDQ (8.8 mg, 0.039 mmol, 1.2 eq.),

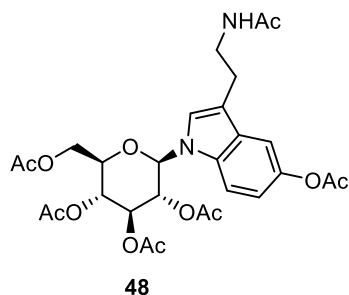

and the mixture was stirred at room temperature. After 1.5 hours, the reaction mixture was cooled to 0 °C ice bath, diluted with sat. aq.  $\text{NaHCO}_3$ , and extracted with EtOAc for three times. Combined organics were washed with brine, dried with  $\text{Na}_2\text{SO}_4$ , and then concentrated *in vacuo*. Flash column chromatography on silica using 100% DCM afforded **48** (15.2 mg, 79%).

**$^1\text{H}$  NMR (600 MHz, chloroform-*d*):**  $\delta$  (ppm) 7.31 (d,  $J$  = 8.9 Hz, 1H), 7.23 (d,  $J$  = 2.1 Hz, 1H), 7.15 (s, 1H), 6.98 (dd,  $J$  = 2.1, 8.9 Hz, 1H), 5.91 (m, 1H), 5.53 (d,  $J$  = 9.0 Hz, 1H), 5.46 (t,  $J$  = 9.5 Hz, 1H), 5.35 (t,  $J$  = 9.4 Hz, 1H), 5.25 (t,  $J$  = 9.8 Hz, 1H), 4.32 (dd,  $J$  = 5.0, 12.6 Hz, 1H), 4.16 (dd,  $J$  = 2.1, 12.6 Hz, 1H), 4.11 (q,  $J$  = 7.2 Hz, 1H), 4.01 (ddd,  $J$  = 2.2, 5.0, 10.2 Hz, 1H), 3.67 (m, 1H), 3.42 (m, 1H), 2.93 (m, 1H), 2.81 (m, 1H), 2.31 (s, 3H), 2.084 (s, 3H), 2.078 (s, 3H), 2.02 (s, 3H), 1.94 (s, 3H), 1.55 (s, 3H).  **$^{13}\text{C}$  NMR (125 MHz, chloroform-*d*):**  $\delta$  (ppm) 170.7, 170.6, 170.4, 170.1, 169.6, 169.2, 144.9, 134.6, 128.8, 123.6, 117.1, 115.7, 111.8, 109.8, 83.0, 75.0, 72.8, 71.5, 68.3, 62.0, 51.0, 39.1, 23.3, 21.3, 20.9, 20.73, 20.70, 20.2.

**HRMS (ESI)**  $m/z$  calcd for  $\text{C}_{28}\text{H}_{34}\text{N}_2\text{O}_{12}$  [ $M + H$ ] $^+$  591.2184, found 591.2151.

***N*-(2-(5-hydroxy-1-((2*R*,3*R*,4*S*,5*S*,6*R*)-3,4,5-trihydroxy-6-(hydroxymethyl)tetrahydro-2*H*-pyran-2-yl)-1*H*-indol-3-yl)ethyl)acetamide (sngl#101, **37**).** To a solution of **48** (15.2 mg, 0.0257 mmol, 1.0 eq.) in MeOH (1.5 mL) was added 8% NaOH (0.3 mL). The mixture was stirred at room temperature for 25 min. and concentrated *in vacuo*. Flash column chromatography on silica using a gradient of 0-90% MeOH in DCM afforded **37** as clear oil (5.7 mg,

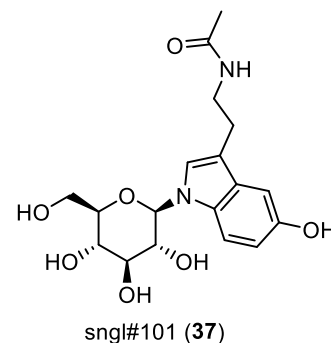

58%).

See Supplementary Table 5 for NMR spectroscopic data of sngl#101 (**37**).

**HRMS (ESI)**  $m/z$  calcd for  $C_{18}H_{24}N_2O_7$   $[M + Na]^+$  403.1476, found 403.1471.

### 3.5. Synthesis of sngl#1-4

**(2*R*,3*R*,4*S*,5*S*,6*R*)-2-fluoro-6-(hydroxymethyl)tetrahydro-2*H*-pyran-3,4,5-triol (**38**).** **38** was prepared as previously described<sup>4,5</sup>.

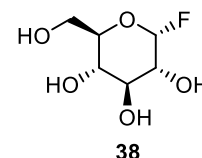

***N*-(2-(5-(((2*S*,3*R*,4*S*,5*S*,6*R*)-3,4,5-trihydroxy-6-(hydroxymethyl)tetrahydro-2*H*-pyran-2-yl)oxy)-1*H*-indol-3-yl)ethyl)acetamide (sngl#1, **29**).** To a 20 mL glass vial containing **38** (1.52 g, 8.35 mmol, 3 eq.), *N*-acetylserotonin (607 mg, 2.78 mmol, 1.0 eq.) and  $Ca(OH)_2$  (618 mg, 8.35 mmol, 3 eq.) was added water (3 mL). The reaction mixture was stirred vigorously for 35 minutes. The crude mixture was purified by reversed-phase flash chromatography with a C18 column using a gradient of 0-40% MeOH in  $H_2O$ , which afforded sngl#1 (**29**, 779.0 mg, 74%) as a white solid.

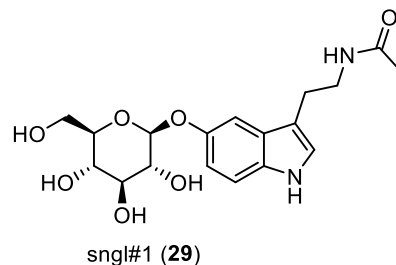

See Supplementary Table 6 for NMR spectroscopic data of sngl#1 (**29**).

**HRMS (ESI)**  $m/z$  calcd for  $C_{18}H_{24}N_2 NaO_7^+$   $[M + Na]^+$  403.1476, found 403.1485.

**((2*R*,3*S*,4*S*,5*R*,6*S*)-6-((3-(2-acetamidoethyl)-1*H*-indol-5-yl)oxy)-3,4,5-trihydroxytetrahydro-2*H*-pyran-2-yl)methyl 2-aminobenzoate (sngl#3, **31**).** To a mixture

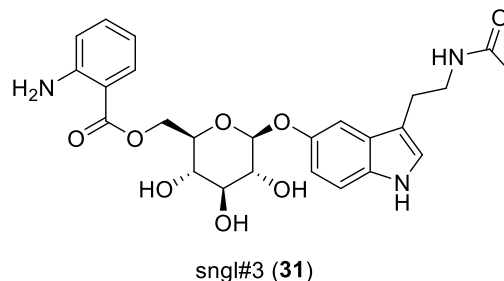

of DCM/DMF (3 mL, v/v = 1:2) was added Boc-2-aminobenzoic acid (15.4 mg, 0.065 mmol, 1.2 eq.) and EDC·HCl (31.2 mg, 0.163 mmol, 3.0 eq.). The mixture was stirred at room temperature for 30 minutes, and

DMAP (26.5 mg, 0.217 mmol, 4.0 eq.) and sngl#1 (**29**, 20.6 mg, 0.0542 mmol, 1.0 eq.) were added. After 5 days, the reaction mixture was concentrated *in vacuo*. Flash column chromatography on silica using a gradient of 0-30% MeOH in DCM afforded intermediate **49** (4.1 mg, 13%). Intermediate **49** was redissolved in DCM (1 mL), followed by slow addition of TFA (0.1 mL). The reaction mixture was stirred at room temperature for 1.5 hours and

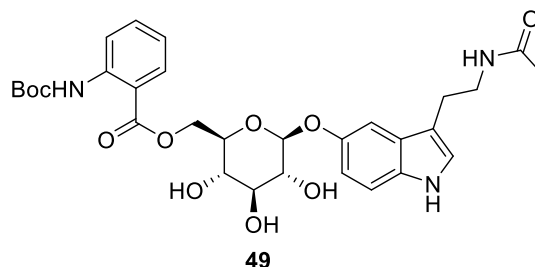

concentrated *in vacuo*. Preparative HPLC provided a pure sample of sngl#3 (**31**, 0.3 mg, 1.1 %).

See Supplementary Table 8 for NMR spectroscopic data of sngl#3 (**31**).

**HRMS (ESI)**  $m/z$  calcd for  $C_{25}H_{29}N_3O_8$   $[M + H]^+$  500.2027, found 500.2005.

***N*-(2-(5-(((6*aR*,8*S*,9*R*,10*R*,10*aS*)-9,10-dihydroxy-2,2,4,4-tetraisopropylhexahydropyrano[3,2-*f*][1,3,5,2,4]trioxadisilocin-8-yl)oxy)-1*H*-indol-3-yl)ethyl)acetamide (**50**)**. To a solution of sngl#1 (**29**, 194 mg, 0.511 mmol, 1.0 eq.) in DMF was added imidazole (152 mg, 1.84 mmol, 4.4 eq.) was cooled to 0 °C before TIPDSiCl<sub>2</sub> (228 μL, 0.713 mmol, 1.4 eq.) was added. The reaction mixture was allowed to warm to room temperature over 1.5 hours and stirred for another 30 minutes. The mixture was then diluted with DCM and quenched with water. The organics were washed with sat. aq. NaHCO<sub>3</sub>, dried with Na<sub>2</sub>SO<sub>4</sub>, and concentrated *in vacuo*. Flash column chromatography on silica using a gradient of 0-10% MeOH in DCM afforded **50** as a white solid (227.6 mg, 72%).

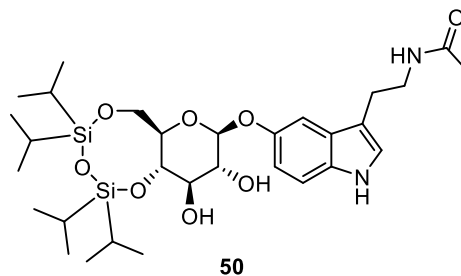

**<sup>1</sup>H NMR (500 MHz, chloroform-*d*)**: δ (ppm) 8.16 (s, 1H), 7.25-7.20 (m, 2H), 7.04-6.95 (m, 2H), 4.89 (d,  $J$  = 7.3 Hz, 1H), 4.13 (d,  $J$  = 11.9 Hz, 1H), 4.01 (d,  $J$  = 12.5 Hz, 1H), 3.93 (t,  $J$  = 8.9 Hz, 1H), 3.75-3.64 (m, 2H), 3.52 (m, 2H), 3.36 (m, 1H), 3.88 (m, 2H), 1.94 (s, 3H), 1.10-0.99 (m, 28H).

**HRMS (ESI)**  $m/z$  calcd for  $C_{30}H_{50}N_2O_8Si_2$ ,  $[M + H]^+$  623.3178, found 623.3157.

**(6*aR*,8*S*,9*R*,10*R*,10*aS*)-8-((3-(2-acetamidoethyl)-1*H*-indol-5-yl)oxy)-10-hydroxy-2,2,4,4-tetraisopropylhexahydropyrano[3,2-*f*][1,3,5,2,4]trioxadisilocin-9-yl benzyl carbonate (**51**)**. To a solution of **50** (227 mg, 0.365 mmol, 1.0 eq.) in DCM was added DMAP (147 mg, 1.20 mmol, 3.3 eq.) and DMF (50 μL). The mixture was cooled to 0 °C before added benzyl chloroformate (233 μL, 1.64 mmol, 4.5 eq.). The reaction mixture was allowed to warm to room temperature within 30 minutes and stirred for another 1.3 hours. The mixture was diluted with DCM and then quenched with water. The aqueous layer was separated and extracted with DCM for three times. The combined organics were washed with sat. aq. NaHCO<sub>3</sub> and brine, dried with Na<sub>2</sub>SO<sub>4</sub>, and concentrated *in vacuo*. Flash column chromatography of the residue on silica using a gradient of 0-20% isopropanol in toluene afforded **51** as a white solid (196.1 mg, 66%).

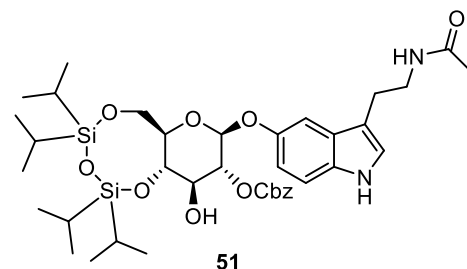

**<sup>1</sup>H NMR (600 MHz, chloroform-*d*)**: δ (ppm) 8.22 (s, 1H), 7.40-7.37 (m, 2H), 7.36-7.31 (m, 3H), 7.19-7.16 (m, 2H), 6.99 (s, 1H), 6.82 (dd,  $J$  = 2.2, 8.7 Hz, 1H), 5.64 (m, 1H), 5.26 (d,  $J$  = 12.1 Hz,

1H), 5.21 (d,  $J = 12.1$  Hz, 1H), 4.97 (d,  $J = 8.0$  Hz, 1H), 4.93 (dd,  $J = 8.7, 9.3$  Hz, 1H), 4.12 (dd,  $J = 1.9, 12.7$  Hz, 1H), 4.05 (dd,  $J = 1.2, 12.7$  Hz, 1H), 3.98 (t,  $J = 1.2, 9.3$  Hz, 1H), 3.81 (t,  $J = 1.2, 9.1$  Hz, 1H), 3.51-3.47 (m, 2H), 3.34 (dt,  $J = 1.2, 9.4$  Hz, 1H), 2.83 (t,  $J = 6.6$  Hz, 2H), 1.88 (s, 3H), 1.14-1.01 (m, 28H).  **$^{13}\text{C}$  NMR (125 MHz, chloroform-*d*):**  $\delta$  (ppm) 170.5, 155.1, 151.7, 135.2, 133.1, 128.74, 128.68, 128.48, 128.35, 127.8, 126.4, 114.5, 113.0, 111.8, 106.6, 101.5, 77.9, 76.7, 75.2, 70.2, 69.7, 60.9, 39.8, 25.2, 23.3, 17.57, 17.47, 17.43, 17.37, 17.33, 17.31, 17.25, 13.7, 13.3, 12.7, 12.6.

**HRMS (ESI)**  $m/z$  calcd for  $\text{C}_{38}\text{H}_{56}\text{N}_2\text{O}_{10}\text{Si}_2$  [ $\text{M} + \text{H}$ ] $^+$  757.3546, found 757.3517.

**(6a*R*,8*S*,9*R*,10*R*,10a*R*)-8-((3-(2-acetamidoethyl)-1*H*-indol-5-yl)oxy)-10-((bis(benzyloxy)phosphoryl)oxy)-2,2,4,4-tetraisopropylhexahydropyrano[3,2-*f*][1,3,5,2,4]trioxadisilocin-9-yl benzyl carbonate (52).**

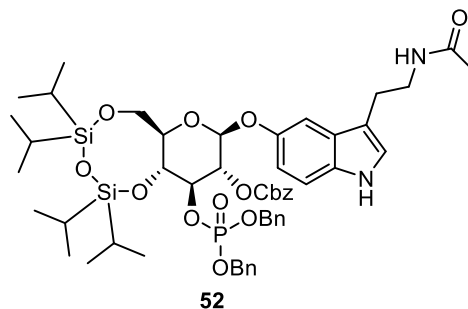

To a solution of **51** (145.8 mg, 0.188 mmol, 1.0 eq.) in DCM was added dibenzyl *N,N*-diisopropylphosphoramidite (221  $\mu\text{L}$ , 0.659 mmol, 3.5 eq.) and 1*H*-tetrazole (0.45 M in ACN, 1.5 mL, 0.659 mmol, 3.5 eq.). The reaction mixture was stirred at room temperature for 1 hour. The solution was cooled to  $-78$   $^{\circ}\text{C}$  under argon, and *m*-CPBA ( $\leq 77\%$ , 143.0 mg, 0.638 mmol, 3.4 eq.) in DCM (1.5 mL) was added slowly to the reaction mixture. The solution was stirred at  $-78$   $^{\circ}\text{C}$  for 0.5 hour, and slowly warmed to room temperature and reacted for another 1 hour, then was diluted with DCM and washed with 10%  $\text{Na}_2\text{SO}_4$  twice, sat. aq.  $\text{NaHCO}_3$ , and brine, dried with  $\text{Na}_2\text{SO}_4$ , and concentrated *in vacuo*. Flash column chromatography on silica using a gradient of 5-100% EtOAc in hexanes afforded **52** as a white solid (141.3 mg, 74%).

**$^1\text{H}$  NMR (500 MHz, chloroform-*d*):**  $\delta$  (ppm) 8.31 (s, 1H), 7.36-7.27 (m, 15H), 7.22-7.18 (m, 2H), 7.04 (d,  $J = 2.2$  Hz, 1H), 6.78 (dd,  $J = 2.2, 8.7$  Hz, 1H), 5.53 (m, 1H), 5.23 (d,  $J = 12.2$  Hz, 1H), 5.13 (dd,  $J = 8.0, 9.4$  Hz, 1H), 5.08-4.91 (m, 6H), 4.61 (dt,  $J = 8.6, 8.9$  Hz, 1H), 4.20-4.14 (m, 2H), 4.09 (d,  $J = 12.6$  Hz, 1H), 3.59-3.47 (m, 2H), 3.33 (dt,  $J = 1.7, 9.4$  Hz, 1H), 2.87 (t,  $J = 6.6$  Hz, 2H), 1.92 (s, 3H), 1.16-0.99 (m, 28H).  **$^{13}\text{C}$  NMR (125 MHz, chloroform-*d*):** 170.2, 154.6, 151.7, 136.14, 136.08, 135.90, 135.85, 135.3, 133.2, 128.60, 128.57, 128.53, 128.49, 128.36, 128.12, 128.06, 127.8, 123.3, 114.6, 113.1, 111.8, 106.8, 101.6, 80.3 (d,  $J = 6.5$  Hz), 76.6 (d,  $J = 4.6$  Hz), 70.0, 69.6 (t,  $J = 5.9$  Hz), 68.7 (d,  $J = 5.2$  Hz), 60.9, 39.8, 25.3, 23.5, 17.54, 17.50, 17.46, 17.41, 17.36, 17.34, 17.28, 17.11, 13.35, 13.26, 12.97, 12.95.

**HRMS (ESI)**  $m/z$  calcd for  $\text{C}_{52}\text{H}_{69}\text{N}_2\text{O}_{13}\text{PSi}_2$  [ $\text{M} + \text{H}$ ] $^+$  1017.4149, found 1017.4105.

**(2S,3R,4S,5R,6R)-2-((3-(2-acetamidoethyl)-1H-indol-5-yl)oxy)-4-((bis(benzyloxy)phosphoryl)oxy)-5-hydroxy-6-(hydroxymethyl)tetrahydro-2H-pyran-3-yl benzyl carbonate (53).**

To a solution of **52** (141.3 mg, 0.139 mmol, 1.0 eq.) in THF (6 mL) was added acetic acid (24  $\mu$ L, 0.417 mmol, 3.0 eq.). The solution was cooled to -10  $^{\circ}$ C before tetrabutylammonium fluoride solution (1M in THF, 417  $\mu$ L, 0.417 mmol, 3.0 eq.) was added. The reaction mixture was stirred for 1.5 hours in cold and concentrated *in vacuo*. Flash column chromatography on silica using a gradient of 0-15% MeOH in DCM afforded **53** as a white solid (92.3 mg, 86%).

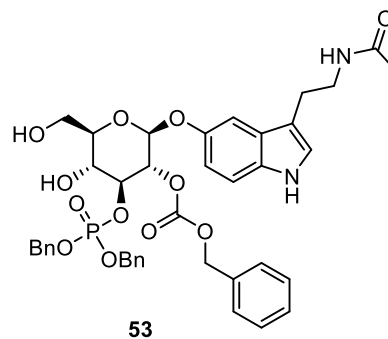

**$^1\text{H}$  NMR (500 MHz, chloroform-*d*):**  $\delta$  (ppm) 8.32 (s, 1H), 7.36-7.21 (m, 15H), 7.14 (d,  $J$  = 8.7 Hz, 1H), 6.96 (d,  $J$  = 2.1 Hz, 1H), 6.71 (dd,  $J$  = 2.1, 8.7 Hz, 1H), 5.82 (m, 1H), 5.12 (d,  $J$  = 12.2 Hz, 1H), 5.10-4.94 (m, 7H), 4.49 (dt,  $J$  = 7.2, 8.9 Hz, 1H), 3.99 (dd,  $J$  = 2.8, 12.2 Hz, 1H), 3.84-3.74 (m, 2H), 3.55-3.46 (m, 2H), 3.40 (m, 1H), 2.91-2.77 (m, 2H), 1.89 (s, 3H).  **$^{13}\text{C}$  NMR (125 MHz, chloroform-*d*):**  $\delta$  (ppm) 171.1, 154.5, 151.2, 135.0, 133.1, 128.81, 128.75, 128.72, 128.71, 128.69, 128.66, 123.4, 114.2, 113.1, 111.8, 106.9, 100.6, 81.7 (d,  $J$  = 5.6 Hz), 76.17, 76.0 (d,  $J$  = 6.2 Hz), 70.4, 70.25 (d,  $J$  = 6.0 Hz), 70.17, 70.13 (d,  $J$  = 6.0 Hz), 62.3, 40.3, 25.4, 23.4.

**HRMS (ESI)**  $m/z$  calcd for  $\text{C}_{40}\text{H}_{43}\text{N}_2\text{O}_{12}\text{P}$  [ $\text{M} - \text{H}$ ] $^-$  773.2481, found 773.2488.

**(2S,3R,4S,5R,6R)-2-((3-(2-acetamidoethyl)-1H-indol-5-yl)oxy)-3,5-dihydroxy-6-(hydroxymethyl)tetrahydro-2H-pyran-4-yl dihydrogen phosphate (30)**

To a solution of **53** (26.9 mg, 0.0347 mmol, 1.0 eq.) in a mixture of MeOH and EtOAc (2 mL, v/v = 1:1) was added Pd/C (10% w/w, 18 mg). The reaction mixture was purged with argon for 5 minutes, flushed with hydrogen, and then subjected to hydrogen atmosphere for 1.5 hours at room temperature, and subsequently again purged with argon for 5 minutes. The mixture was filtered through celite and concentrated *in vacuo*. The crude mixture was purified by reversed-phase flash chromatography with a C18 column using a gradient of 0-10% ACN in  $\text{H}_2\text{O}$  with 0.1% formic acid, which afforded sngl#2 as a clear oil (**30**, 9.3 mg, 58%).

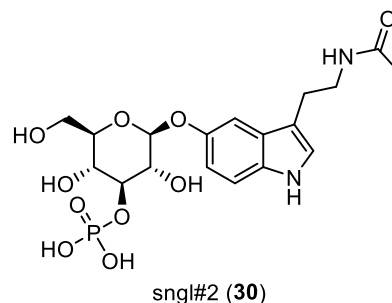

See Supplementary Table 7 for NMR spectroscopic data of sngl#2 (**30**).

**HRMS (ESI)**  $m/z$  calcd for  $\text{C}_{18}\text{H}_{25}\text{N}_2\text{O}_{10}\text{P}$  [ $\text{M} - \text{H}$ ] $^-$  459.1174, found 459.1185.

**((2R,3R,4S,5R,6S)-6-((3-(2-acetamidoethyl)-1H-indol-5-yl)oxy)-5-(((benzyloxy)carbonyl)oxy)-4-(((bis(benzyloxy)phosphoryl)oxy)-3-hydroxytetrahydro-2H-pyran-2-yl)methyl 2-(((tert-butoxycarbonyl)amino)benzoate (54).**

To a mixture of dry DCM/DMF (2 mL, v/v = 100:1) was added Boc-2-aminobenzoic acid (70.7 mg, 0.298 mmol, 2.5 eq.) and EDC·HCl (68.4 mg, 0.444 mmol, 3.0 eq.). The mixture was stirred at room temperature for 25 minutes, and DMAP (58.2 mg, 0.476 mmol, 4.0 eq.) and **53** (92.3 mg, 0.119 mmol, 1.0 eq.) were added. After 25 hours, the reaction mixture was concentrated *in vacuo*. Flash column chromatography on silica using a gradient of 0-12% MeOH in DCM afforded **54** as a white solid (72.0 mg, 61%).

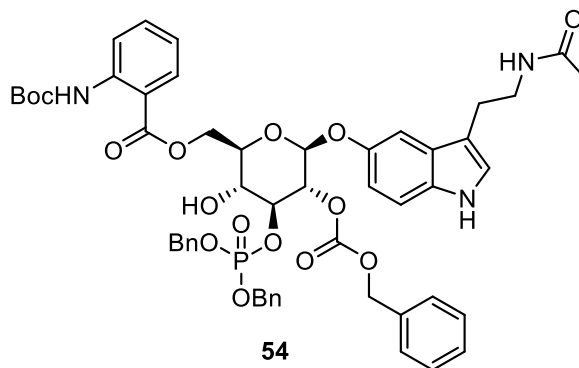

**<sup>1</sup>H NMR (600 MHz, chloroform-*d*):** δ (ppm) 8.42 (d, *J* = 8.4 Hz, 1H), 7.97 (dd, *J* = 1.1, 8.0 Hz, 1H), 7.49 (dd, *J* = 1.1, 7.8 Hz, 1H), 7.33-7.15 (m, 16H), 7.09 (d, *J* = 8.7 Hz, 1H), 7.00 (d, *J* = 1.1 Hz, 1H), 6.91 (t, *J* = 7.8 Hz, 1H), 6.82 (dd, *J* = 2.0, 8.7 Hz, 1H), 5.61 (m, 1H), 5.15-4.95 (m, 8H), 4.71 (dd, *J* = 2.0, 12.0 Hz, 1H), 4.56 (dd, *J* = 6.1, 12.0 Hz, 1H), 4.49 (m, 1H), 3.84 (t, *J* = 9.4 Hz, 1H), 3.77 (m, 1H), 3.49-3.44 (m, 2H), 2.75 (t, *J* = 6.9 Hz, 2H), 1.90 (s, 3H), 1.50 (s, 9H).

**HRMS (ESI)** *m/z* calcd for C<sub>52</sub>H<sub>56</sub>N<sub>3</sub>O<sub>15</sub>P [M + H]<sup>+</sup> 994.3522, found 994.3489.

**((2R,3R,4S,5R,6S)-6-((3-(2-acetamidoethyl)-1H-indol-5-yl)oxy)-5-(((benzyloxy)carbonyl)oxy)-4-(((bis(benzyloxy)phosphoryl)oxy)-3-hydroxytetrahydro-2H-pyran-2-yl)methyl 2-aminobenzoate (55).**

To a solution of **54** (72.0 mg, 72.5 μmol, 1.0 eq.) in DCM (2 mL) was added TFA (200 μL). The yellow mixture was stirred at room temperature for 1 hour and turned purple. The reaction mixture was then concentrated *in vacuo*. Flash column chromatography on silica using a gradient of 0-10% MeOH in DCM afforded **55** (54.9 mg, 85%).

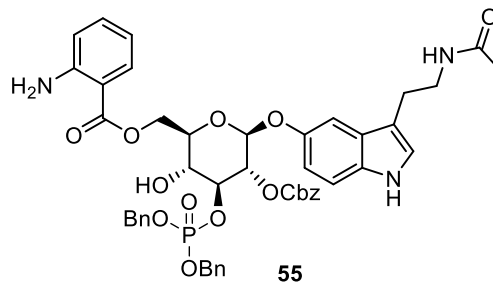

**<sup>1</sup>H NMR (600 MHz, acetone-*d*<sub>6</sub>):** δ (ppm) 7.89 (dd, *J* = 1.5, 8.1 Hz, 1H), 7.40-7.24 (m, 17H), 7.22 (d, *J* = 8.5 Hz, 1H), 7.15 (s, 1H), 6.84 (dd, *J* = 2.3, 8.7 Hz, 1H), 6.80 (dd, *J* = 0.6, 8.3 Hz, 1H), 6.56 (ddd, *J* = 1.1, 7.1, 8.3 Hz, 1H), 5.32 (d, *J* = 8.1 Hz, 1H), 5.24 (d, *J* = 12.2 Hz, 1H), 5.17-5.03 (m, 6H), 4.84 (m, 1H), 4.75 (dd, *J* = 1.2, 12.2 Hz, 1H), 4.53 (dd, *J* = 5.6, 11.8 Hz, 1H), 4.10 (m, 1H), 4.03 (t, *J* = 9.1 Hz, 1H), 3.50-3.39 (m, 2H), 2.83 (t, *J* = 7.2 Hz, 2H), 1.87 (s, 3H). **<sup>13</sup>C NMR (125 MHz, acetone-*d*<sub>6</sub>):** δ (ppm) 168.4, 155.4, 152.4, 152.0, 137.1, 136.5, 132.0, 129.34, 129.32, 129.26, 129.18, 129.13, 129.07, 129.04, 128.84, 128.81, 128.68, 124.44, 117.3, 116.1, 113.8, 113.5, 112.5, 110.4, 106.8, 101.1, 81.6 (d, *J* = 5.8

Hz), 77.1 (d,  $J = 4.6$  Hz), 74.6, 70.54, 70.46, 70.3 (d,  $J = 5.5$  Hz), 70.2 (d,  $J = 5.5$  Hz), 63.7, 40.4, 26.3, 23.0.

**HRMS (ESI)**  $m/z$  calcd for  $C_{47}H_{56}N_3O_{15}P$   $[M + H]^+$  894.2998, found 894.2957.

**((2*R*,3*R*,4*S*,5*R*,6*S*)-6-((3-(2-acetamidoethyl)-1*H*-indol-5-yl)oxy)-3,5-dihydroxy-4-(phosphonooxy)tetrahydro-2*H*-pyran-2-yl)methyl 2-aminobenzoate (sngl#4, **32**).** To a solution of **55**

(54.9 mg, 61.4  $\mu$ mol, 1.0 eq.) in a mixture of MeOH and EtOAc (2.5 mL, v/v = 2:3) was added Pd/C (10% w/w) (32 mg). The reaction mixture was purged with argon for 5 minutes, flushed with hydrogen, and then subjected to hydrogen atmosphere for 3 hours at room temperature, and again purged with argon for 5 minutes. The mixture was filtered through celite and concentrated *in vacuo*, affording sngl#4 (**32**, 33.4 mg, 94%).

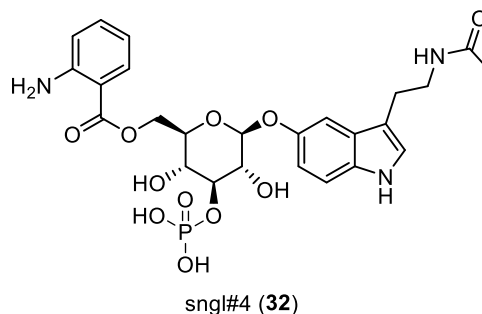

See Supplementary Table 9 for NMR spectroscopic data of sngl#4 (**32**).

**HRMS (ESI)**  $m/z$  calcd for  $C_{33}H_{36}N_3O_{13}P$ ,  $[M - H]^-$  578.1545, found 578.1554.

## 2.6. Synthesis of dansyl-modified serotonin **41** and **42**

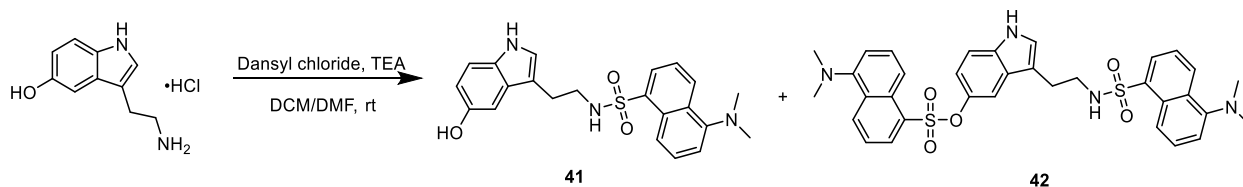

### 5-(Dimethylamino)-*N*-(2-(5-hydroxy-1*H*-indol-3-yl)ethyl)naphthalene-1-sulfonamide (**41**).

To a suspension of serotonin hydrochloride (60.0 mg, 0.282 mmol, 1.2 eq.) and dansyl chloride (63.4 mg, 0.235 mmol, 1.0 eq.) in a mixture of DCM and DMF (3.5 mL, v/v = 6:1) was added TEA (49  $\mu$ L, 0.352 mmol, 1.5 eq.). The solution was stirred at room temperature for 1 hour and quenched with water. The mixture was extracted with DCM twice, washed with sat. aq.  $NaHCO_3$  and brine, dried with  $Na_2SO_4$ , and concentrated *in vacuo*. Flash column chromatography on silica using a gradient of 0-10% methanol in DCM afforded **41** (40.2 mg, 42%) as a yellow-green oil.

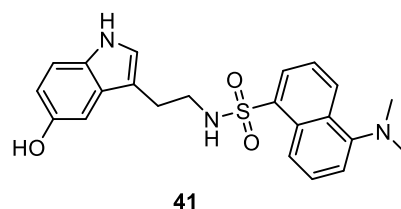

**$^1H$  NMR (600 MHz, chloroform-*d*):**  $\delta$  (ppm) 8.51 (dt,  $J = 0.8, 8.6$  Hz, 1H), 8.20 (dd,  $J = 1.2, 7.3$  Hz, 1H), 8.16 (dt,  $J = 0.8, 8.6$  Hz, 1H), 8.06 (br, 1H), 7.47 (dd,  $J = 7.3, 8.4$  Hz, 1H), 7.43 (dd,  $J = 7.6, 8.4$  Hz, 1H), 7.14 (dd,  $J = 0.6, 7.6$  Hz, 1H), 7.12 (dd,  $J = 0.6, 8.6$  Hz, 1H), 6.75 (ddd,  $J = 0.4,$

2.4, 8.6 Hz, 1H), 6.72 (m, 2H), 6.24 (s, 1H), 4.93 (t,  $J = 6.0$  Hz, 1H), 3.16 (dt,  $J = 6.2, 6.8$  Hz, 1H), 2.89 (s, 6H), 2.71 (t,  $J = 6.8$  Hz, 1H).  **$^{13}\text{C}$  NMR (125 MHz, chloroform- $d$ ):**  $\delta$  (ppm) 151.9, 150.0, 134.8, 131.5, 130.4, 129.9, 129.60, 129.58, 128.3, 127.6, 123.6, 123.3, 118.8, 115.3, 112.3, 111.9, 110.8, 102.9, 45.5, 43.3, 25.6.

**HRMS (ESI)**  $m/z$  calcd for  $\text{C}_{22}\text{H}_{23}\text{N}_3\text{O}_3\text{S}$ ,  $[\text{M} + \text{H}]^+$  410.1533, found 410.1521.

**3-(2-((5-(Dimethylamino)naphthalene)-1-sulfonamido)ethyl)-1H-indol-5-yl (dimethylamino)naphthalene-1-sulfonate (42).**

**42** was obtained as a side product in the synthesis of **41** described above. Flash column chromatography on silica using a gradient of 0-5% methanol in DCM afforded **42** (4.4 mg, 3%) as a yellow-green oil.

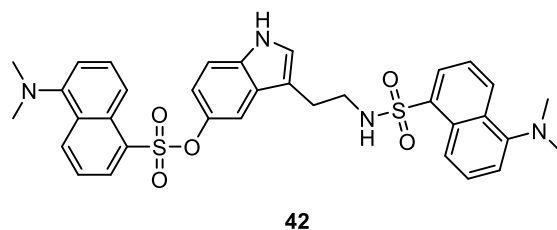

**$^1\text{H}$  NMR (600 MHz, chloroform- $d$ ):**  $\delta$  (ppm) 8.53 (d,  $J = 8.7$  Hz, 2H), 8.50 (d,  $J = 8.7$  Hz, 1H), 8.18 (dd,  $J = 1.2, 7.2$  Hz, 1H), 8.11 (d,  $J = 8.7$  Hz, 1H), 7.97 (dd,  $J = 1.2, 7.2$  Hz, 1H), 7.89 (br, 1H), 7.68 (dd,  $J = 7.6, 8.5$  Hz, 1H), 7.49 (dd,  $J = 7.4, 8.5$  Hz, 1H), 7.44 (dd,  $J = 7.6, 8.5$  Hz, 1H), 7.29 (t,  $J = 7.8$  Hz, 1H), 7.25 (1H), 7.15 (d,  $J = 7.6$  Hz, 1H), 7.03 (t,  $J = 8.8$  Hz, 1H), 6.76 (s, 1H), 6.74 (d,  $J = 1.6$  Hz, 1H), 6.65 (dd,  $J = 2.3, 8.8$  Hz, 1H), 4.54 (t,  $J = 5.9$  Hz, 1H), 2.97 (dt,  $J = 6.4, 6.7$  Hz, 1H), 2.90 (s, 12H), 2.59 (t,  $J = 6.4$  Hz, 1H).  **$^{13}\text{C}$  NMR (125 MHz, chloroform- $d$ ):**  $\delta$  (ppm) 151.9, 143.4, 134.73, 134.67, 131.7, 131.4, 131.3, 130.6, 130.4, 129.8, 129.6, 129.1, 128.4, 126.9, 124.3, 123.3, 123.1, 120.0, 116.9, 115.7, 115.3, 112.2, 111.7, 45.62, 45.59, 42.9, 25.5.

**HRMS (ESI)**  $m/z$  calcd for  $\text{C}_{34}\text{H}_{34}\text{N}_4\text{O}_5\text{S}_2$ ,  $[\text{M} + \text{H}]^+$  643.2043, found 643.2024.

#### 4. NMR Spectra

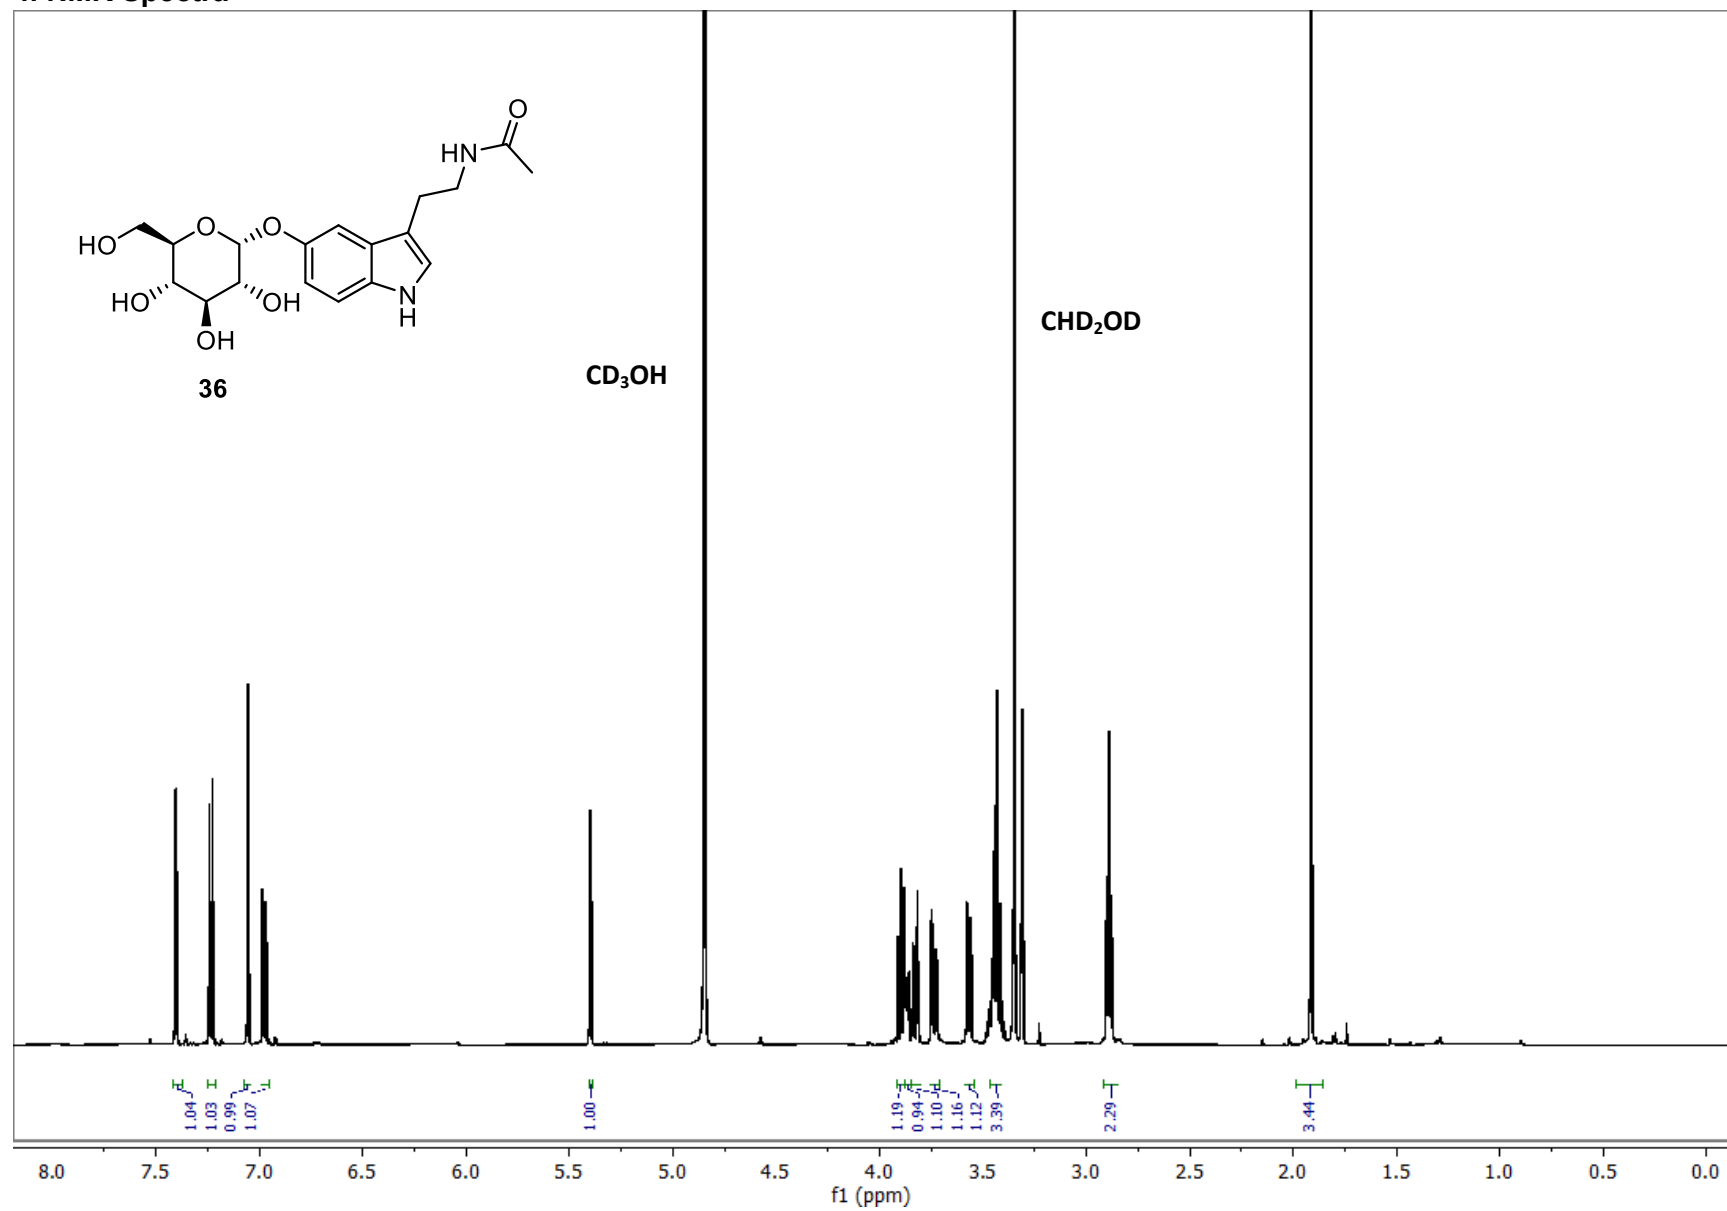

$^1\text{H}$  NMR spectrum (600 MHz) of **36** in methanol- $d_4$ .

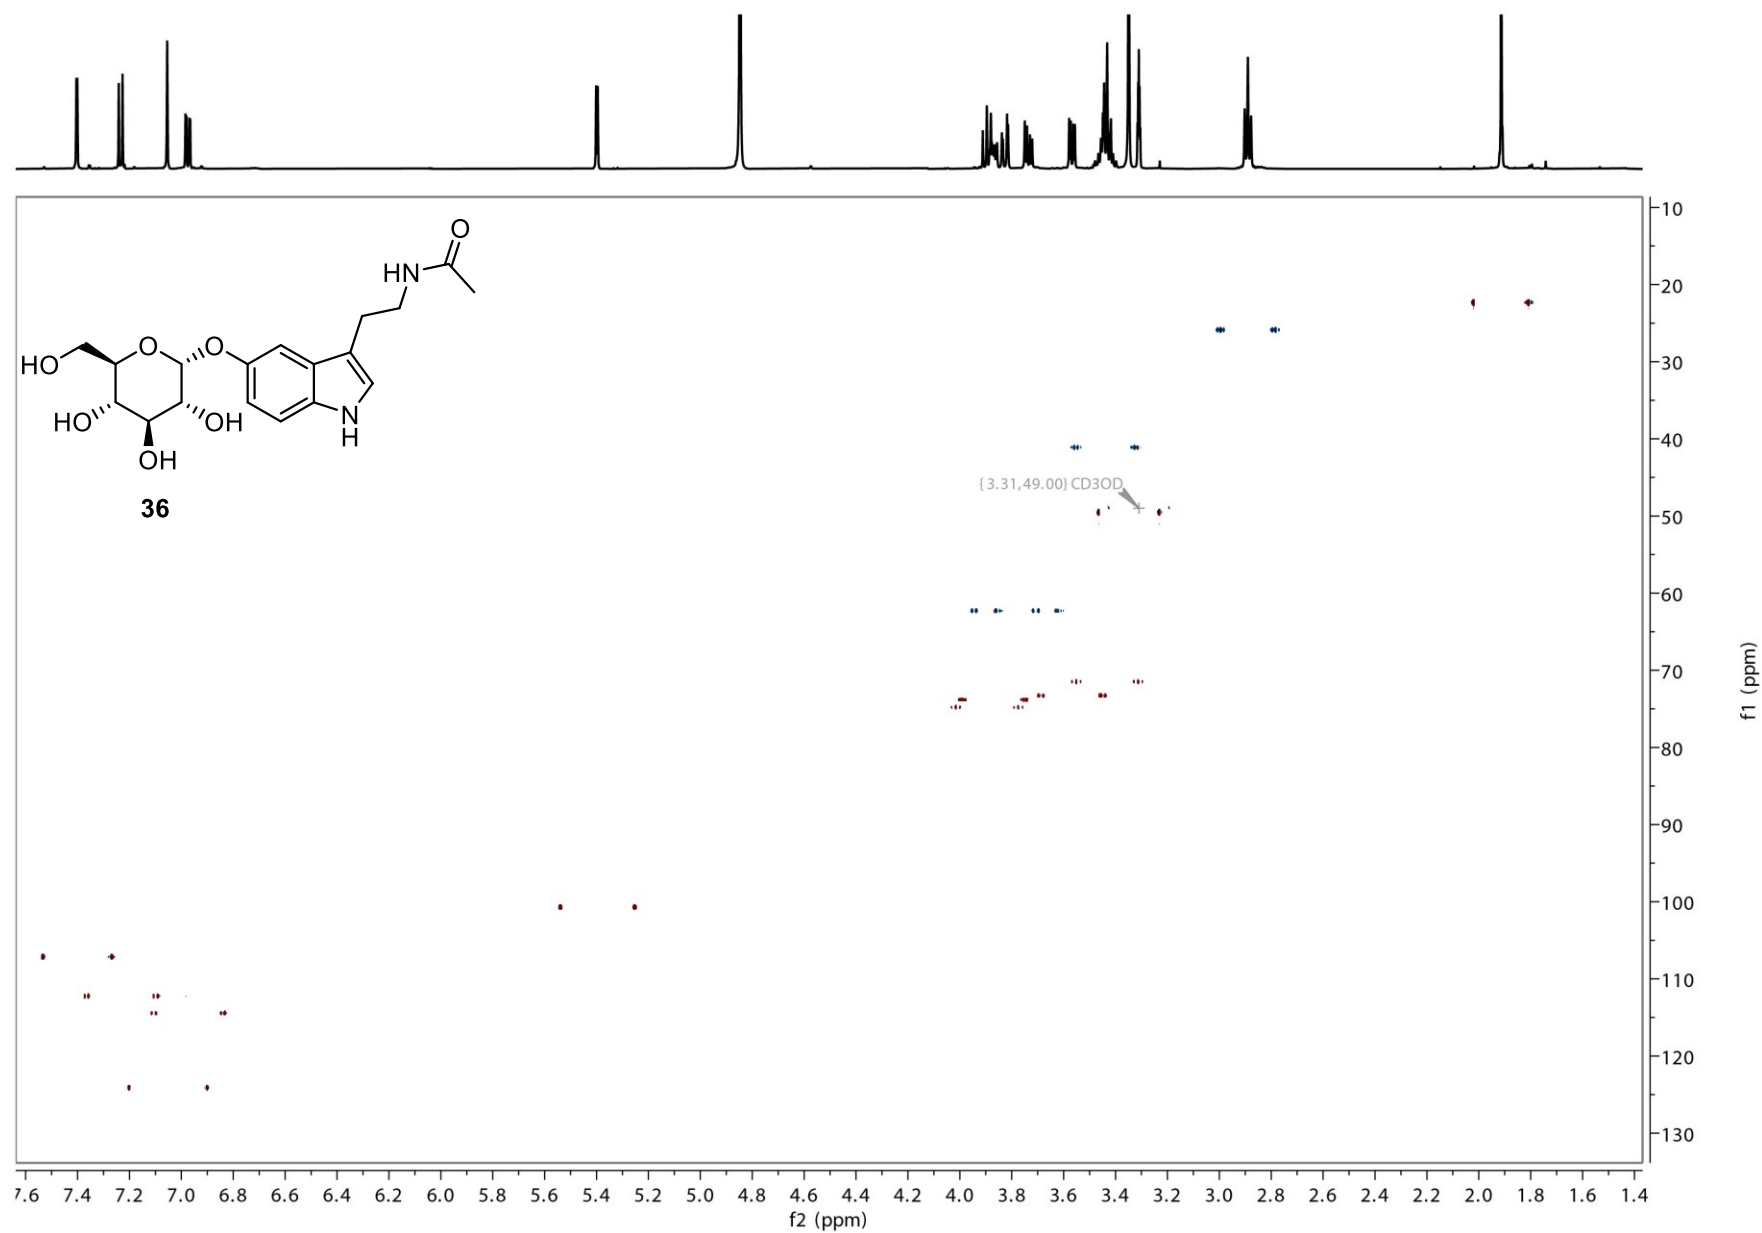

HSQC spectrum (600 MHz) of **36** in methanol- $d_4$ .

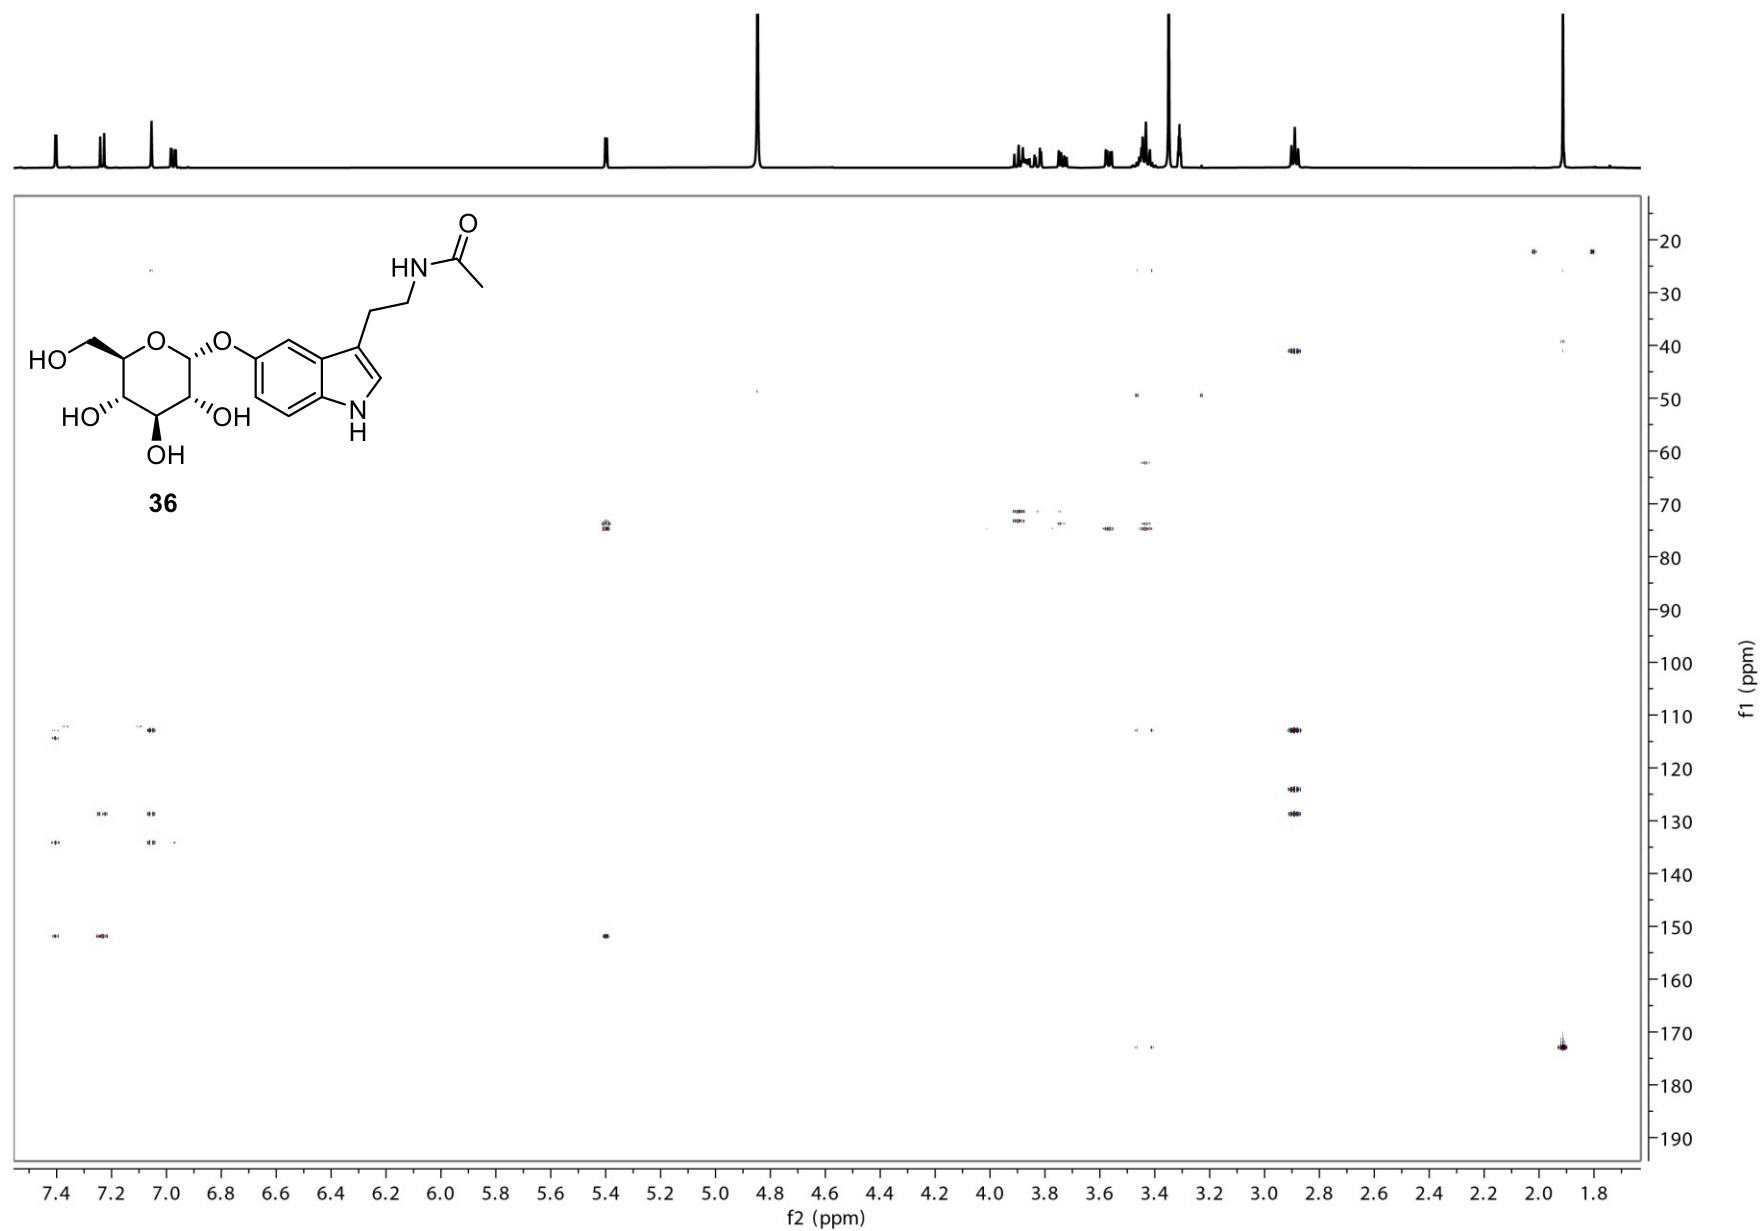

HMBC spectrum (600 MHz) of **36** in methanol- $d_4$ .

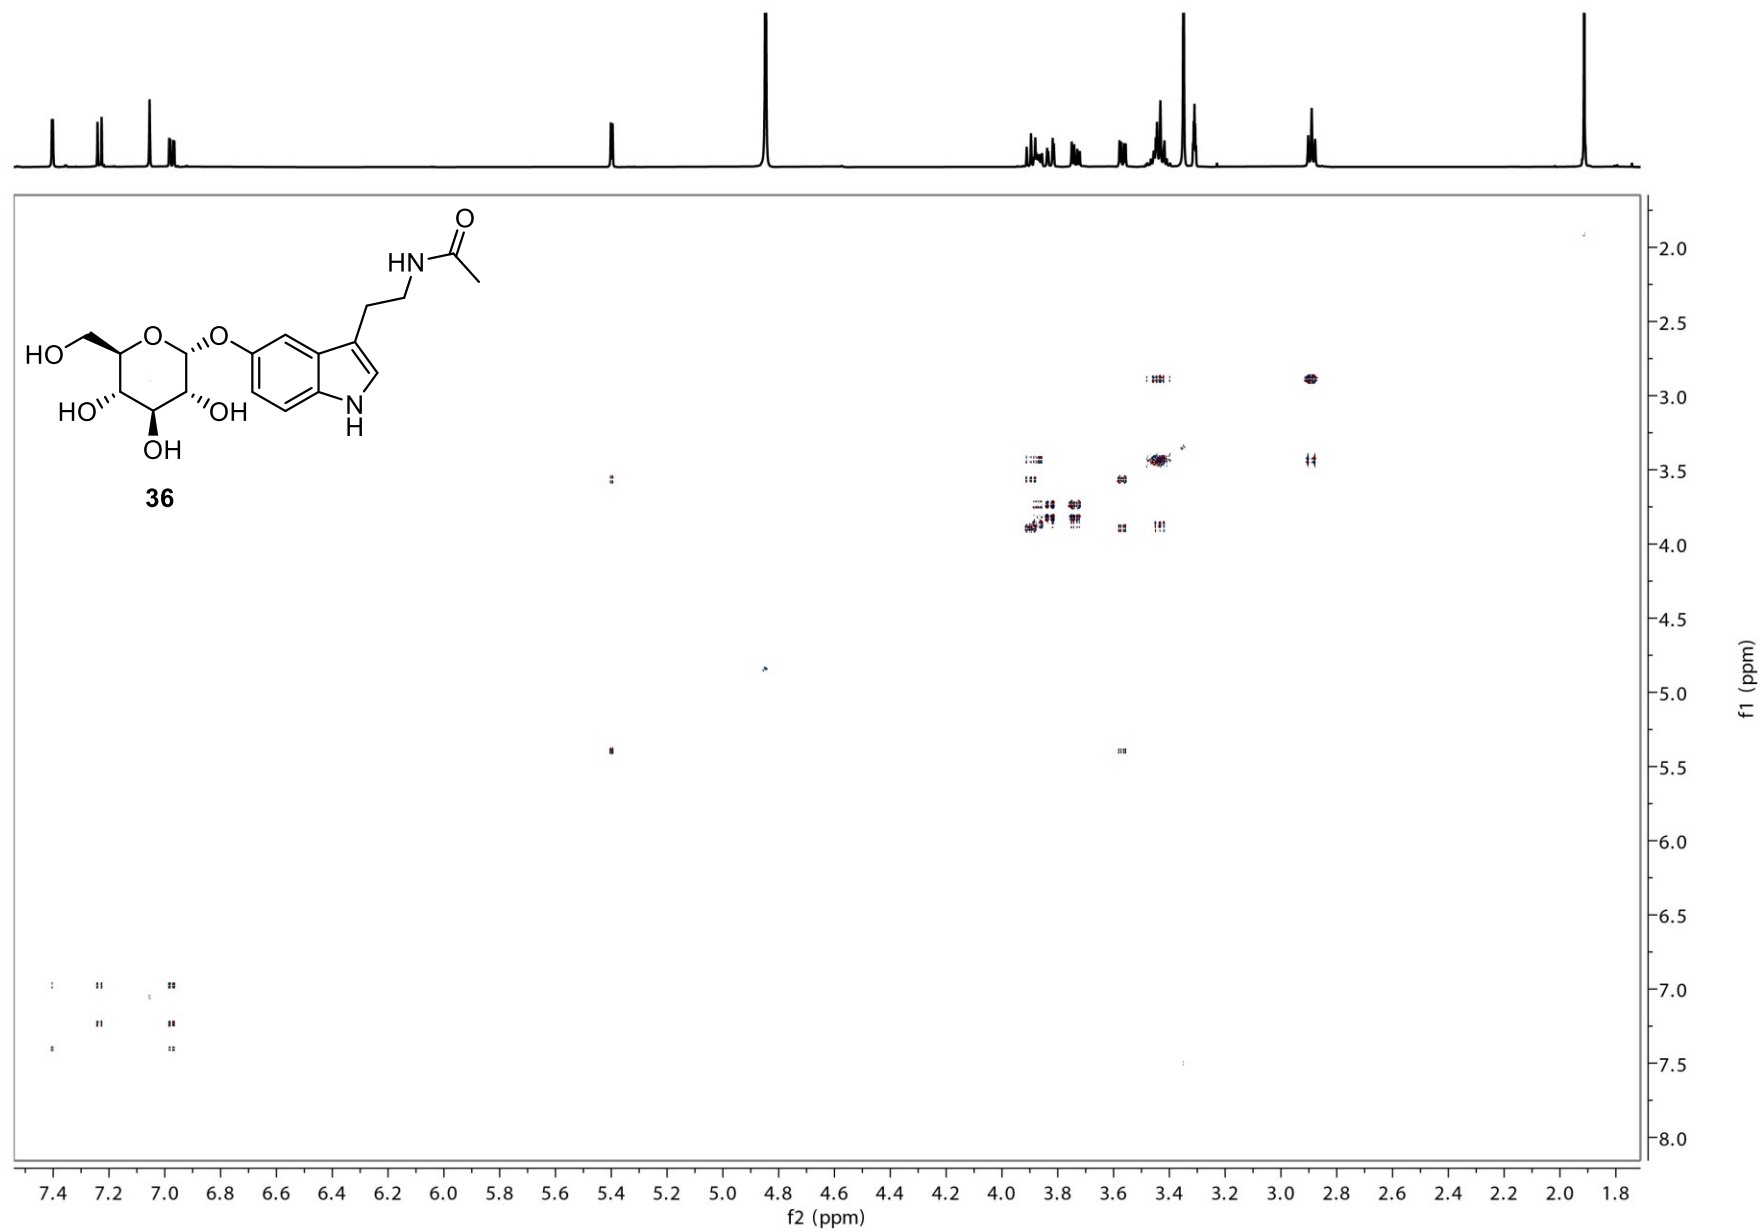

dqfCOSY spectrum (600 MHz) of **36** in methanol- $d_4$ .

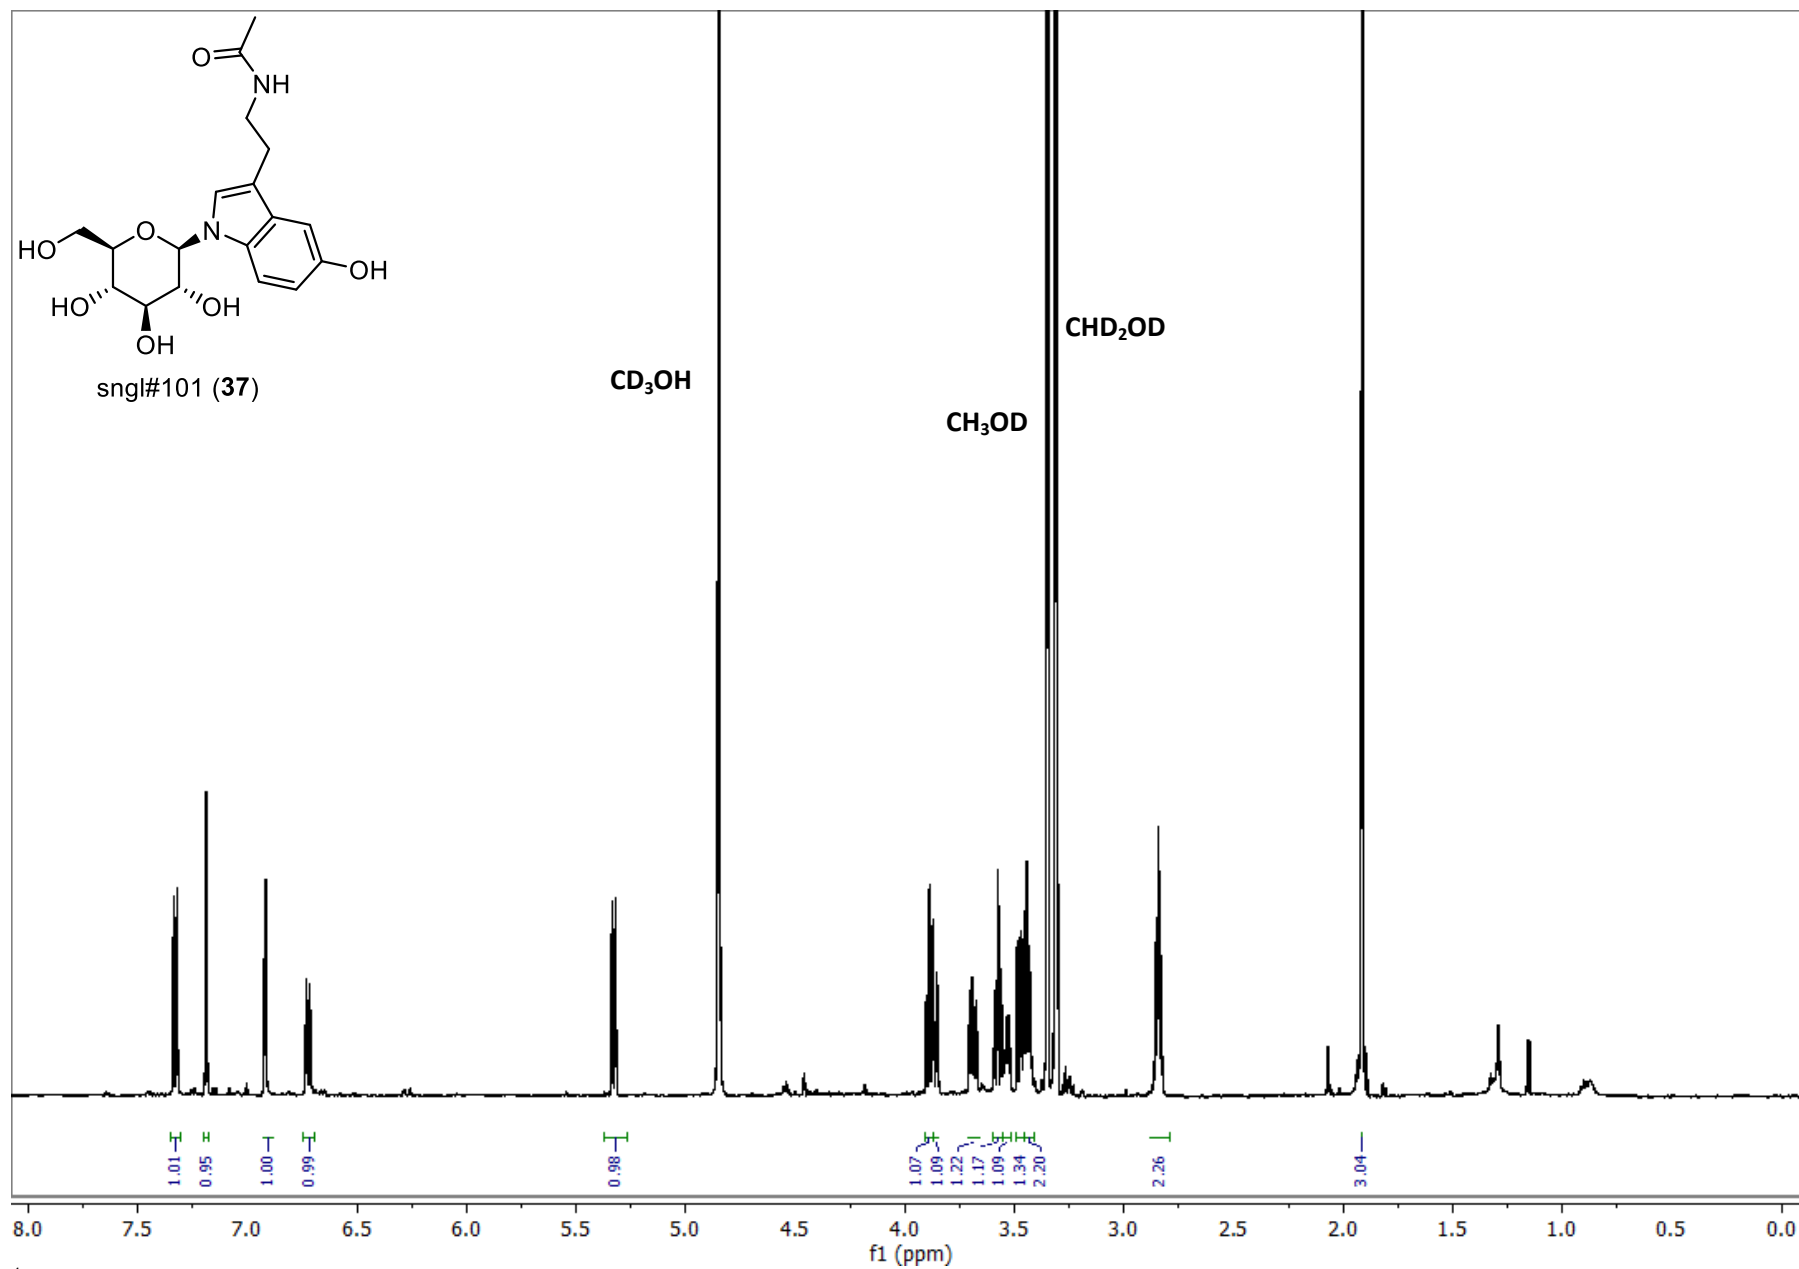

$^1\text{H}$  NMR spectrum (600 MHz) of sngl#101 (**37**) in methanol- $d_4$ .

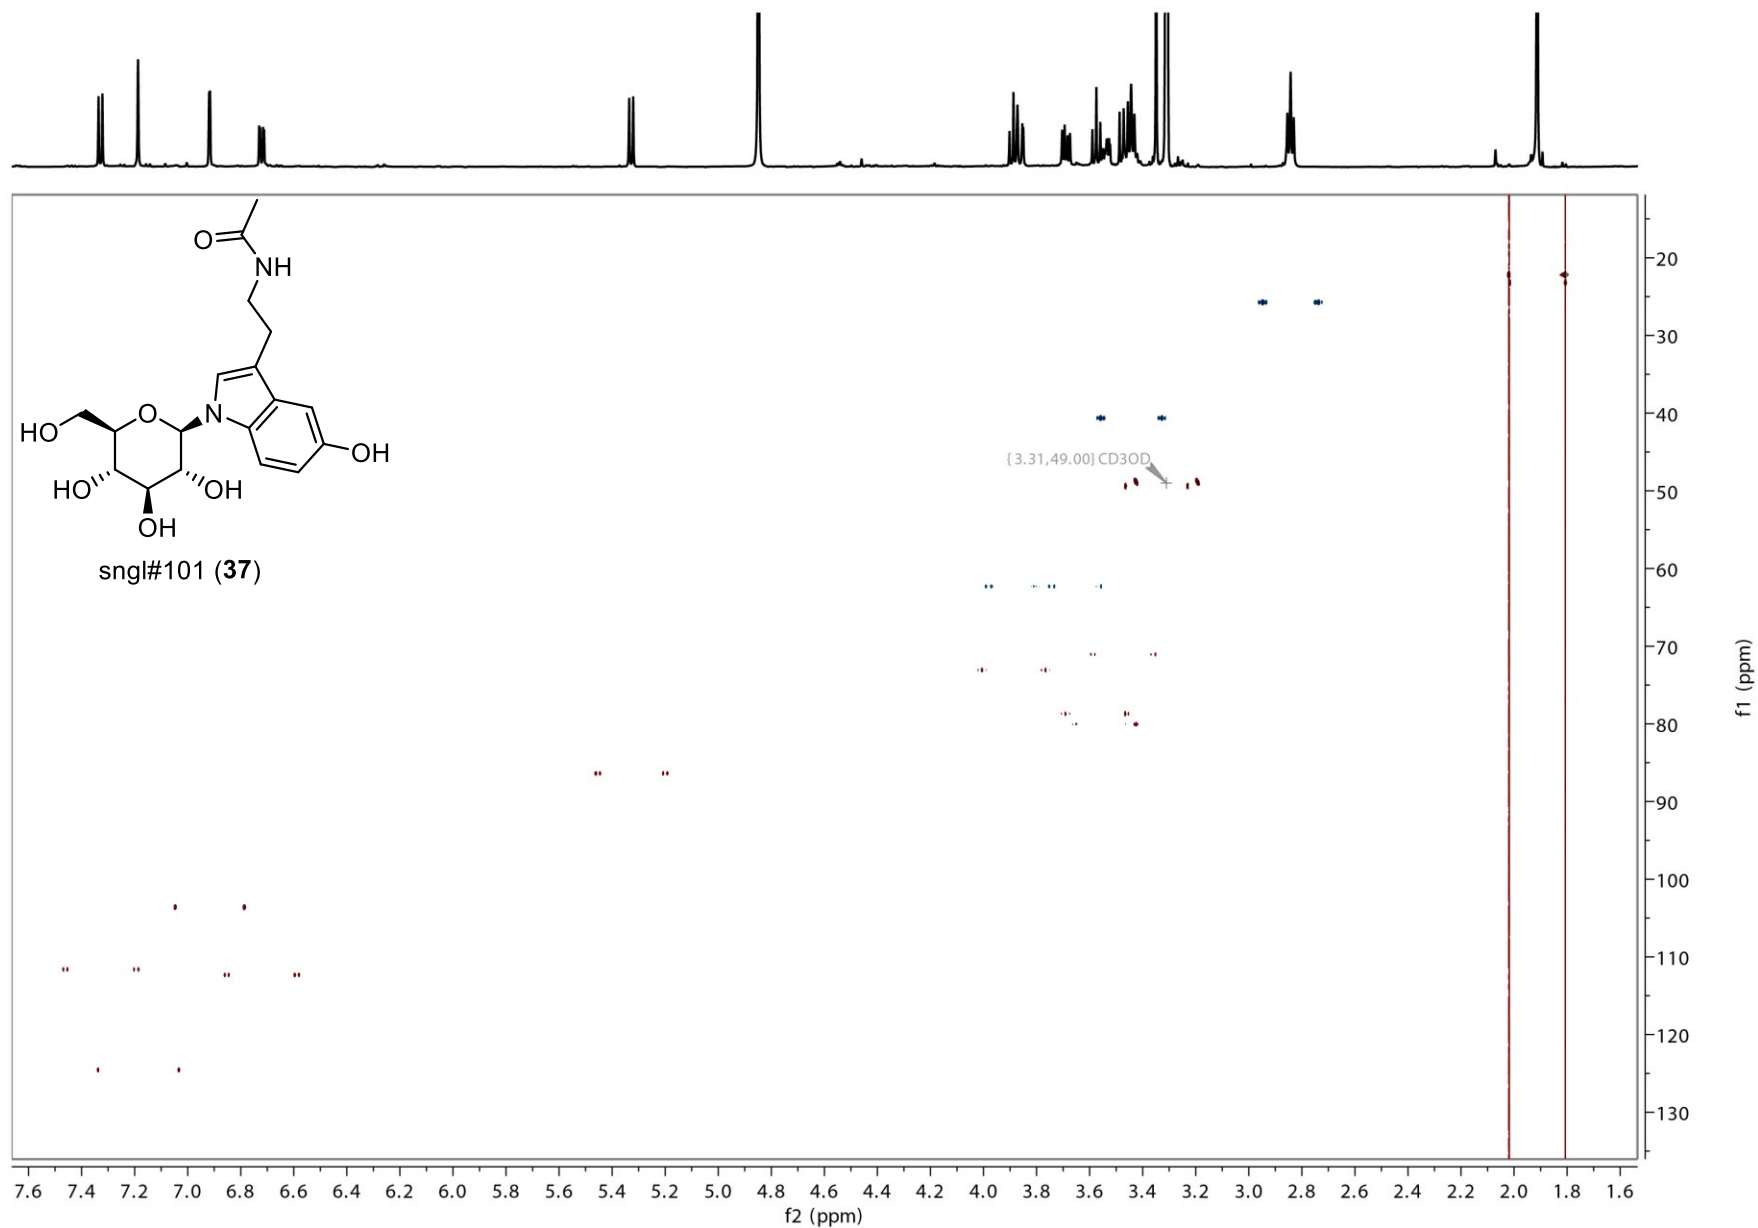

HSQC spectrum (600 MHz) of **sngl#101 (37)** in methanol- $d_4$ .

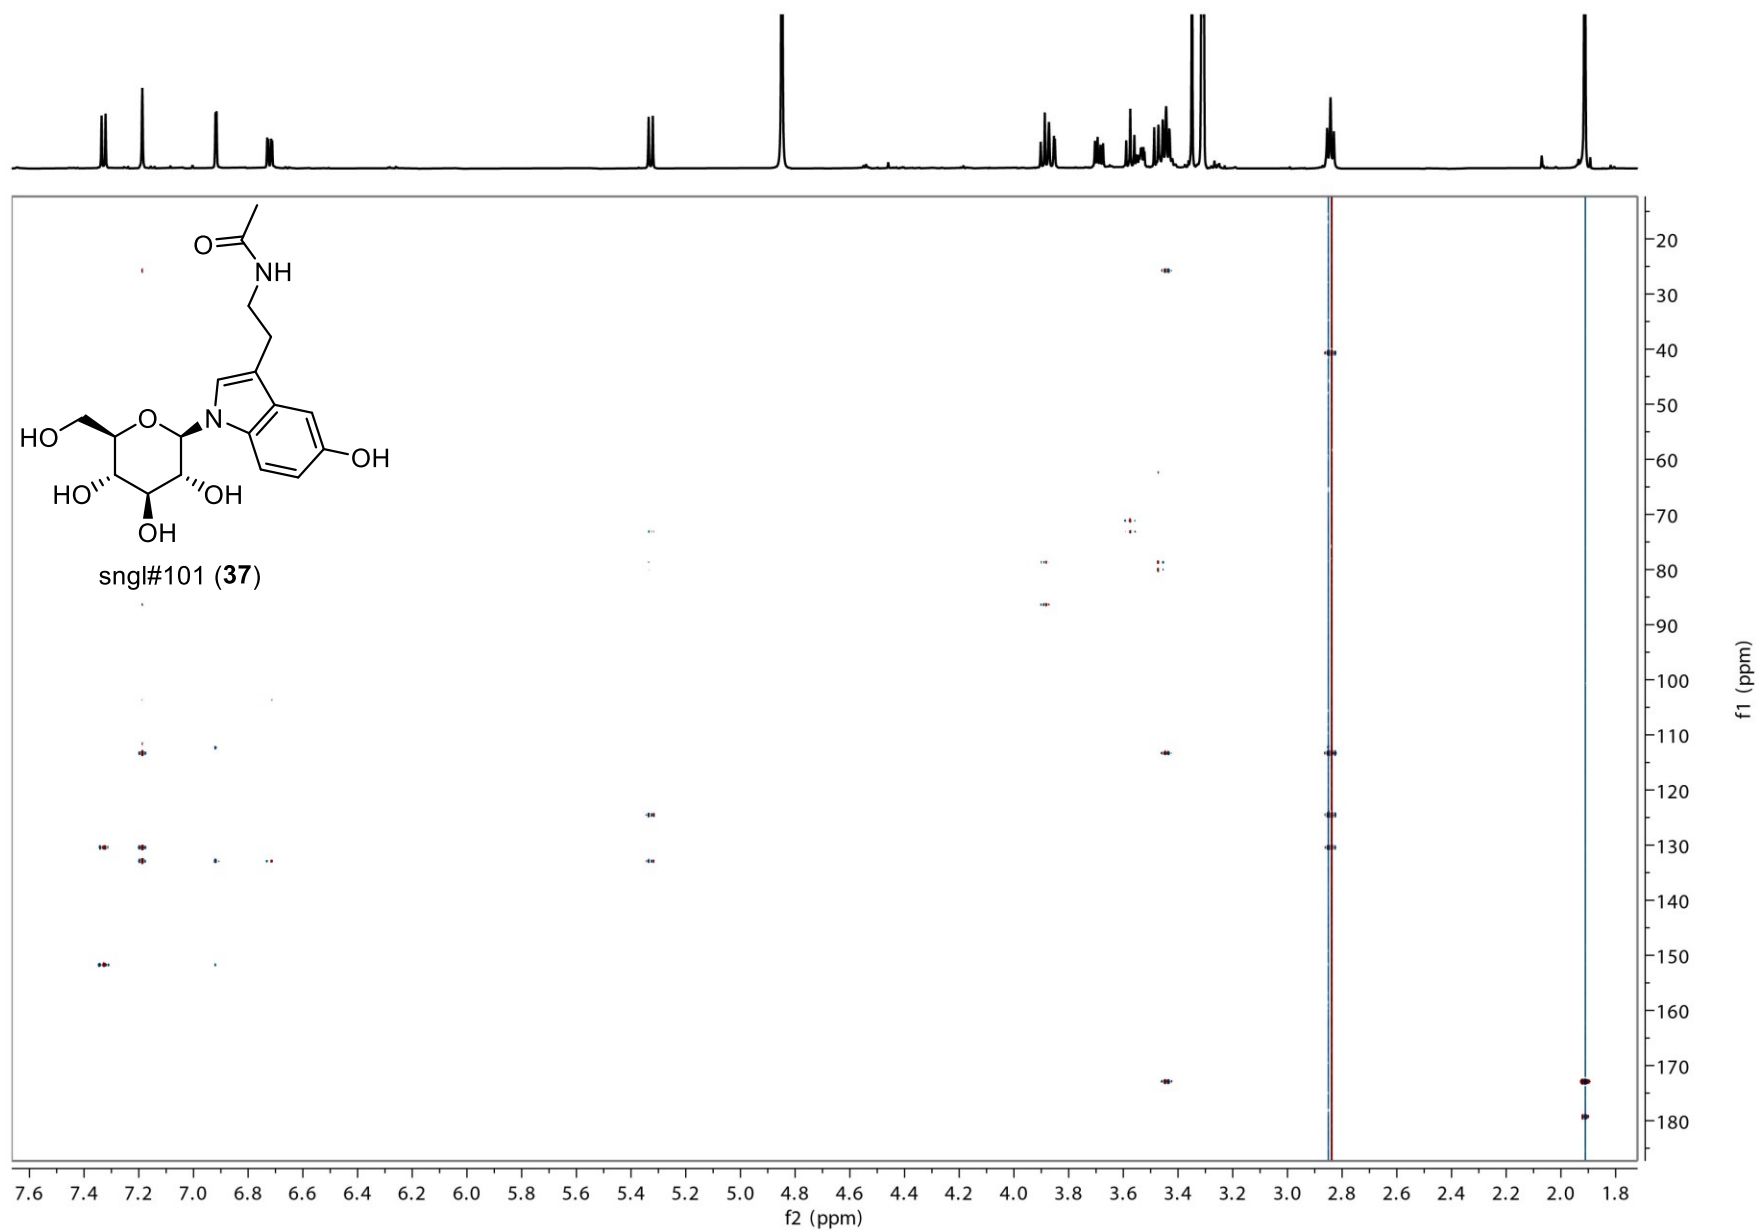

HMBC spectrum (600 MHz) of sngl#101 (**37**) in methanol- $d_4$ .

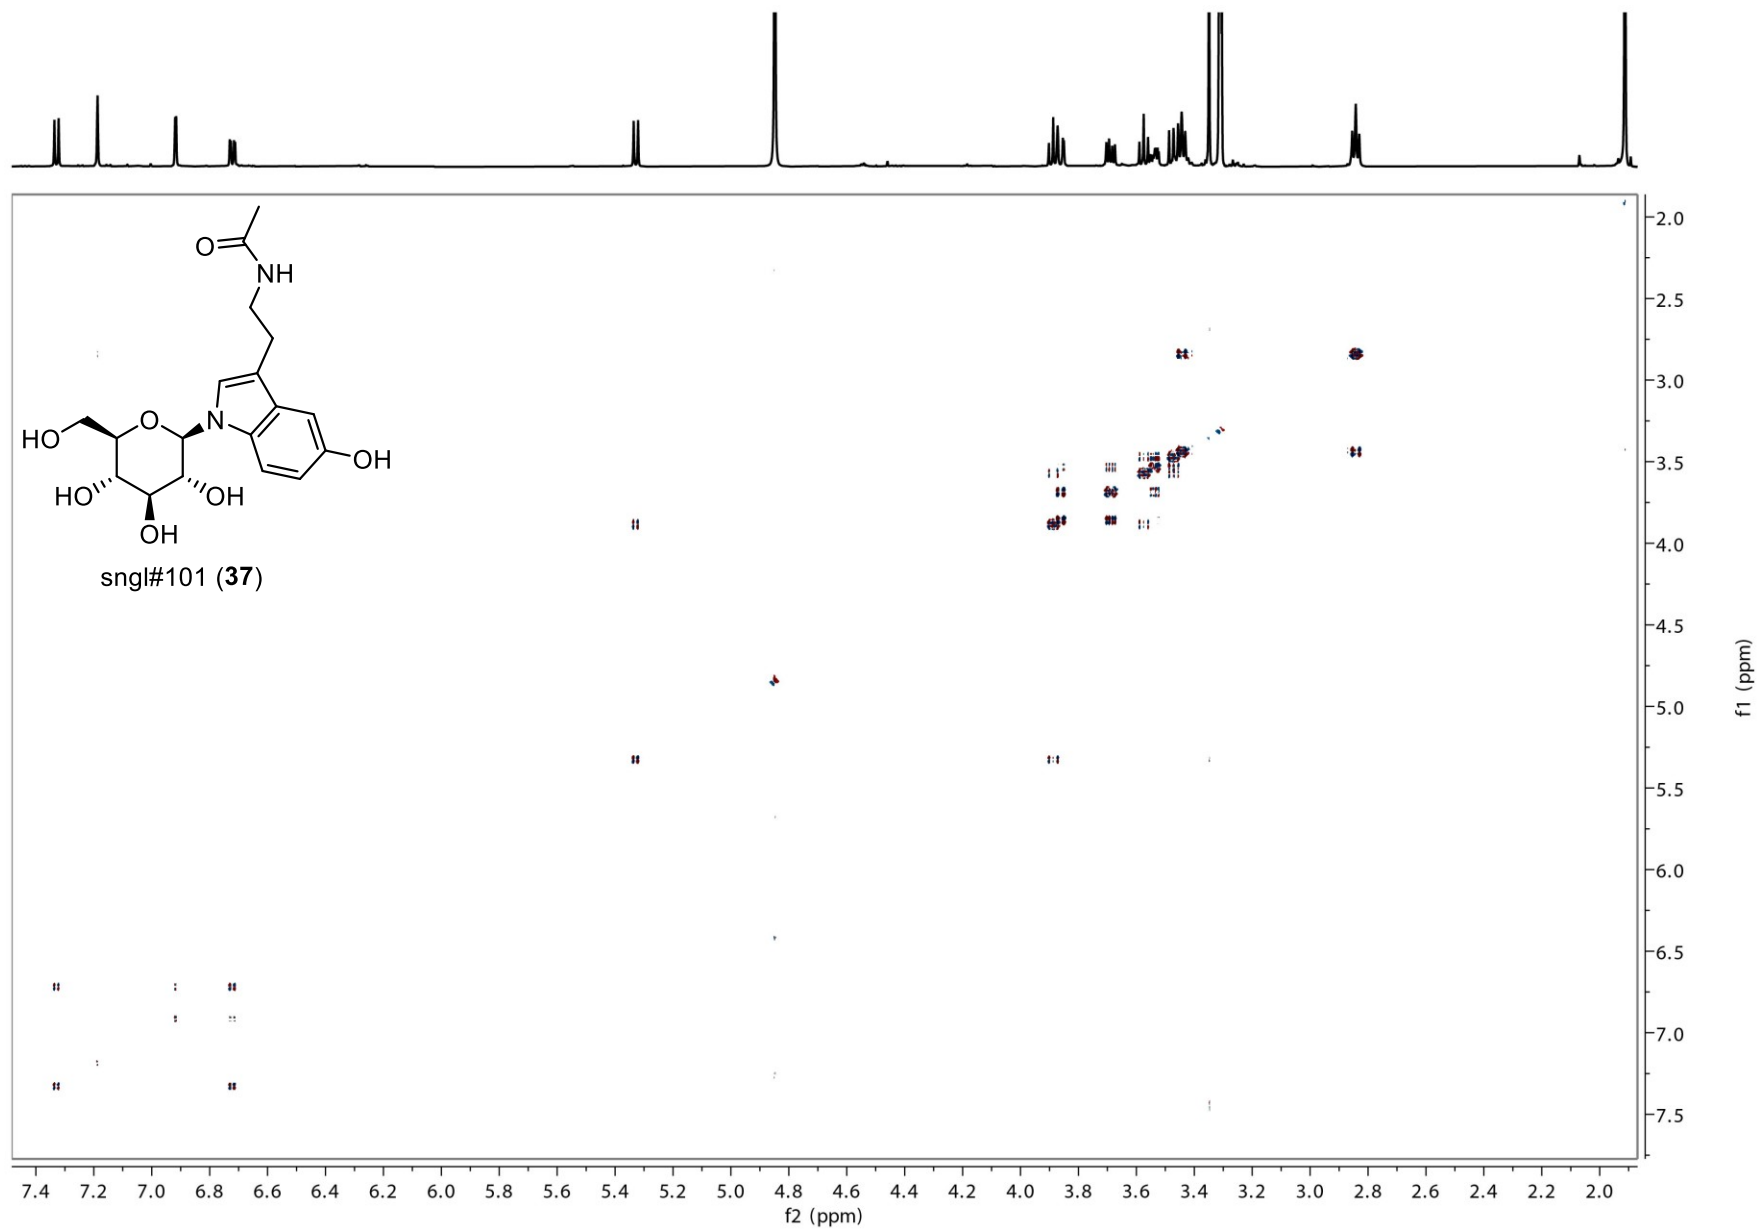

dqfCOSY spectrum (600 MHz) of sngl#101 (**37**) in methanol- $d_4$ .



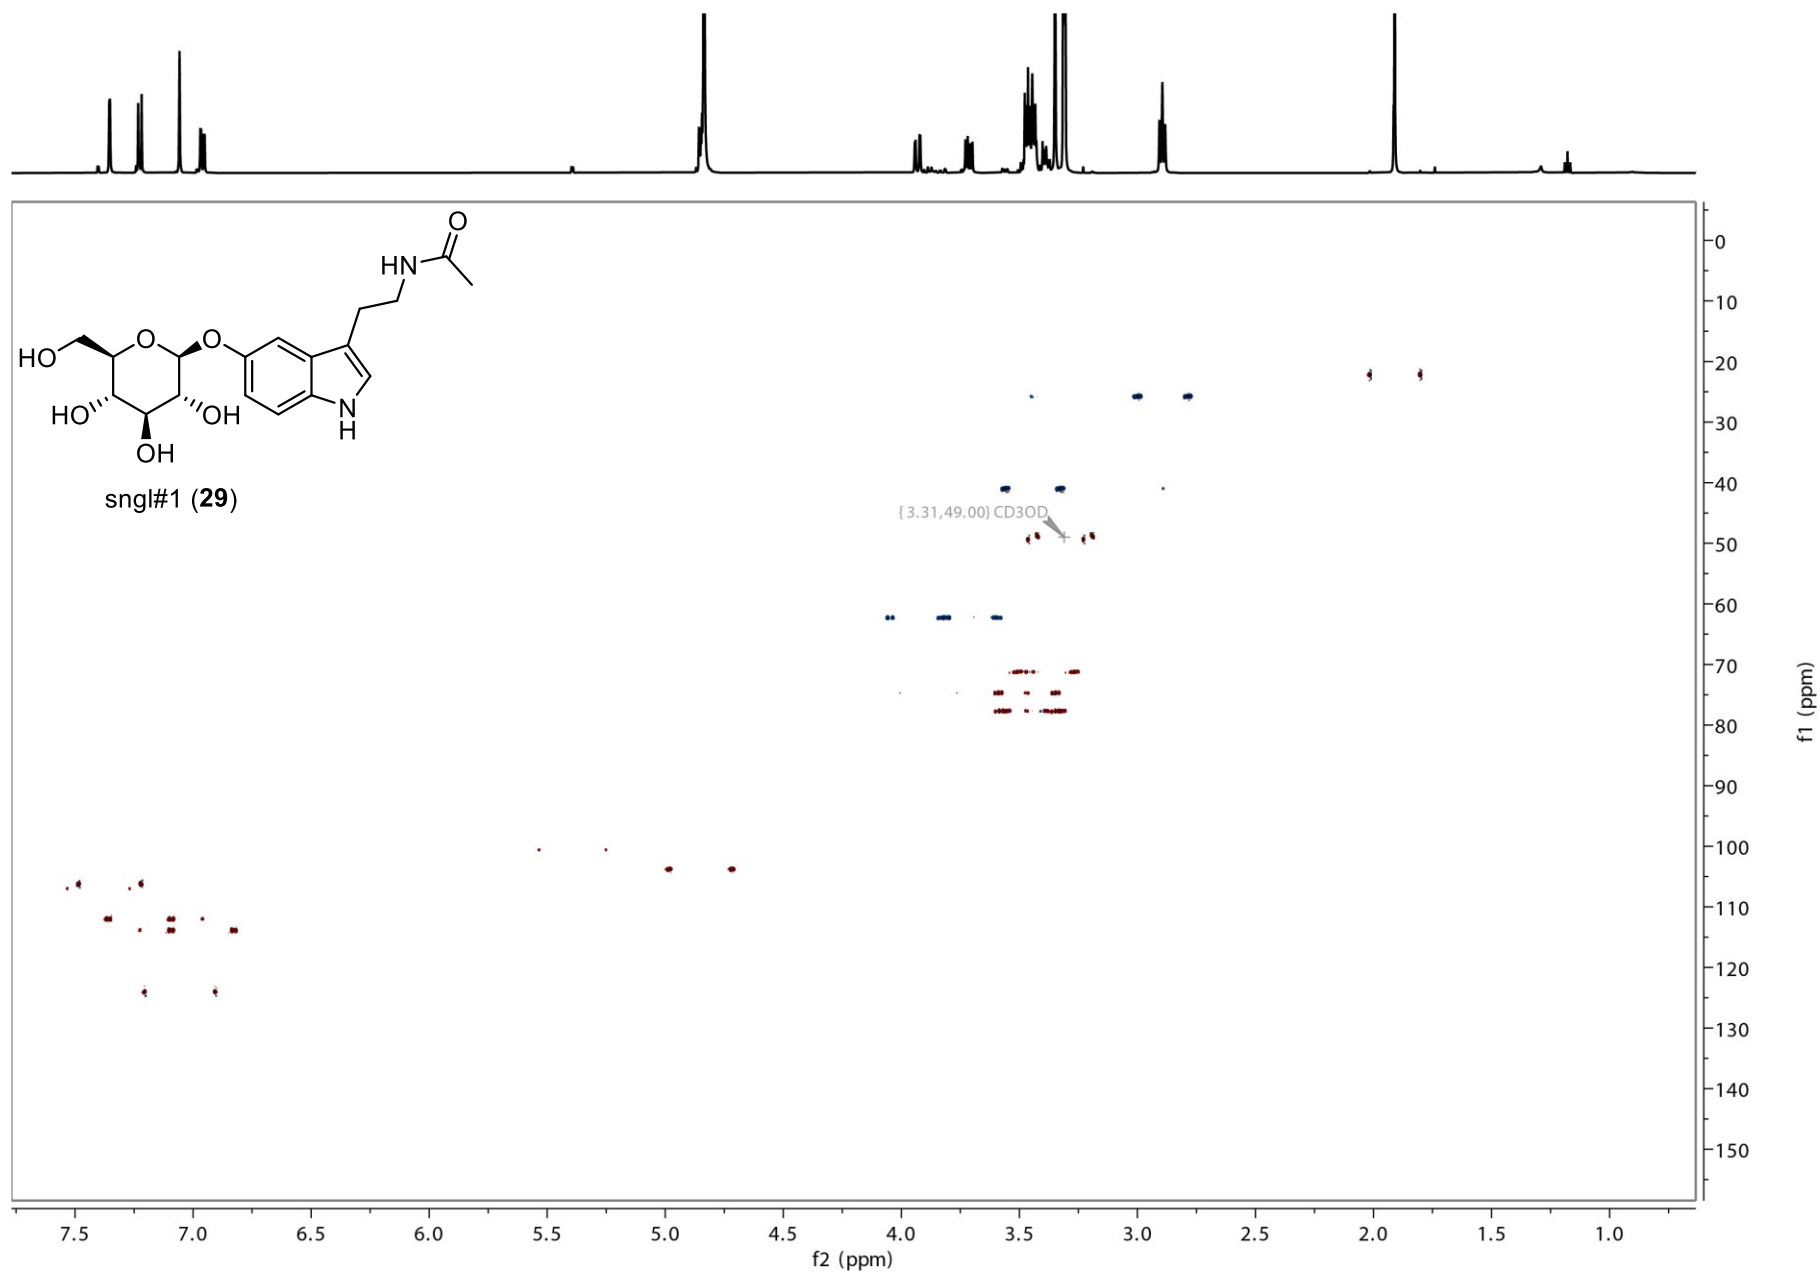

HSQC spectrum (600 MHz) of sngl#1 (**29**) in methanol- $d_4$ .

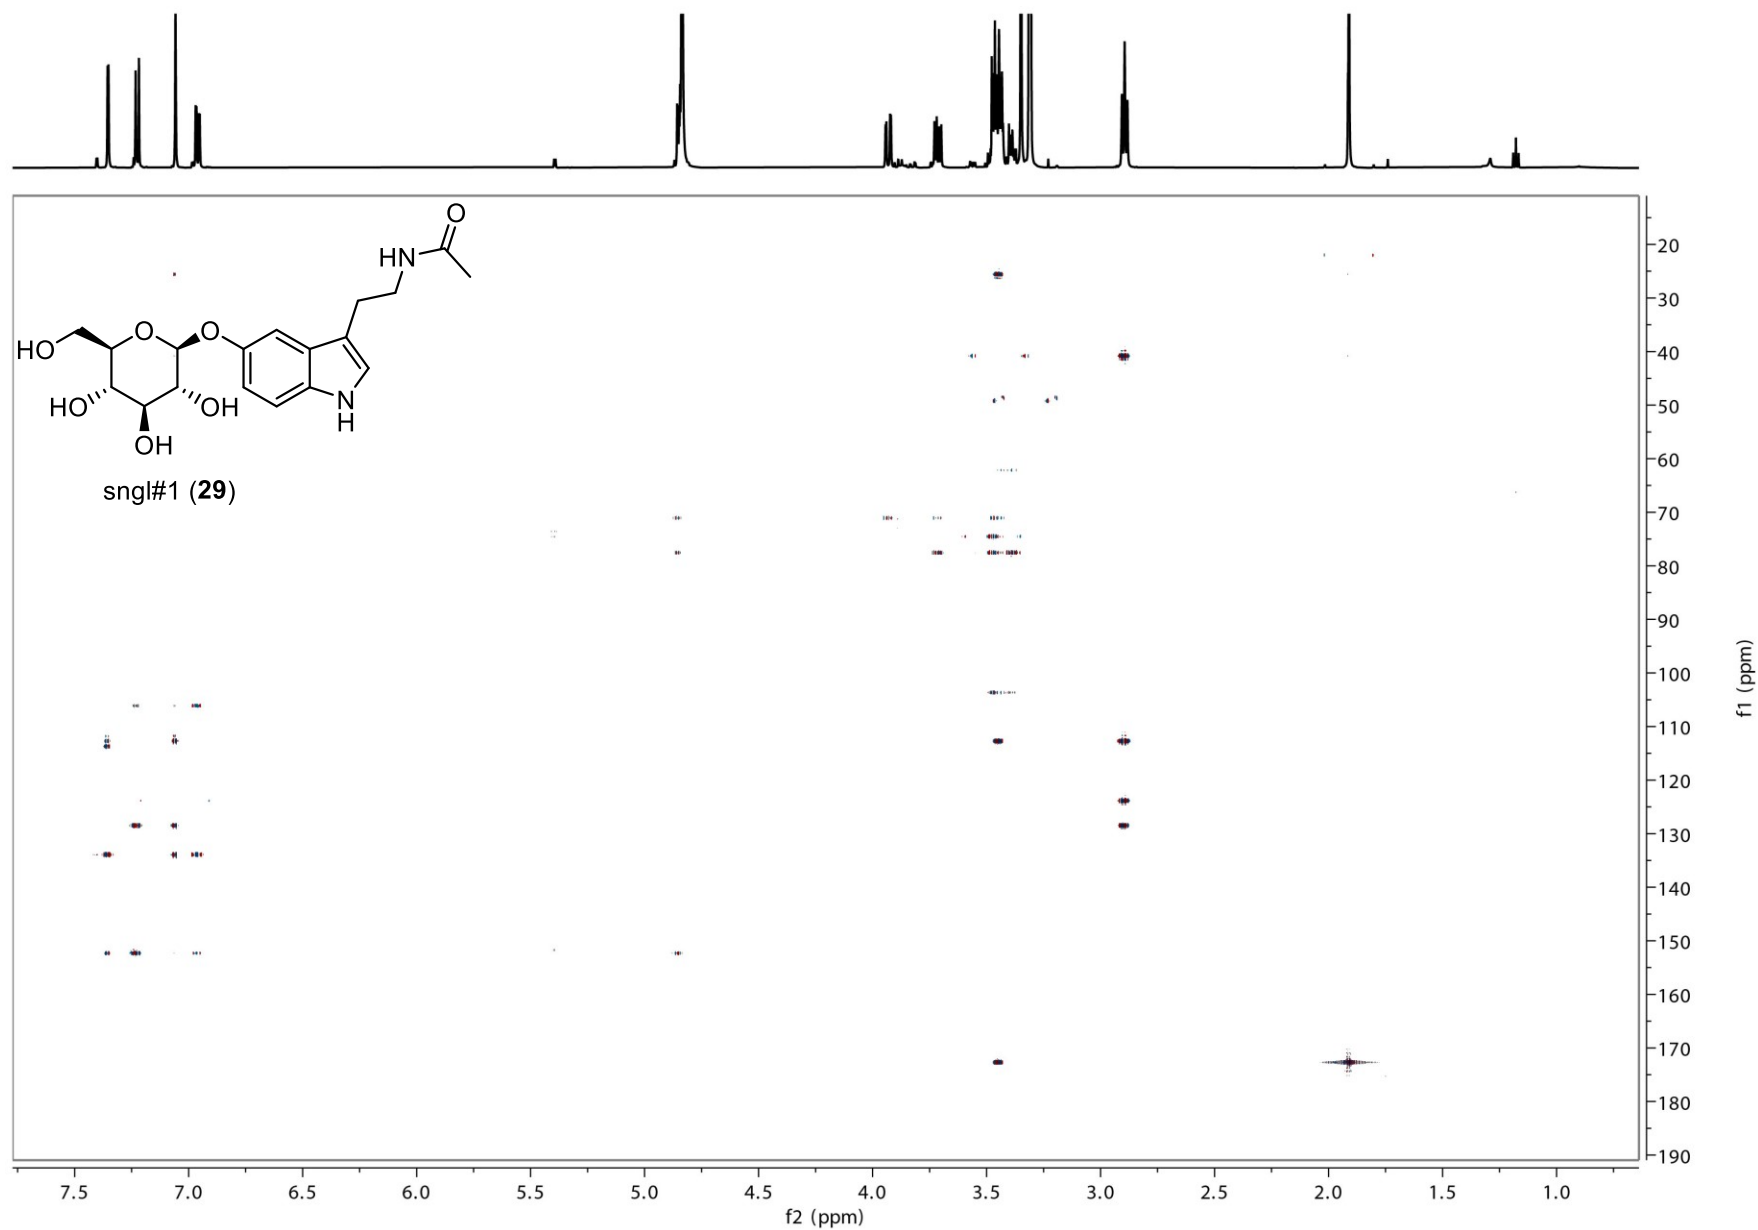

HMBC spectrum (600 MHz) of sngl#1 (**29**) in methanol- $d_4$ .

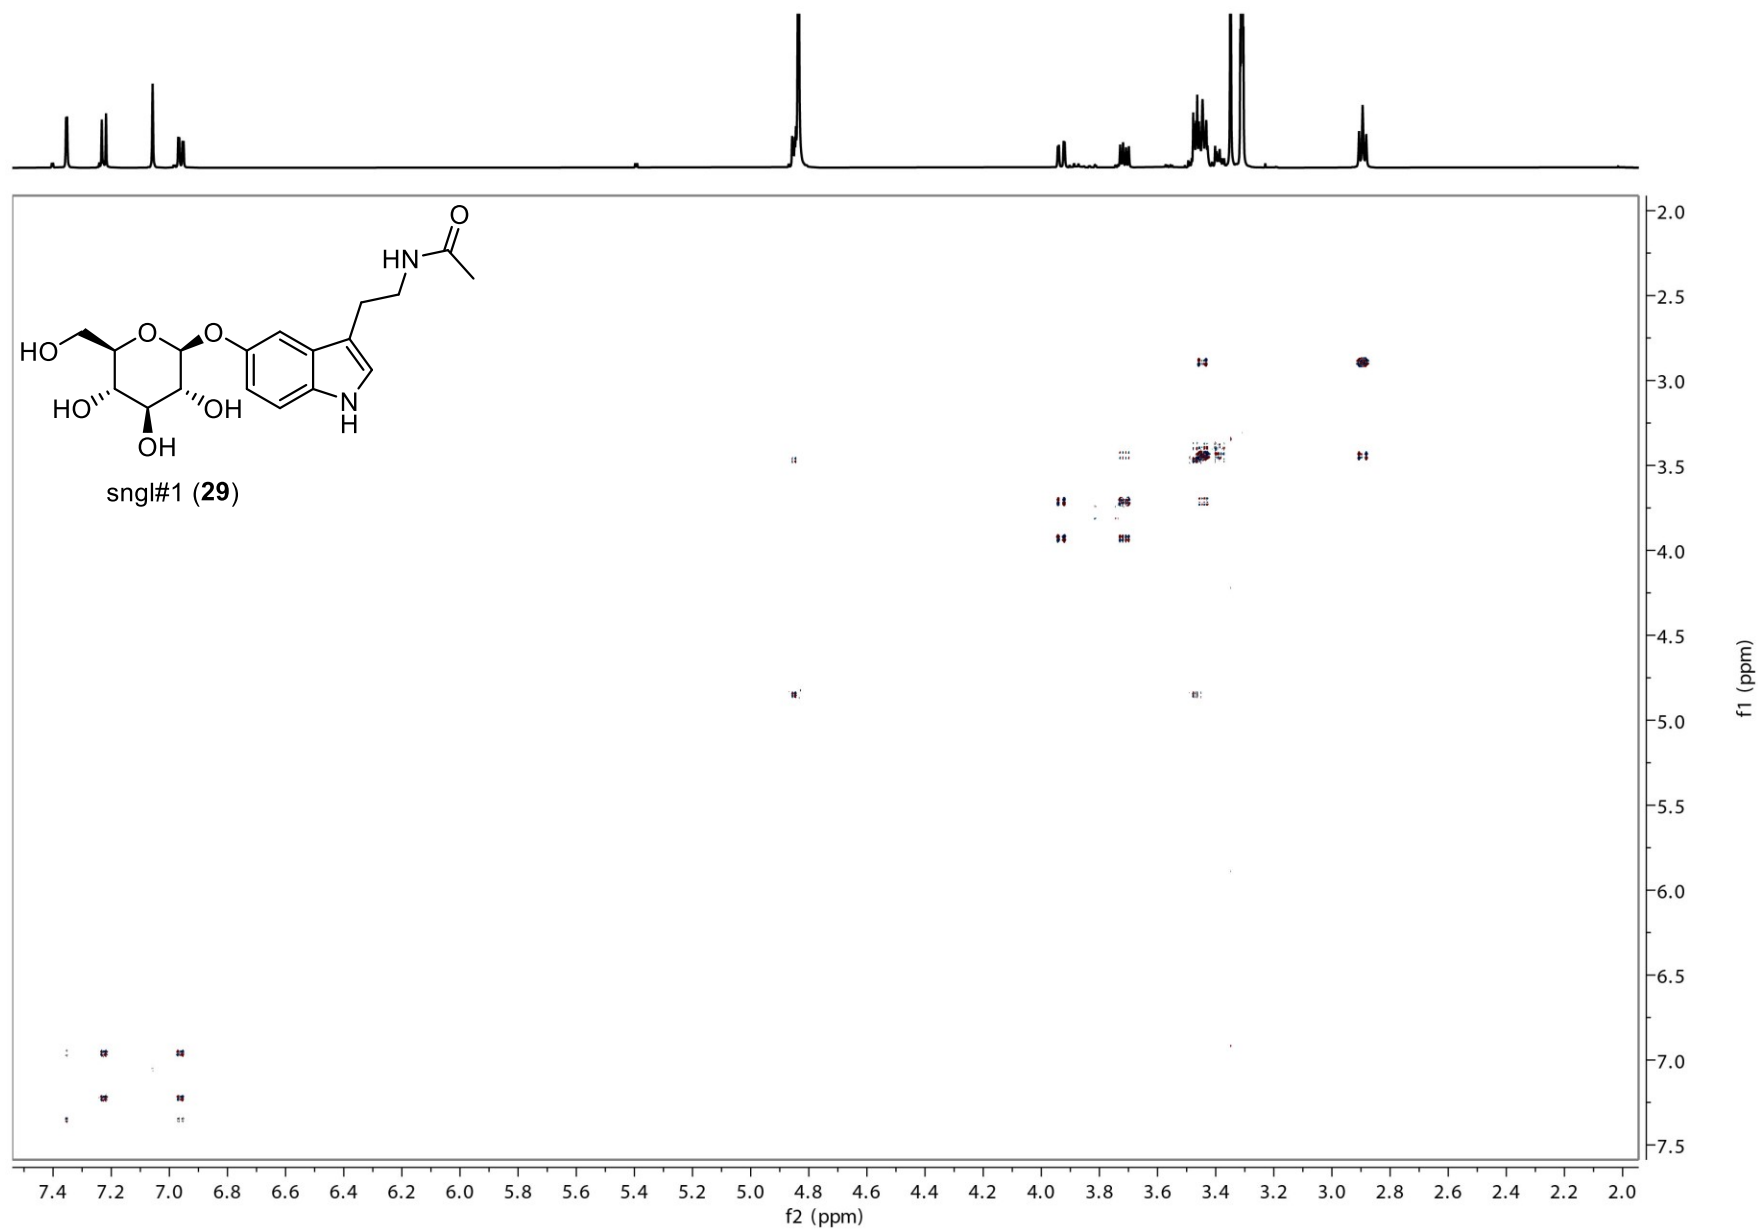

dqfCOSY spectrum (600 MHz) of sngl#1 (**29**) in methanol- $d_4$ .

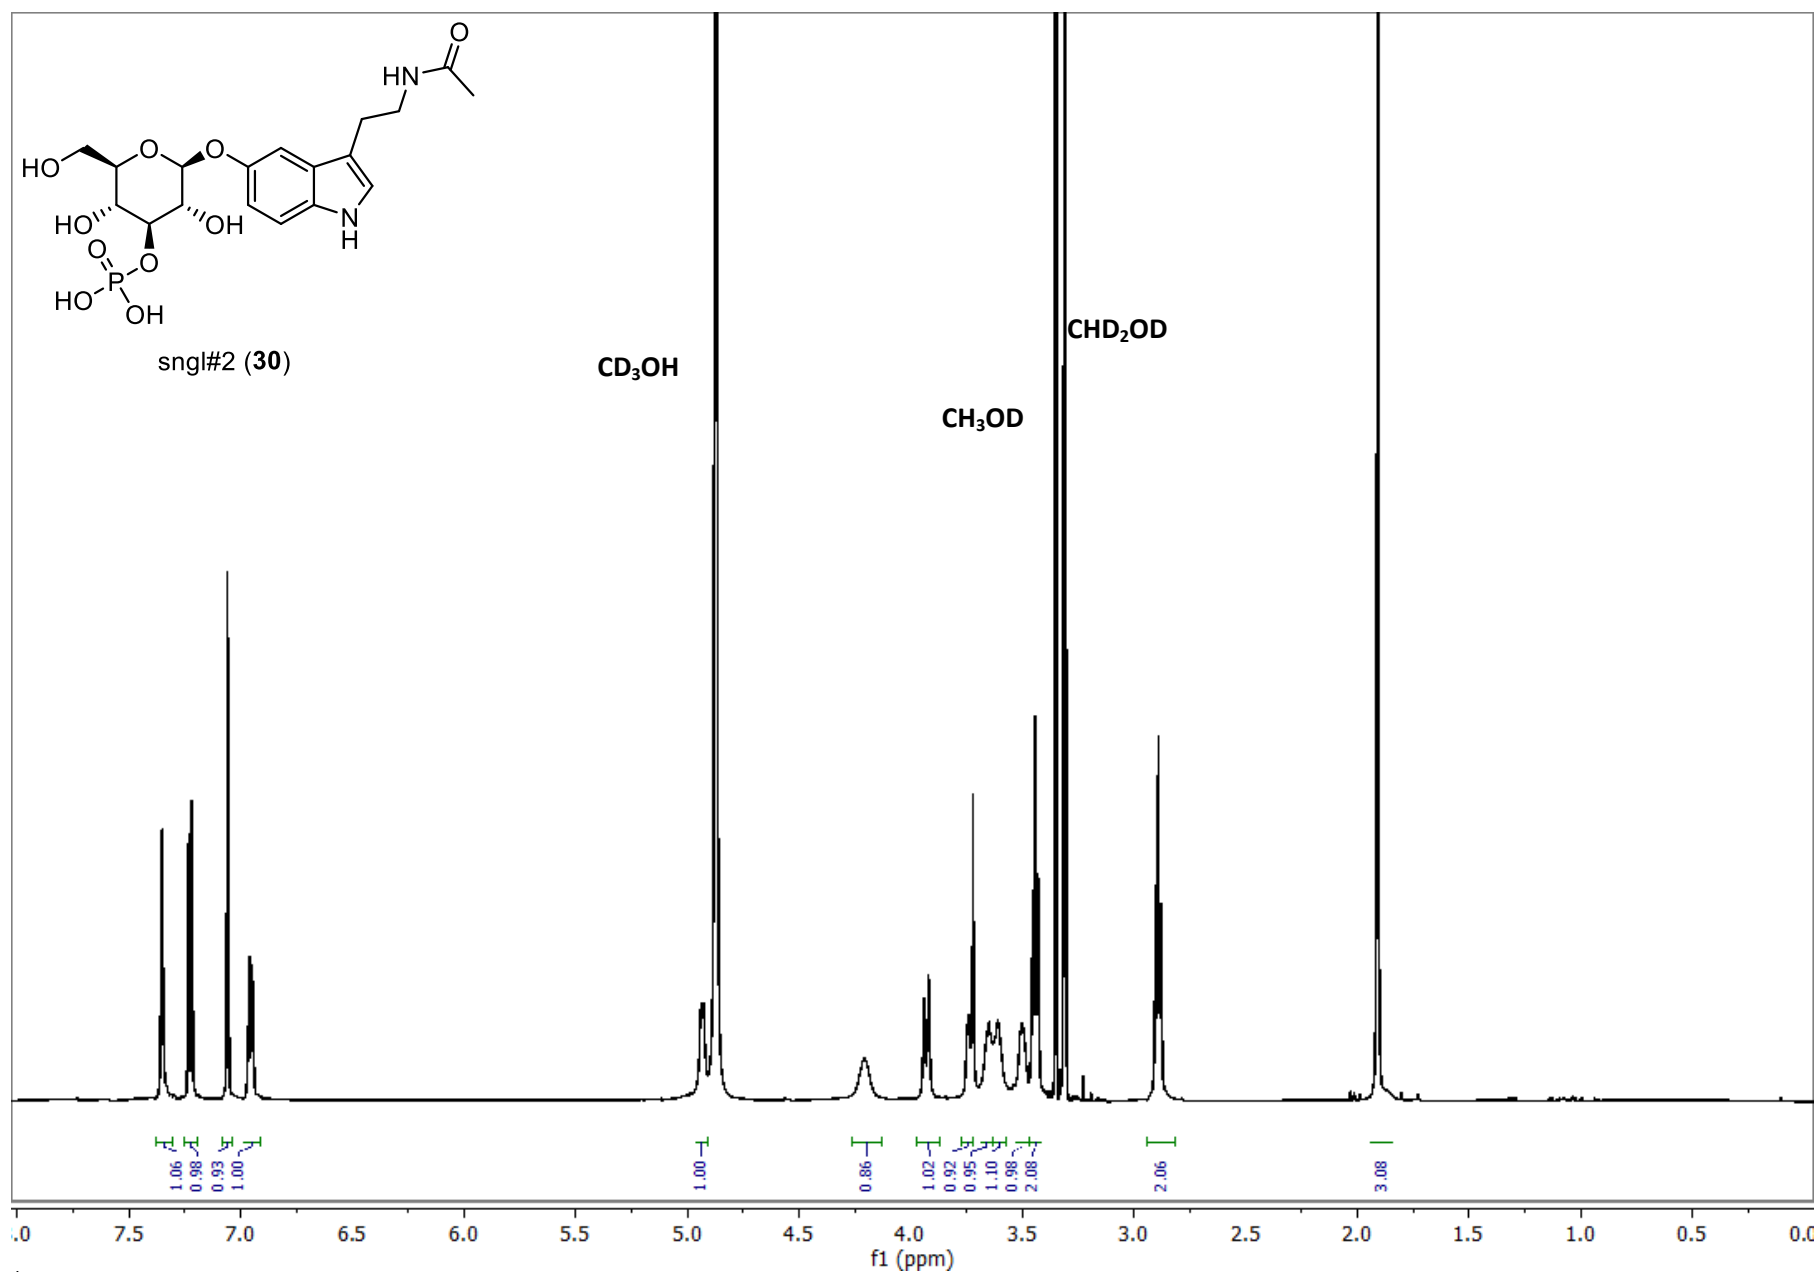

$^1\text{H}$  NMR spectrum (600 MHz) of **sngl#2 (30)** in methanol- $d_4$ .

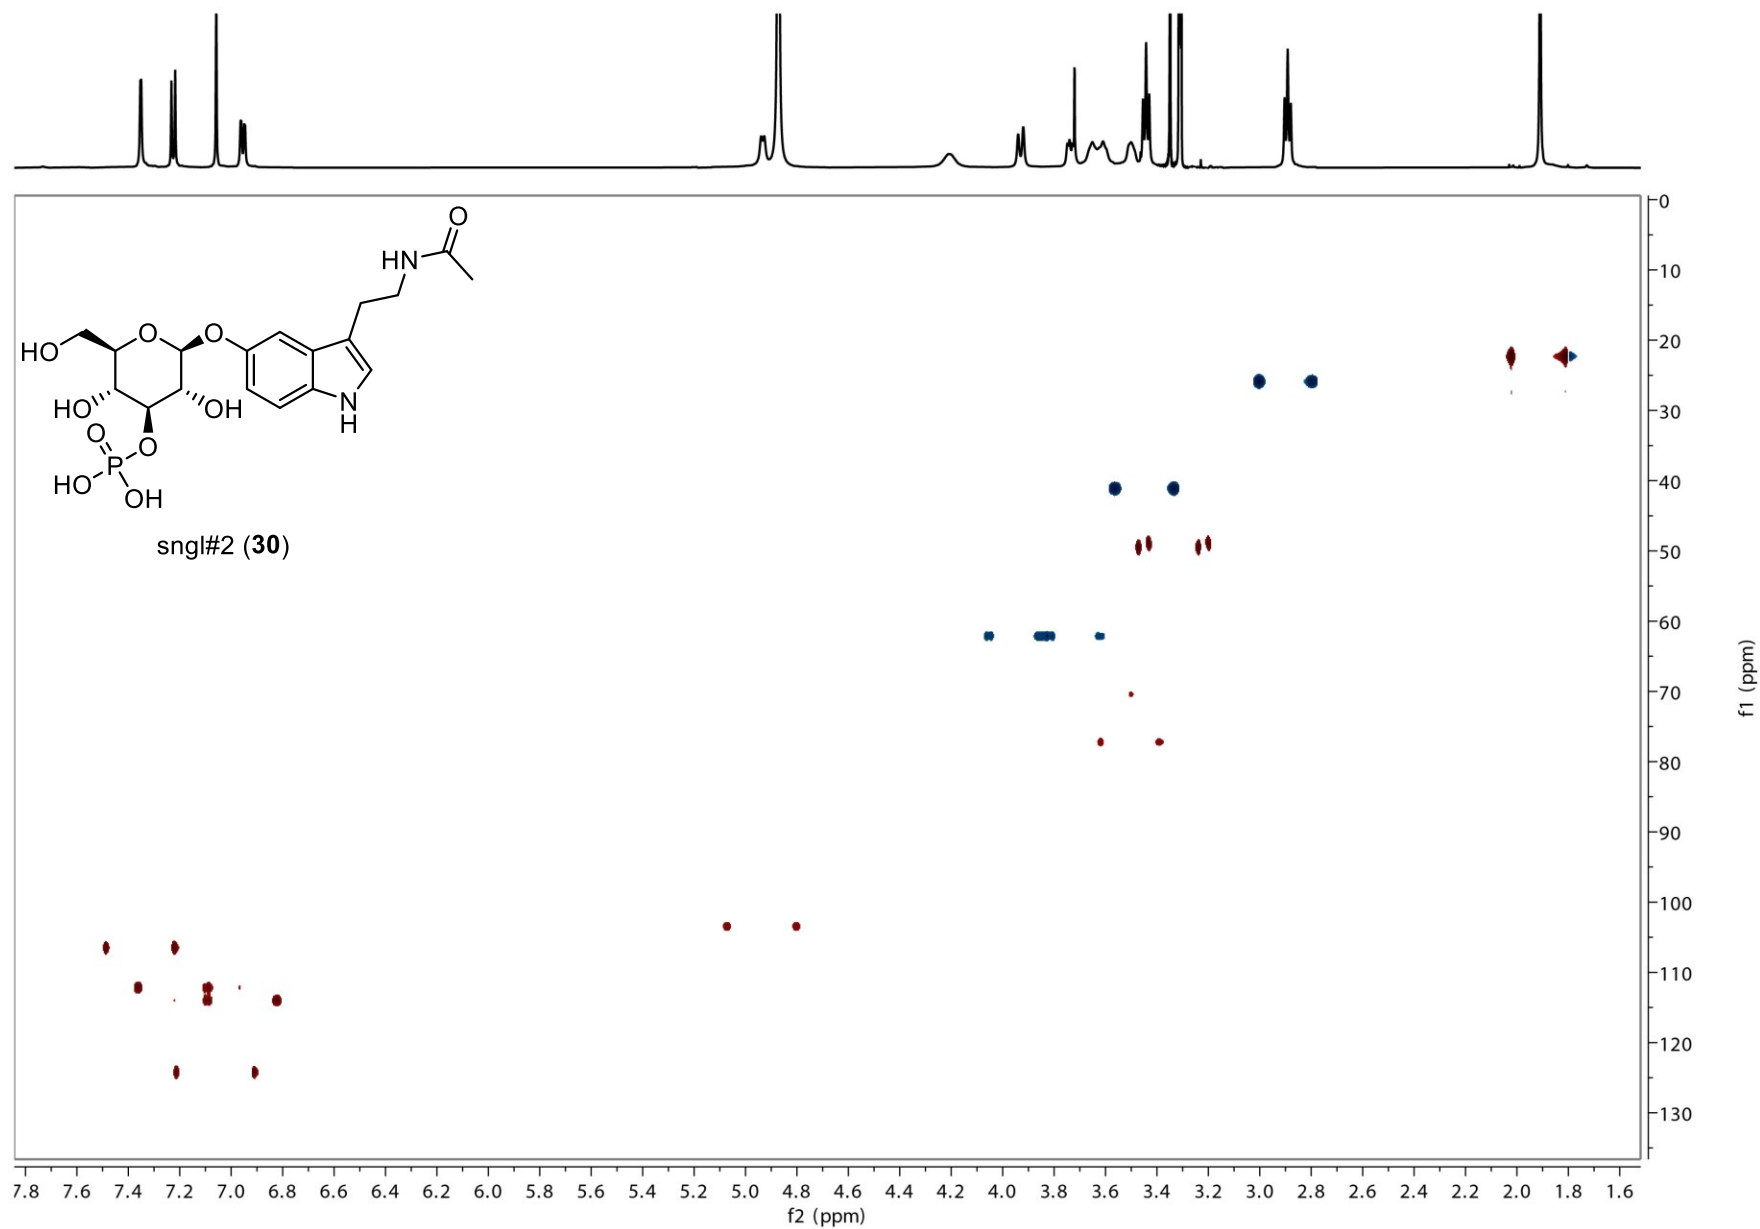

HSQC spectrum (600 MHz) of sngl#2 (**30**) in methanol- $d_4$ .

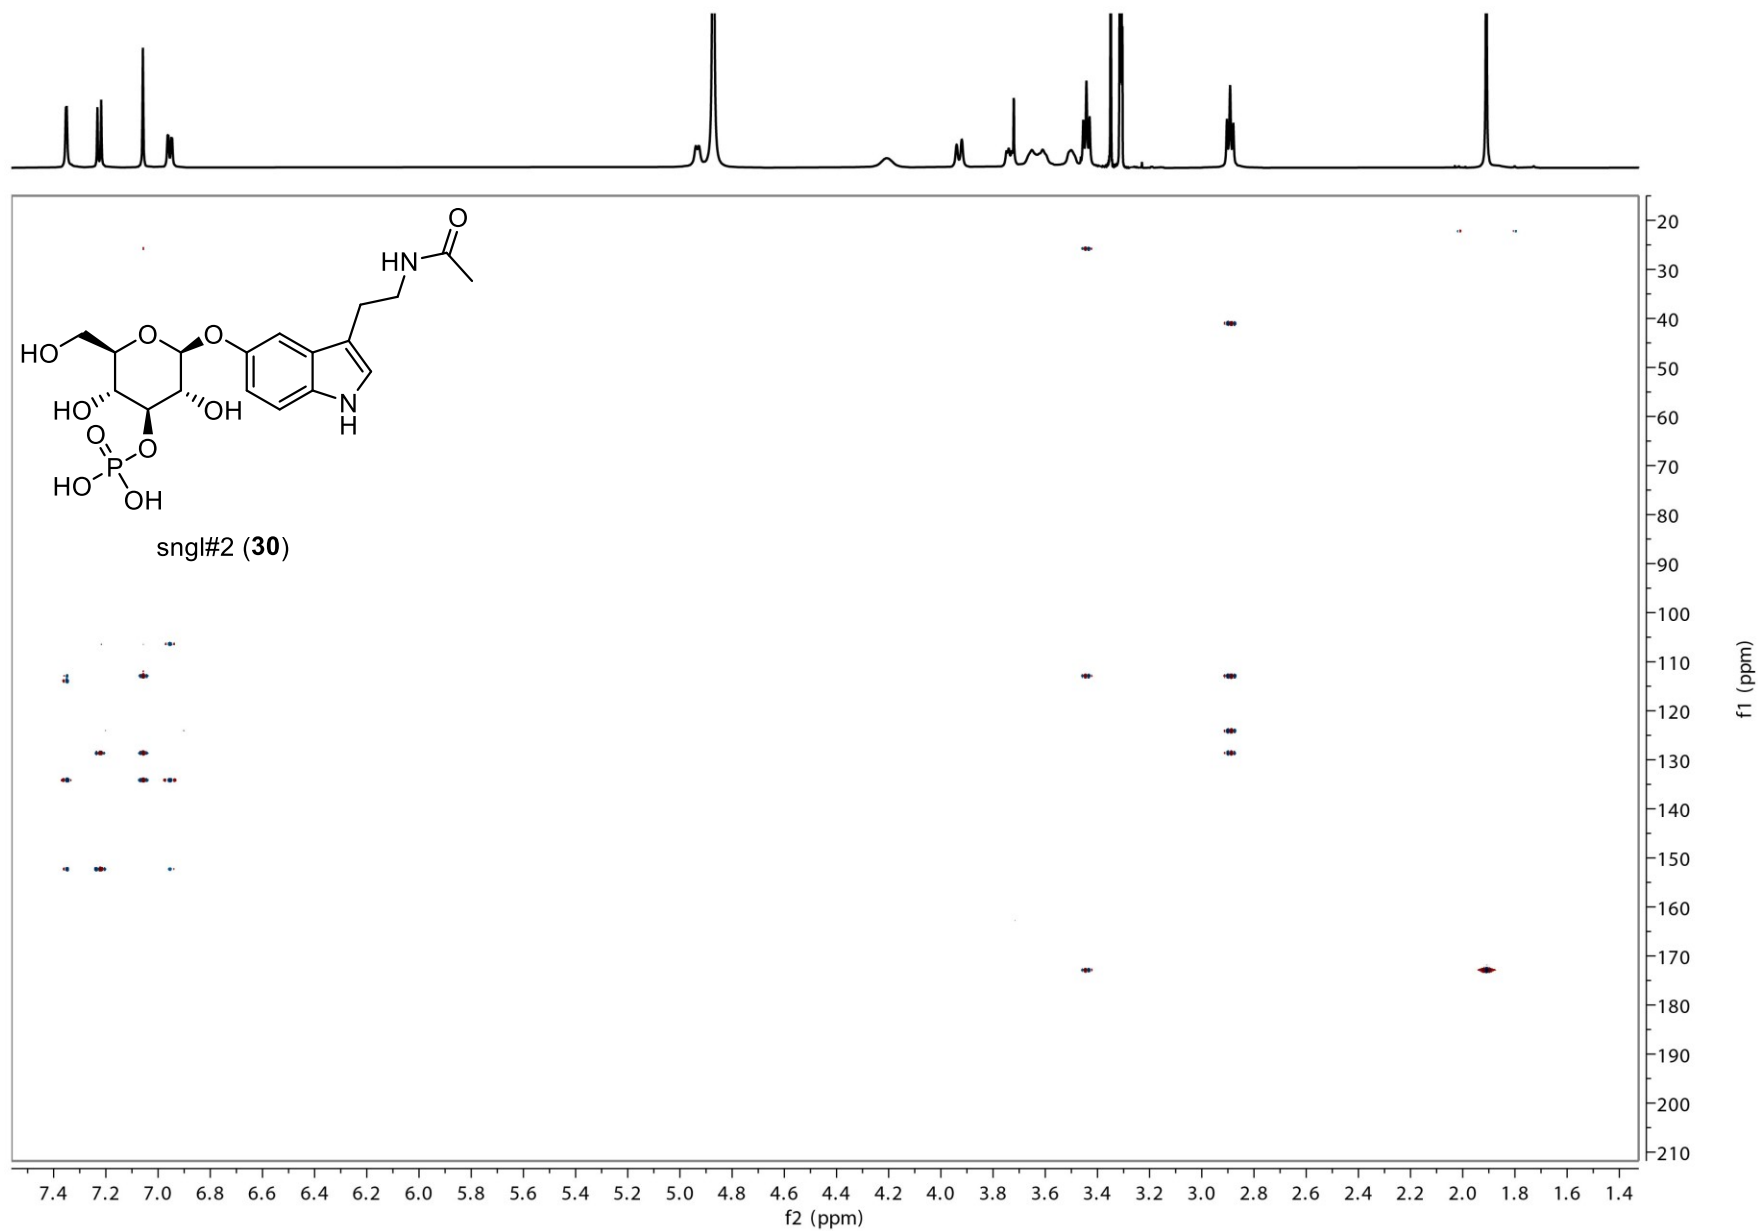

HMBC spectrum (600 MHz) of sngl#2 (**30**) in methanol- $d_4$ .

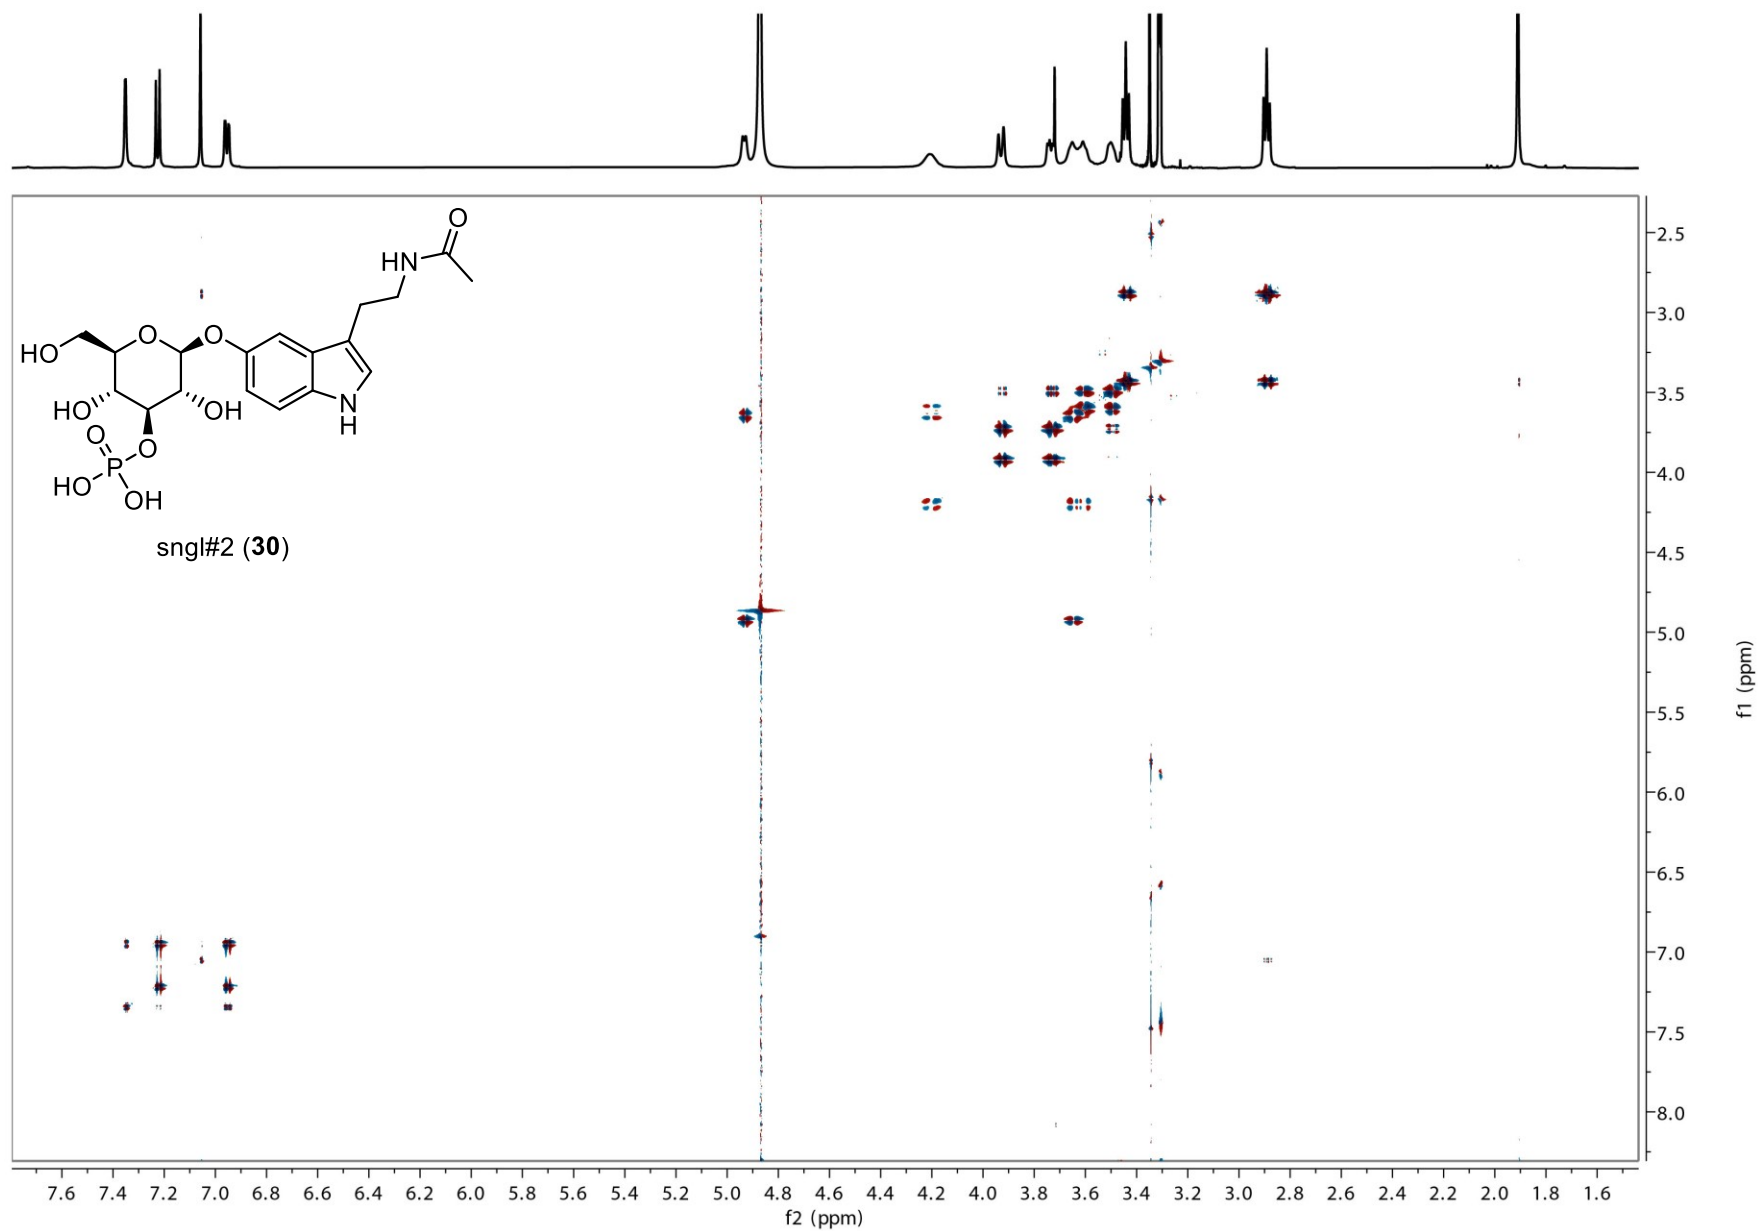

dqfCOSY spectrum (600 MHz) of sngl#2 (**30**) in methanol- $d_4$ .

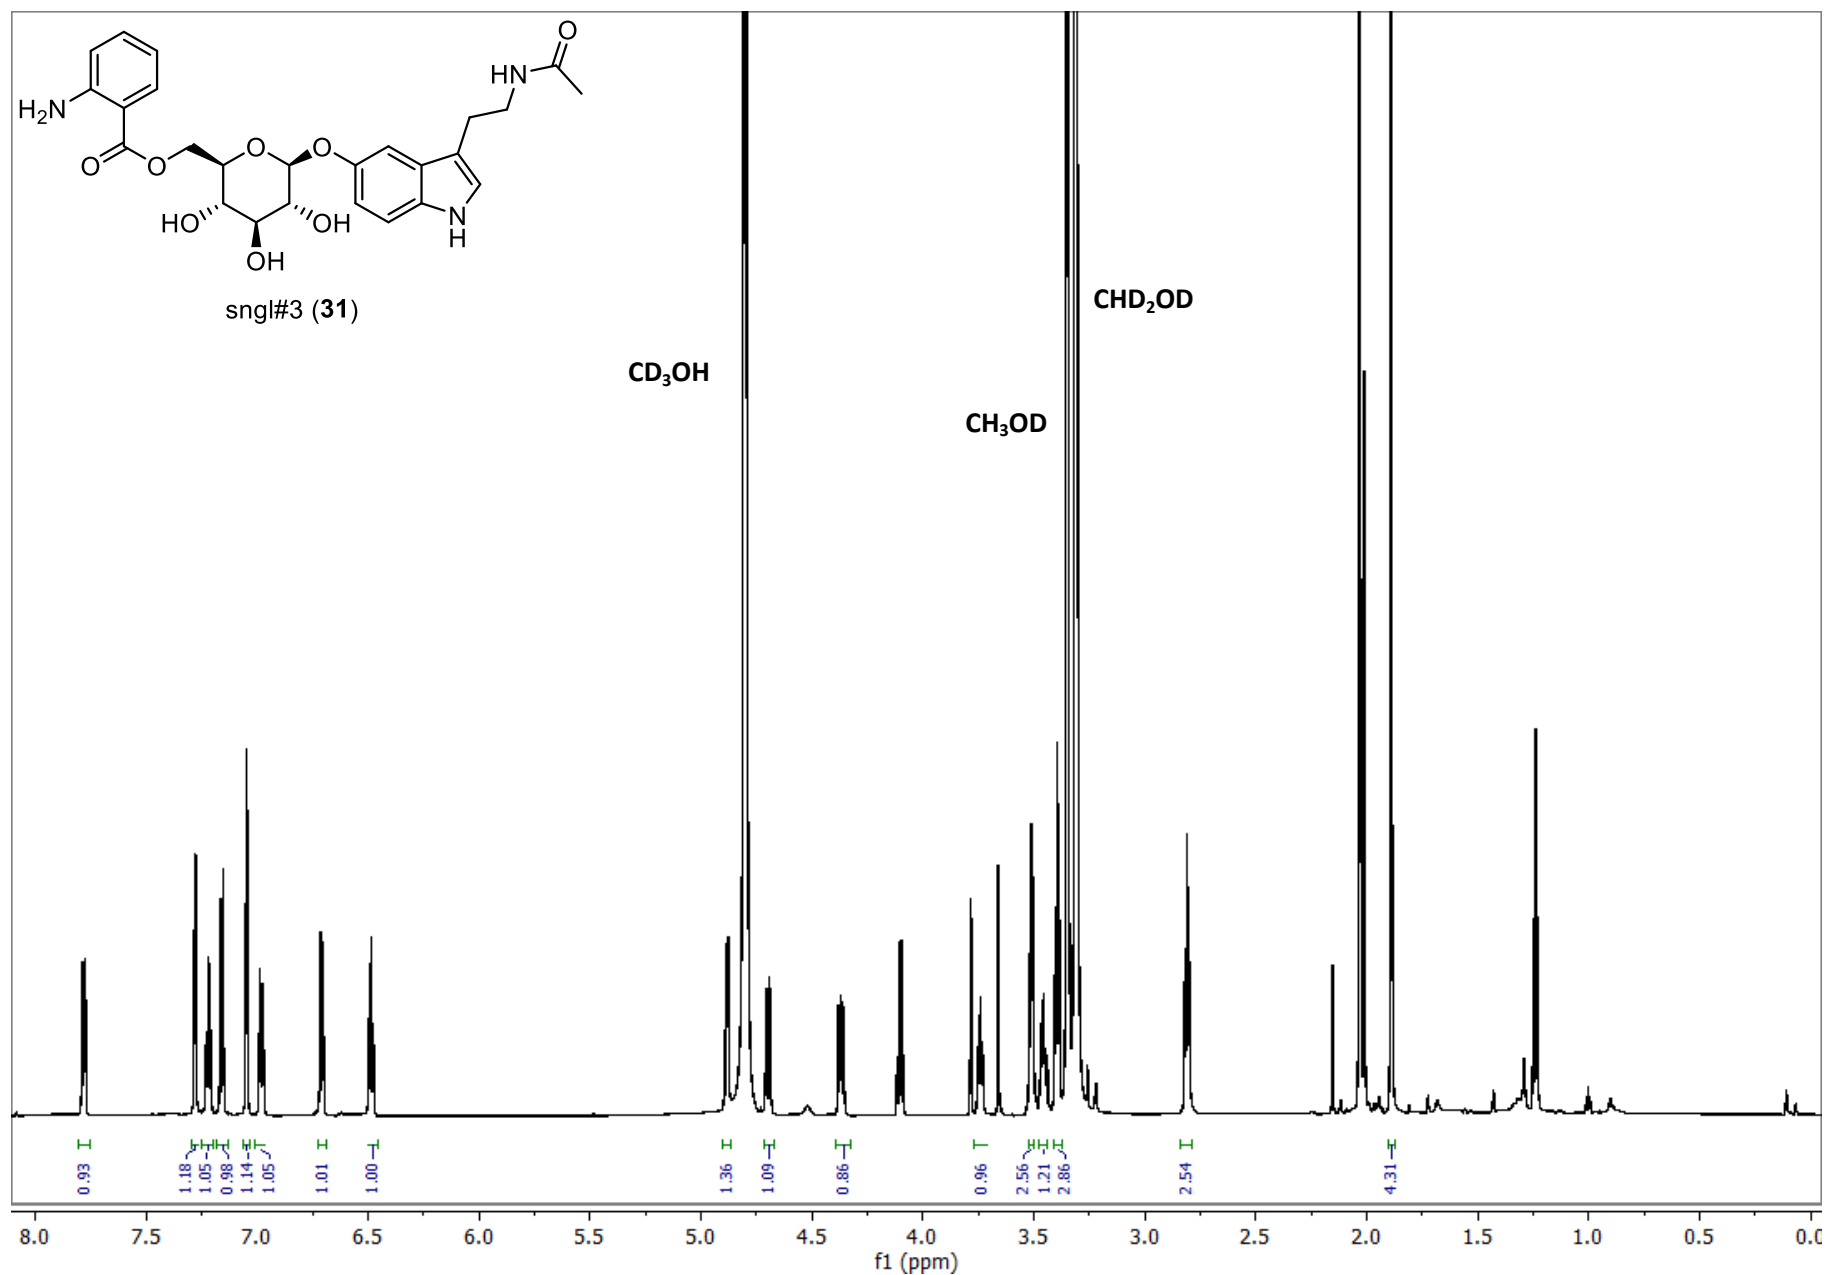

$^1\text{H}$  NMR spectrum (800 MHz) of sngl#3 (**31**) in methanol- $d_4$ .

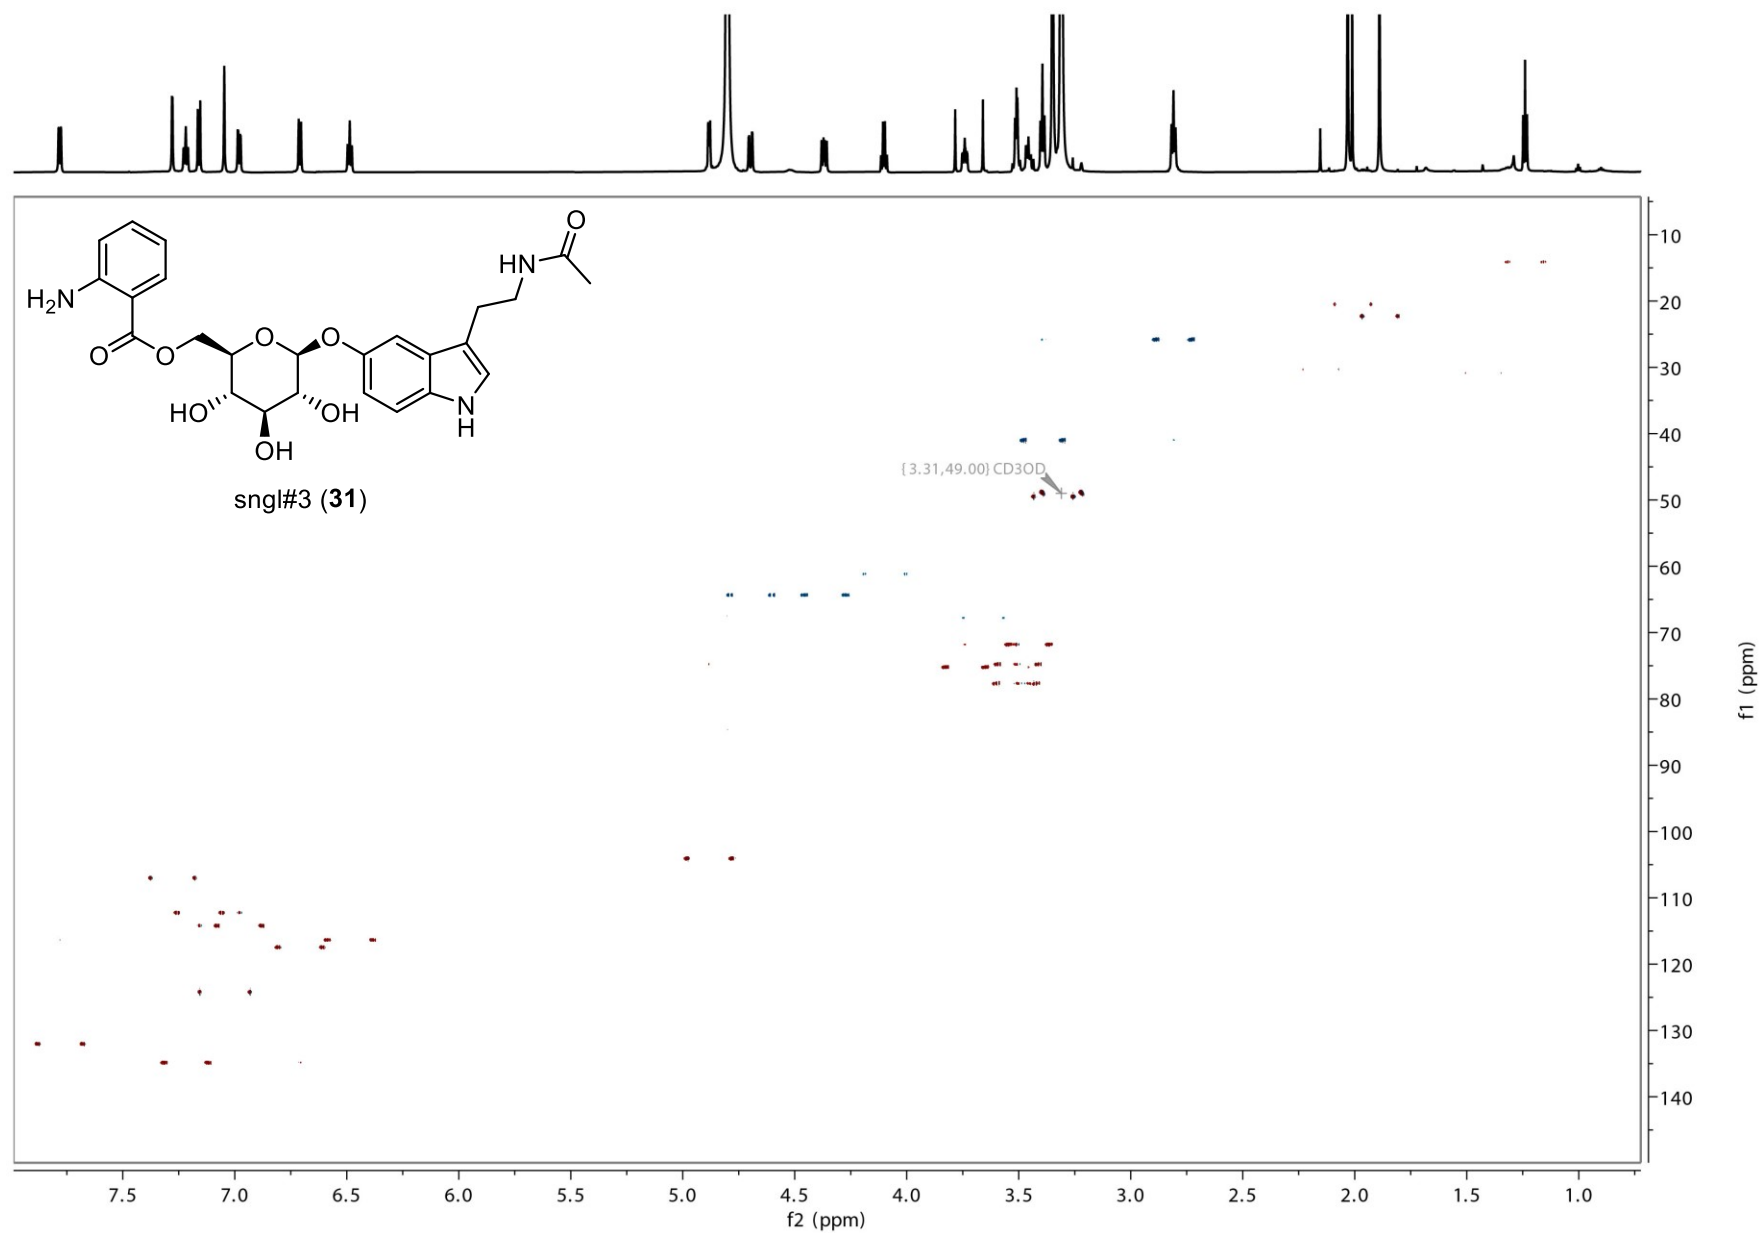

HSQC spectrum (800 MHz) of sngl#3 (**31**) in methanol- $d_4$ .

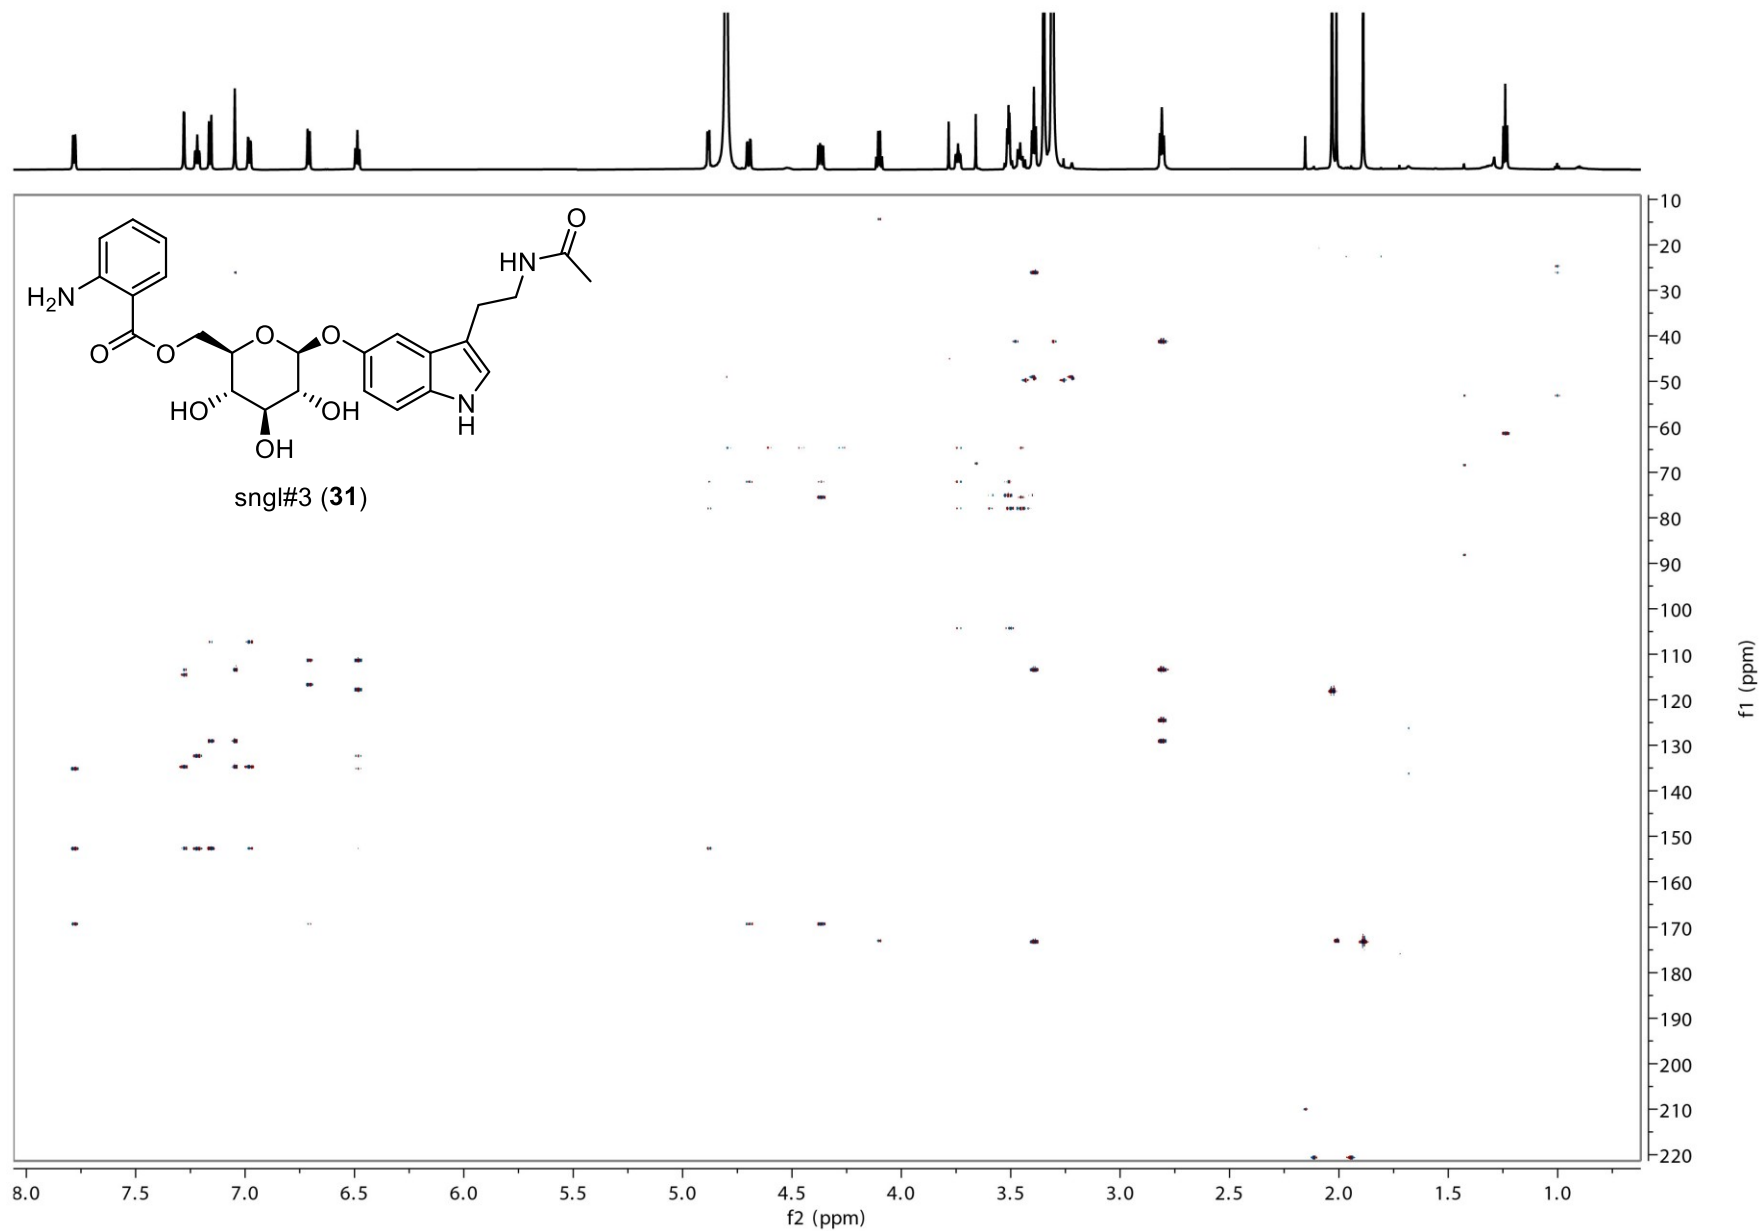

HMBC spectrum (800 MHz) of sngl#3 (**31**) in methanol- $d_4$ .

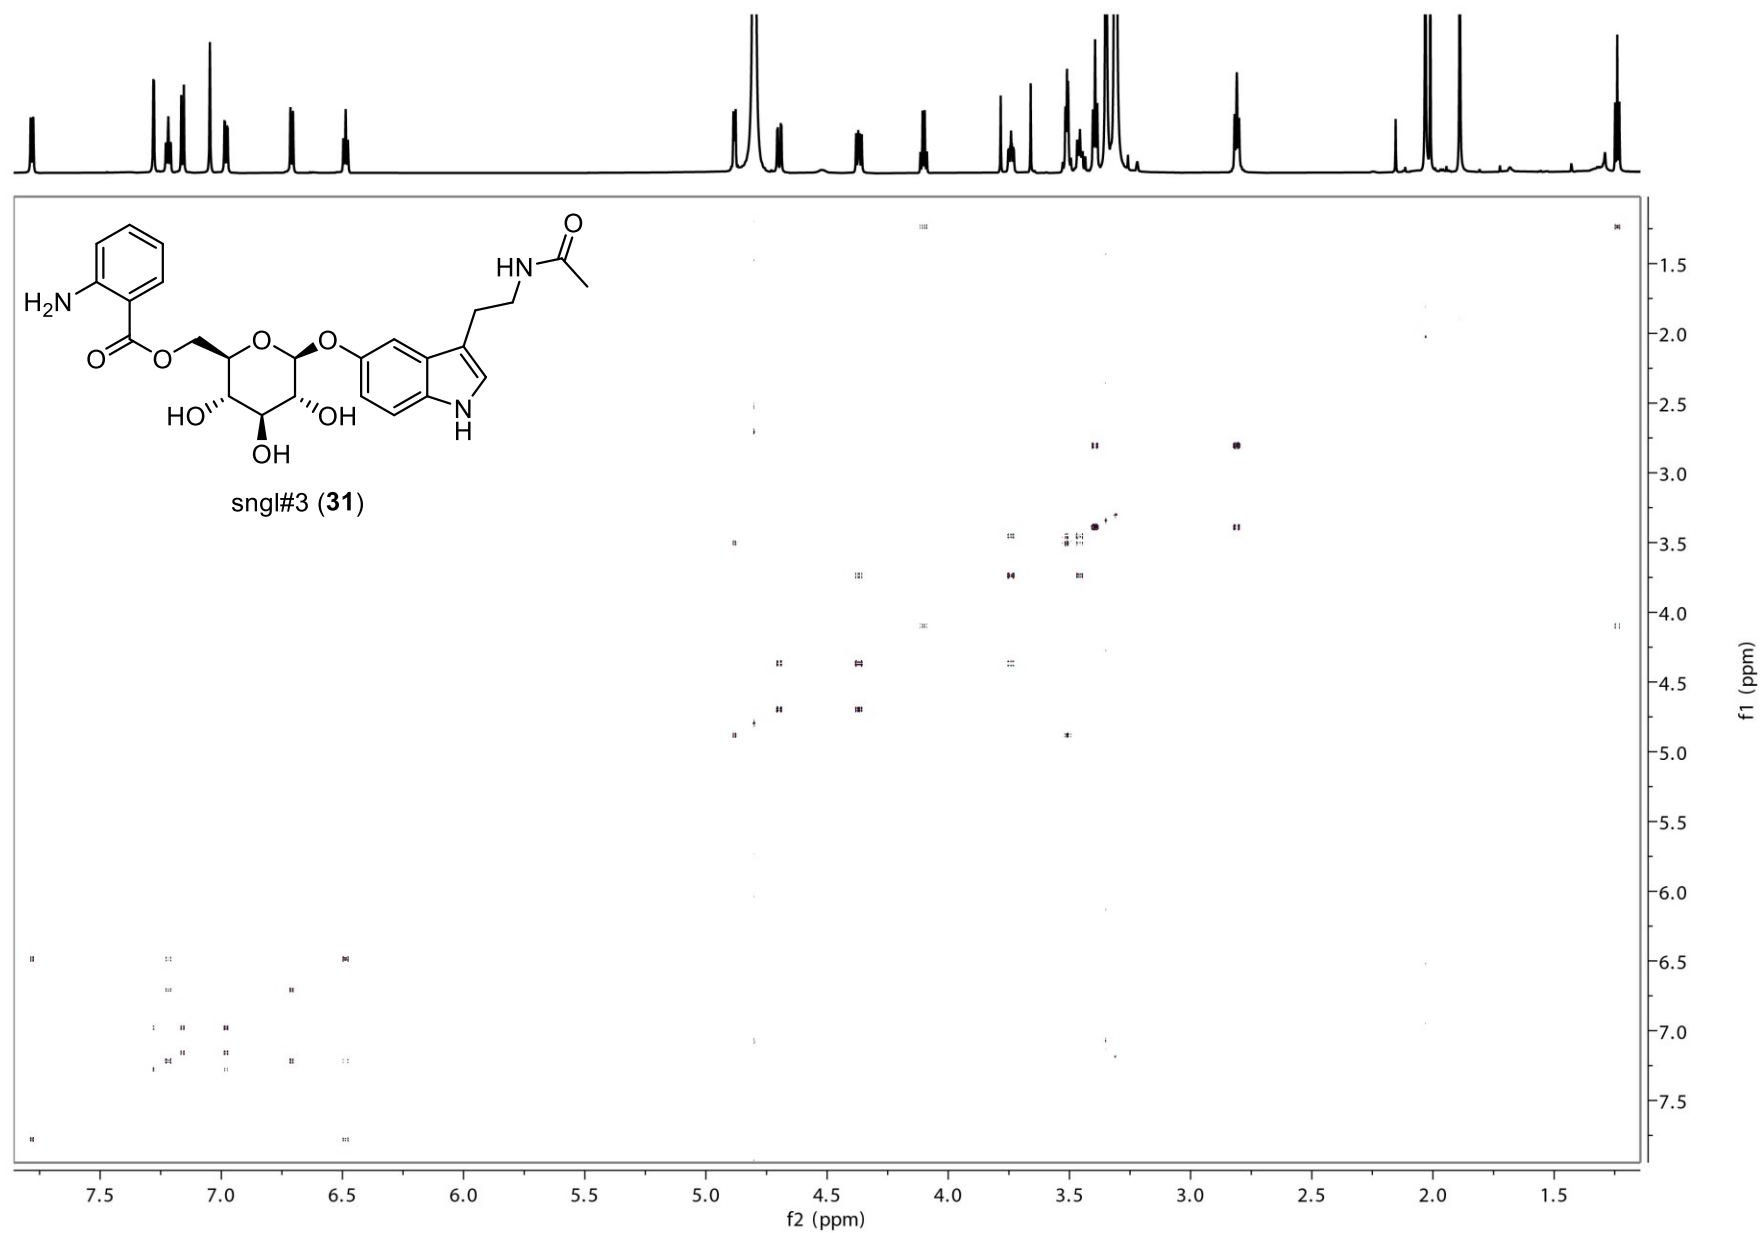

dqfCOSY spectrum (800 MHz) of sngl#3 (**31**) in methanol- $d_4$ .

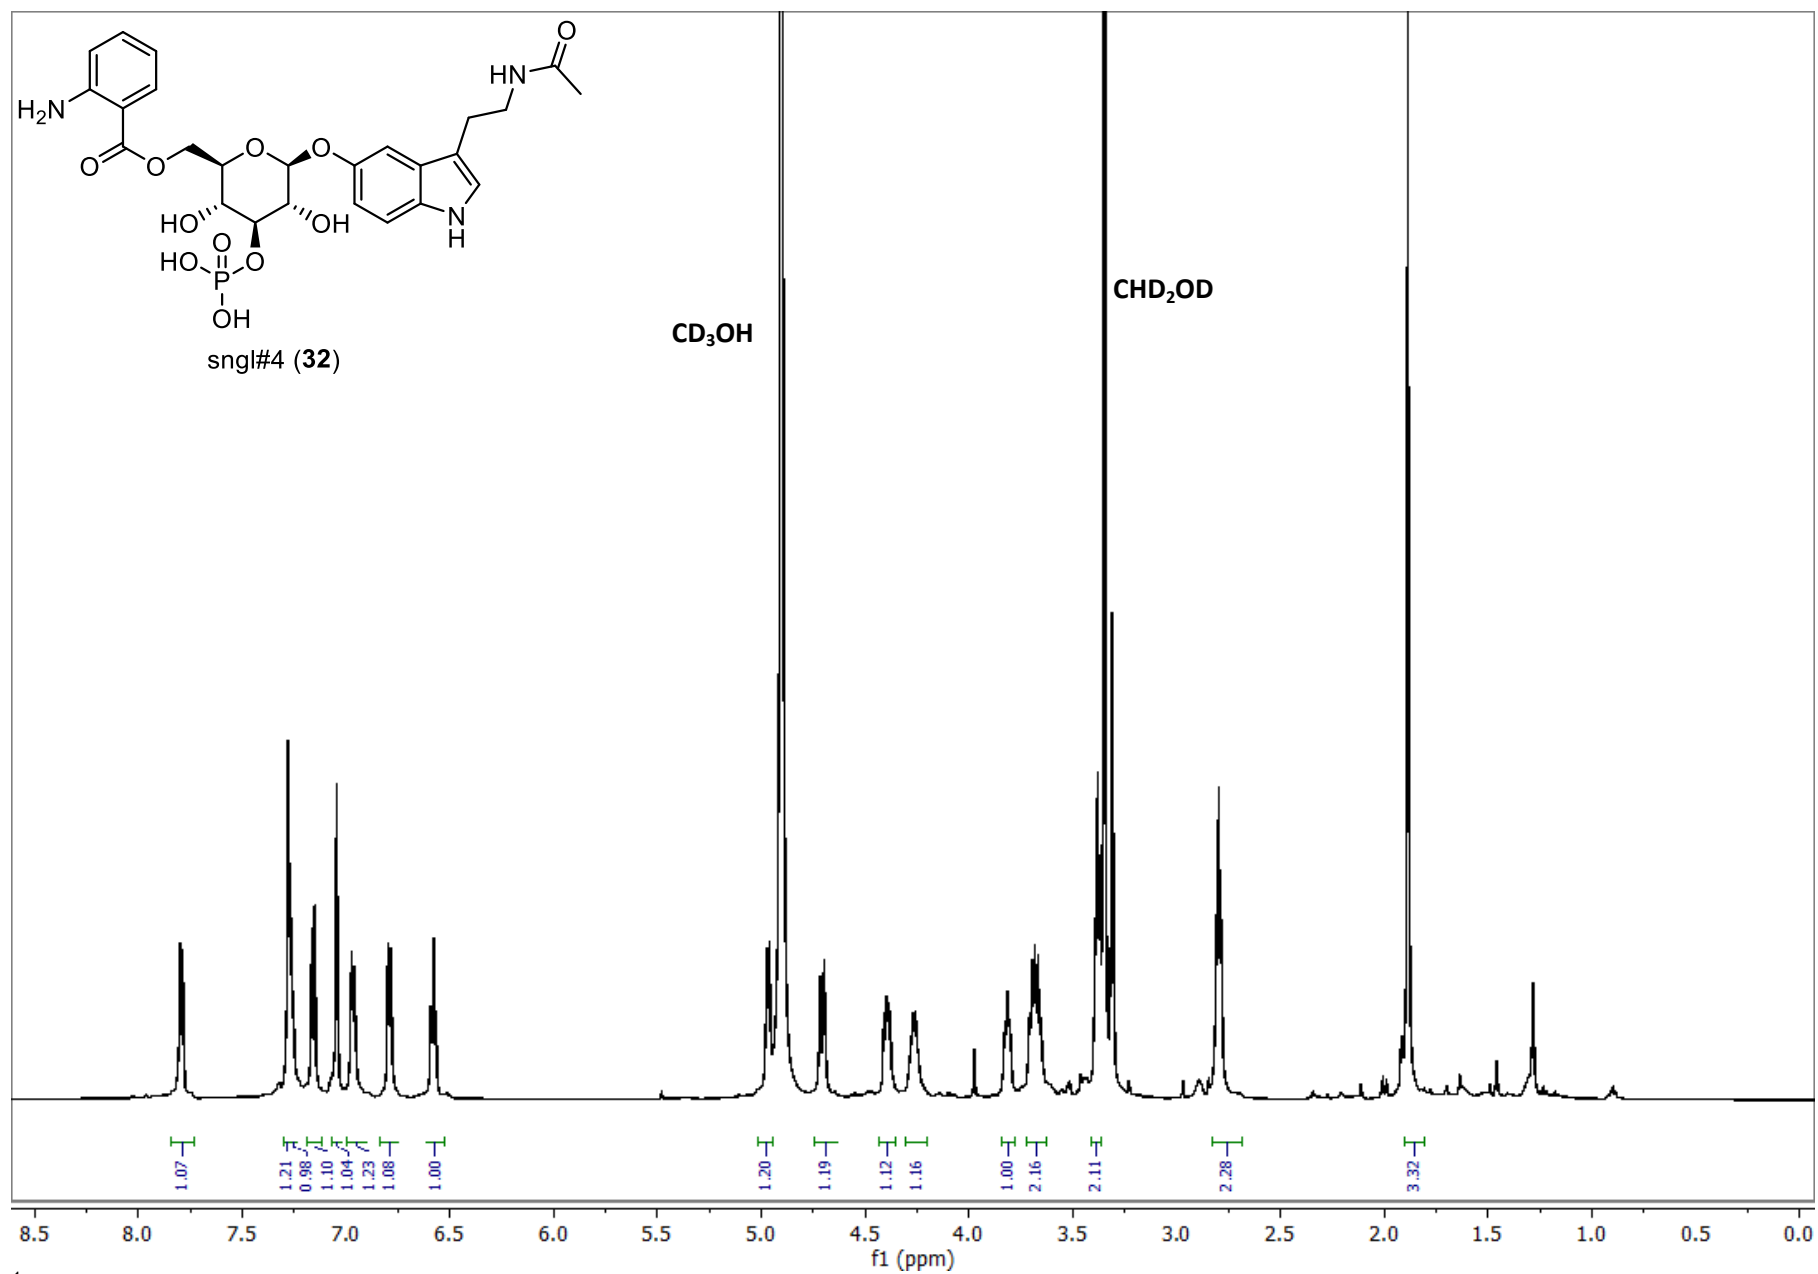

$^1\text{H}$  NMR spectrum (600 MHz) of **sngl#4 (32)** in methanol- $d_4$ .

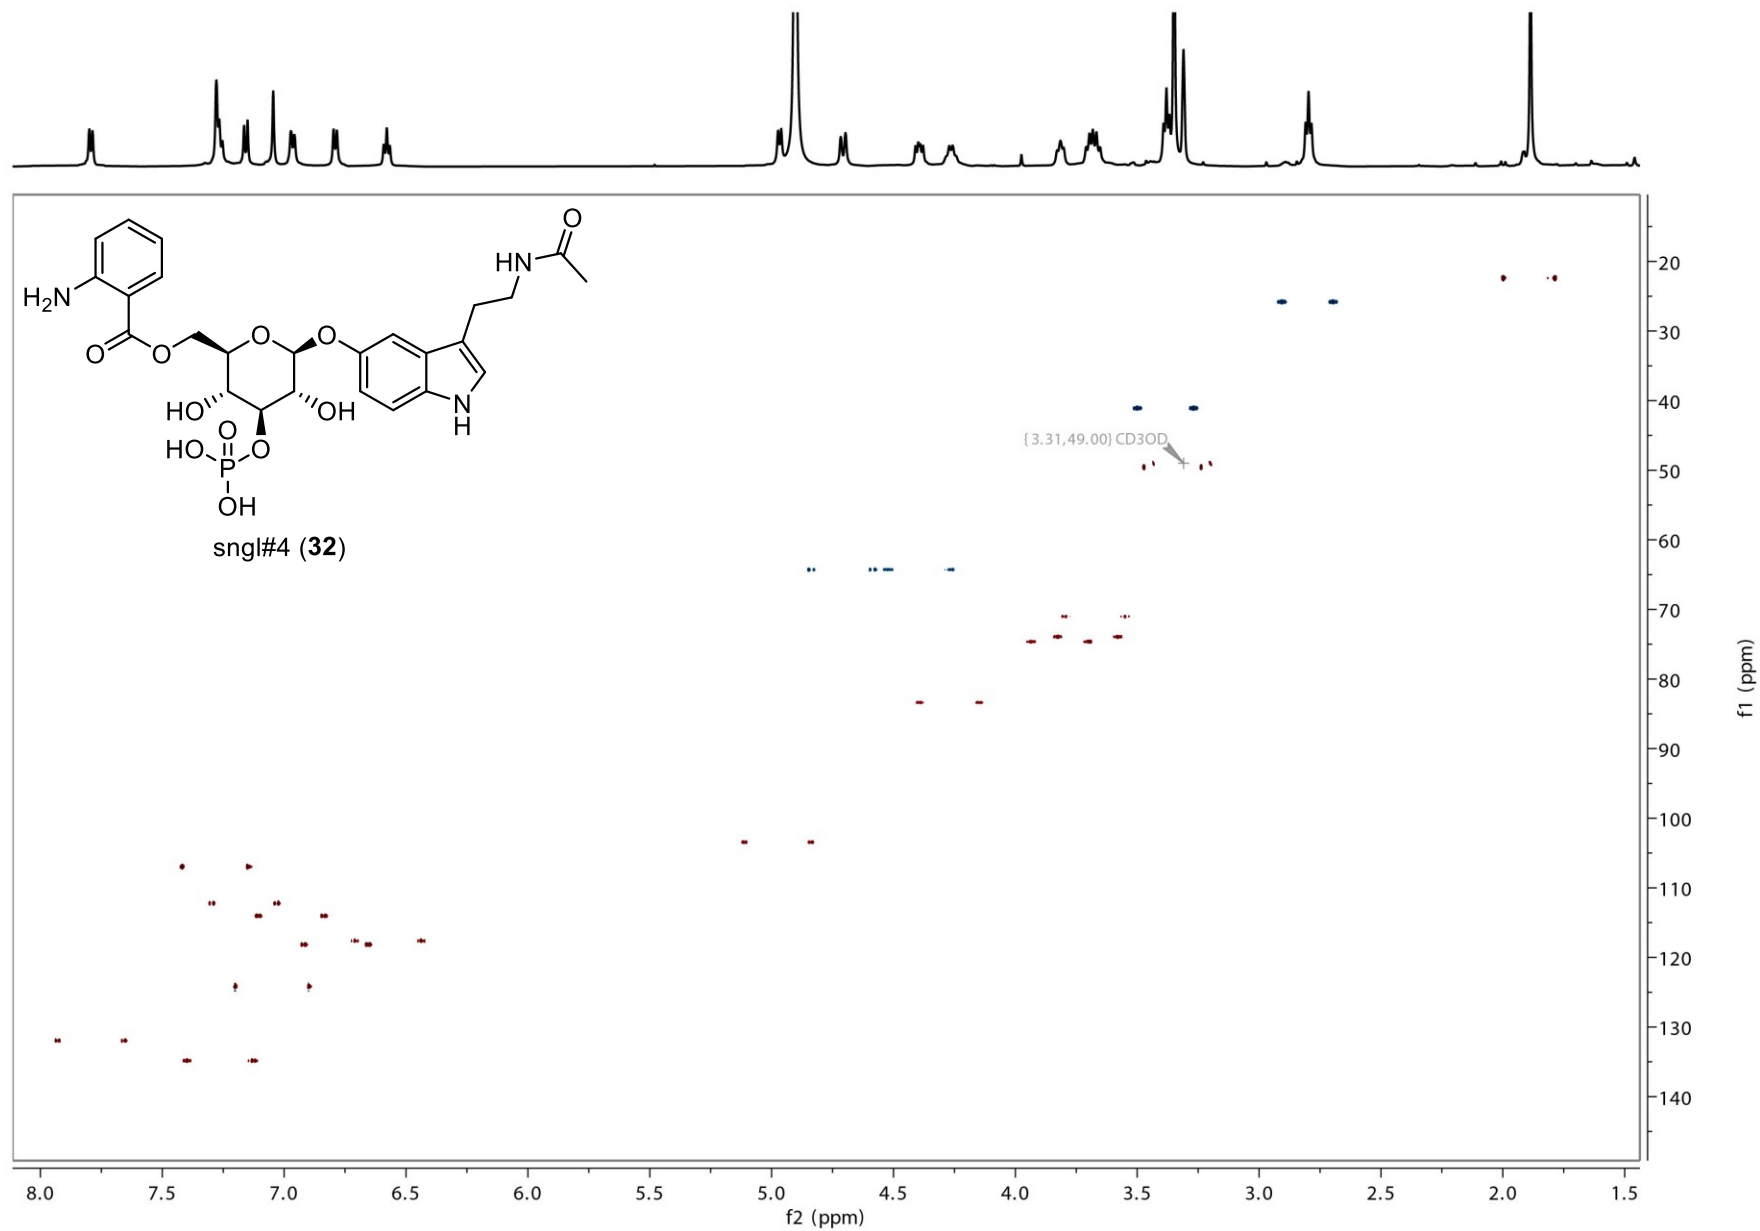

HSQC spectrum (600 MHz) of **sngl#4 (32)** in methanol- $d_4$ .

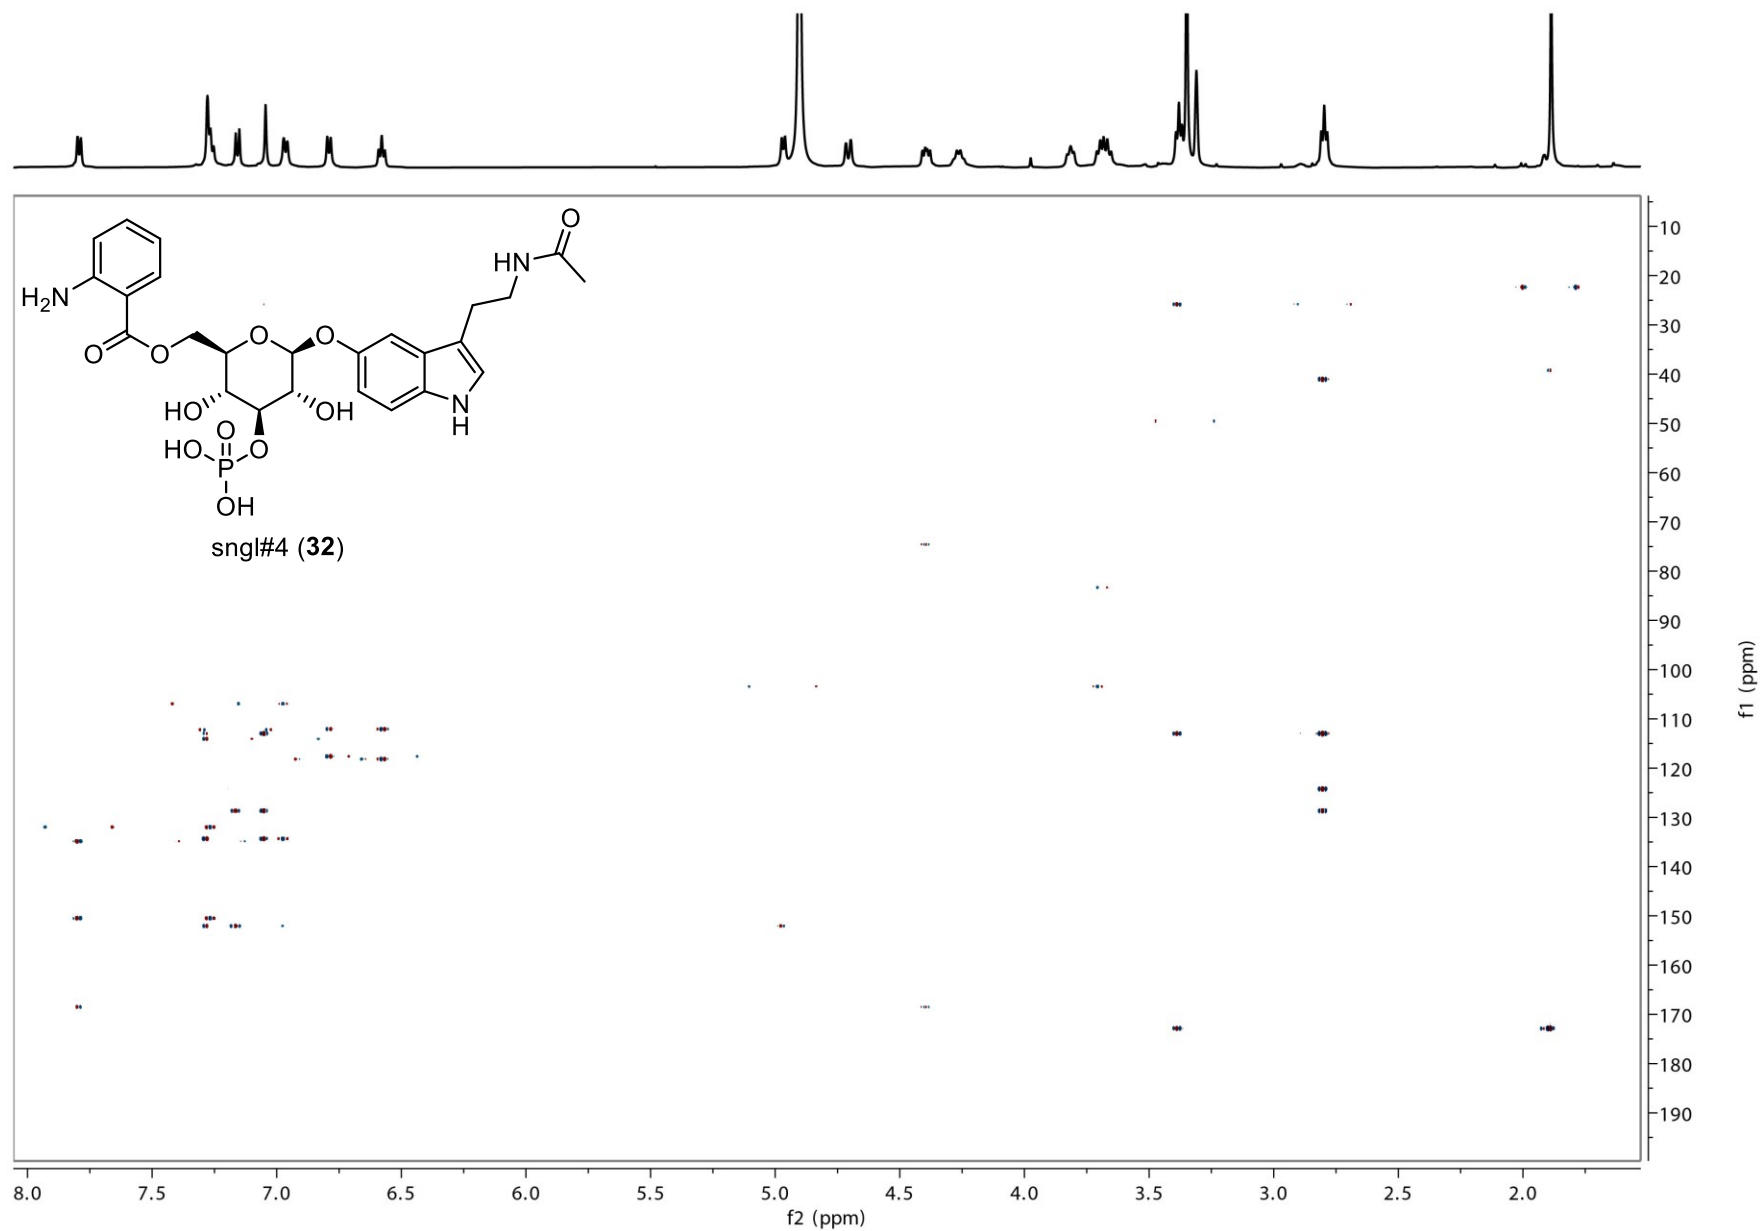

HMBC spectrum (600 MHz) of sngl#4 (**32**) in methanol- $d_4$ .

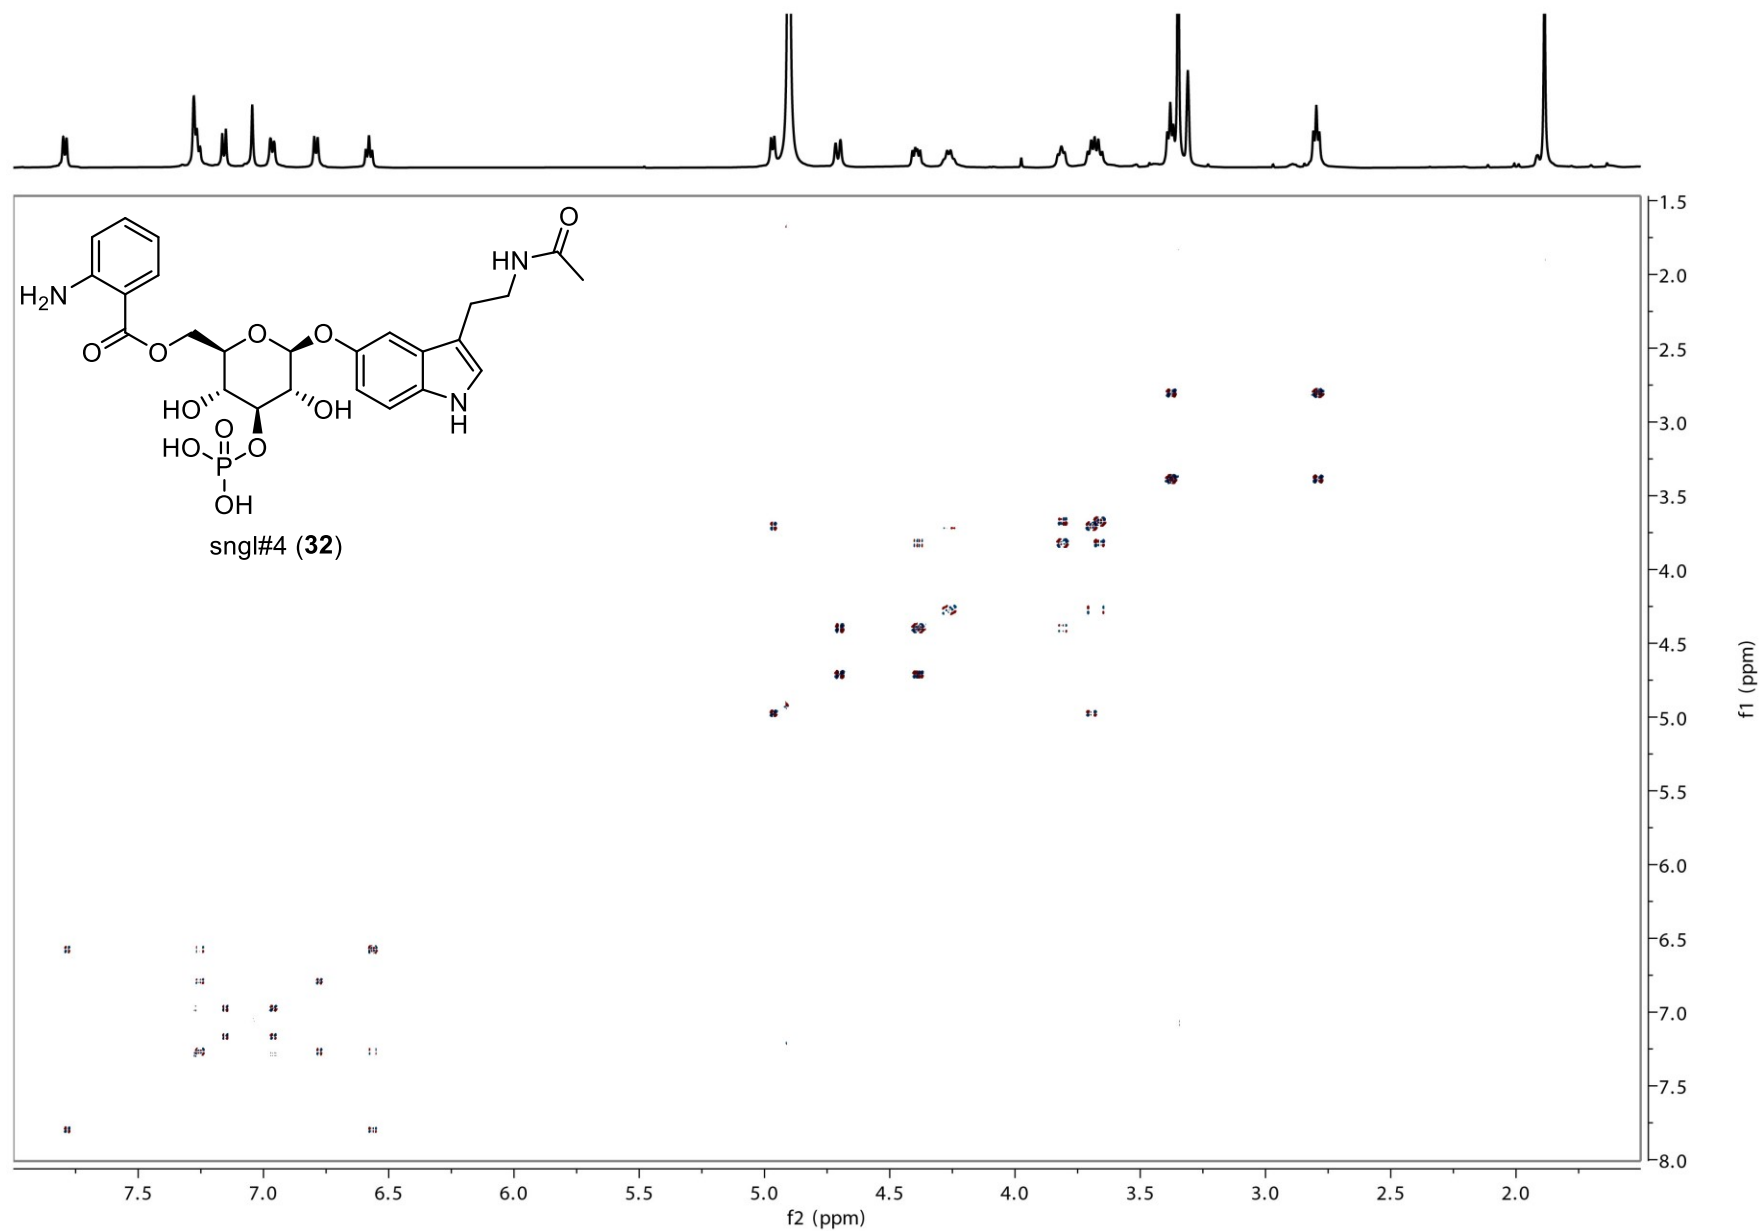

dqfCOSY spectrum (600 MHz) of sngl#4 (**32**) in methanol- $d_4$ .

## 5. Supplementary References

1. Le, H.H. et al. Modular metabolite assembly in *Caenorhabditis elegans* depends on carboxylesterases and formation of lysosome-related organelles. *Elife* **9**(2020).
2. Wrobel, C.J.J. et al. Combinatorial Assembly of Modular Glucosides via Carboxylesterases Regulates *C. elegans* Starvation Survival. *J Am Chem Soc* **143**, 14676-14683 (2021).
3. Baba, T. et al. Construction of *Escherichia coli* K-12 in-frame, single-gene knockout mutants: the Keio collection. *Mol Syst Biol* **2**, 2006 0008 (2006).
4. Pelletier, G., Zwicker, A., Allen, C.L., Schepartz, A. & Miller, S.J. Aqueous Glycosylation of Unprotected Sucrose Employing Glycosyl Fluorides in the Presence of Calcium Ion and Trimethylamine. *J Am Chem Soc* **138**, 3175-82 (2016).
5. Wadzinski, T.J. et al. Rapid phenolic O-glycosylation of small molecules and complex unprotected peptides in aqueous solvent. *Nature Chemistry* **10**, 644-652 (2018).
